# Supplementary material for: A highly predictive signature of cognition and brain atrophy for progression to Alzheimer's dementia
Source: PubMed Central journal article supplement (PMC6511068; doi:10.1093/gigascience/giz055), 2019-05-11
Supplement: giz055_giga-d-18-00349_original_submission.pdf [file giz055_giga-d-18-00349_original_submission.pdf]

# GigaScience

## A highly predictive signature of cognition and brain atrophy for progression to Alzheimer's dementia --Manuscript Draft--

|                                                      |                                                                                                                                                                                                                                                                                                                                                                                                                                                                                                                                                                                                                                                                                                                                                                                                                                                                                                                                                                                                                                                                                                                                                                                                                                                                                               |                  |
|------------------------------------------------------|-----------------------------------------------------------------------------------------------------------------------------------------------------------------------------------------------------------------------------------------------------------------------------------------------------------------------------------------------------------------------------------------------------------------------------------------------------------------------------------------------------------------------------------------------------------------------------------------------------------------------------------------------------------------------------------------------------------------------------------------------------------------------------------------------------------------------------------------------------------------------------------------------------------------------------------------------------------------------------------------------------------------------------------------------------------------------------------------------------------------------------------------------------------------------------------------------------------------------------------------------------------------------------------------------|------------------|
| <b>Manuscript Number:</b>                            | GIGA-D-18-00349                                                                                                                                                                                                                                                                                                                                                                                                                                                                                                                                                                                                                                                                                                                                                                                                                                                                                                                                                                                                                                                                                                                                                                                                                                                                               |                  |
| <b>Full Title:</b>                                   | A highly predictive signature of cognition and brain atrophy for progression to Alzheimer's dementia                                                                                                                                                                                                                                                                                                                                                                                                                                                                                                                                                                                                                                                                                                                                                                                                                                                                                                                                                                                                                                                                                                                                                                                          |                  |
| <b>Article Type:</b>                                 | Research                                                                                                                                                                                                                                                                                                                                                                                                                                                                                                                                                                                                                                                                                                                                                                                                                                                                                                                                                                                                                                                                                                                                                                                                                                                                                      |                  |
| <b>Funding Information:</b>                          | Canadian Network for Research and Innovation in Machining Technology, Natural Sciences and Engineering Research Council of Canada (CA) (RN000028)                                                                                                                                                                                                                                                                                                                                                                                                                                                                                                                                                                                                                                                                                                                                                                                                                                                                                                                                                                                                                                                                                                                                             | Dr Pierre Bellec |
|                                                      | Courtois Foundation (n/a)                                                                                                                                                                                                                                                                                                                                                                                                                                                                                                                                                                                                                                                                                                                                                                                                                                                                                                                                                                                                                                                                                                                                                                                                                                                                     | Dr Pierre Bellec |
|                                                      | Lemaire Foundation (n/a)                                                                                                                                                                                                                                                                                                                                                                                                                                                                                                                                                                                                                                                                                                                                                                                                                                                                                                                                                                                                                                                                                                                                                                                                                                                                      | Dr Pierre Bellec |
| <b>Abstract:</b>                                     | <p>Patients with mild cognitive impairment (MCI) are at risk of progressing to Alzheimer's dementia, yet only a fraction of them do. We explore here whether a very high-risk MCI subgroup can be identified using cognitive assessments and structural neuroimaging. A multimodal signature of Alzheimer's dementia was first extracted using machine learning tools in the ADNI1 sample, and was comprised of cognitive deficits across multiple domains as well as atrophy in temporal, parietal and occipital regions. We then validated the predictive value of this signature on two MCI cohorts. In ADNI1 (N=235), the presence of the signature predicted progression to dementia over three years with 80.4% positive predictive value, adjusted for a "typical" MCI baseline rate of 33% (95.6% specificity, 55.1% sensitivity). These results were replicated in ADNI2 (N=235), with 87.8% adjusted positive predictive value (96.7% specificity, 47.3% sensitivity). Our results demonstrate that, even for widely used markers, marked improvement in positive predictive value over the literature can be achieved by focusing on a subgroup of individuals with similar brain characteristics. The signature can be readily applied for the enrichment of clinical trials.</p> |                  |
| <b>Corresponding Author:</b>                         | Angela Tam, PhD<br>Centre de recherche de l'institut universitaire de gériatrie de Montréal<br>Montreal, Quebec CANADA                                                                                                                                                                                                                                                                                                                                                                                                                                                                                                                                                                                                                                                                                                                                                                                                                                                                                                                                                                                                                                                                                                                                                                        |                  |
| <b>Corresponding Author Secondary Information:</b>   |                                                                                                                                                                                                                                                                                                                                                                                                                                                                                                                                                                                                                                                                                                                                                                                                                                                                                                                                                                                                                                                                                                                                                                                                                                                                                               |                  |
| <b>Corresponding Author's Institution:</b>           | Centre de recherche de l'institut universitaire de gériatrie de Montréal                                                                                                                                                                                                                                                                                                                                                                                                                                                                                                                                                                                                                                                                                                                                                                                                                                                                                                                                                                                                                                                                                                                                                                                                                      |                  |
| <b>Corresponding Author's Secondary Institution:</b> |                                                                                                                                                                                                                                                                                                                                                                                                                                                                                                                                                                                                                                                                                                                                                                                                                                                                                                                                                                                                                                                                                                                                                                                                                                                                                               |                  |
| <b>First Author:</b>                                 | Angela Tam, PhD                                                                                                                                                                                                                                                                                                                                                                                                                                                                                                                                                                                                                                                                                                                                                                                                                                                                                                                                                                                                                                                                                                                                                                                                                                                                               |                  |
| <b>First Author Secondary Information:</b>           |                                                                                                                                                                                                                                                                                                                                                                                                                                                                                                                                                                                                                                                                                                                                                                                                                                                                                                                                                                                                                                                                                                                                                                                                                                                                                               |                  |
| <b>Order of Authors:</b>                             | Angela Tam, PhD                                                                                                                                                                                                                                                                                                                                                                                                                                                                                                                                                                                                                                                                                                                                                                                                                                                                                                                                                                                                                                                                                                                                                                                                                                                                               |                  |
|                                                      | Christian Dansereau, PhD                                                                                                                                                                                                                                                                                                                                                                                                                                                                                                                                                                                                                                                                                                                                                                                                                                                                                                                                                                                                                                                                                                                                                                                                                                                                      |                  |
|                                                      | Yasser Iturria-Medina, PhD                                                                                                                                                                                                                                                                                                                                                                                                                                                                                                                                                                                                                                                                                                                                                                                                                                                                                                                                                                                                                                                                                                                                                                                                                                                                    |                  |
|                                                      | Sebastian Urchs, MSc                                                                                                                                                                                                                                                                                                                                                                                                                                                                                                                                                                                                                                                                                                                                                                                                                                                                                                                                                                                                                                                                                                                                                                                                                                                                          |                  |
|                                                      | Pierre Orban, PhD                                                                                                                                                                                                                                                                                                                                                                                                                                                                                                                                                                                                                                                                                                                                                                                                                                                                                                                                                                                                                                                                                                                                                                                                                                                                             |                  |
|                                                      | Hanad Sharmarke, BSc                                                                                                                                                                                                                                                                                                                                                                                                                                                                                                                                                                                                                                                                                                                                                                                                                                                                                                                                                                                                                                                                                                                                                                                                                                                                          |                  |
|                                                      | John Breitner, MD                                                                                                                                                                                                                                                                                                                                                                                                                                                                                                                                                                                                                                                                                                                                                                                                                                                                                                                                                                                                                                                                                                                                                                                                                                                                             |                  |
|                                                      | Pierre Bellec, PhD                                                                                                                                                                                                                                                                                                                                                                                                                                                                                                                                                                                                                                                                                                                                                                                                                                                                                                                                                                                                                                                                                                                                                                                                                                                                            |                  |

|                                                                                                                                                                                                                                                                                                                                                                                                                                                                                                                                     |                 |
|-------------------------------------------------------------------------------------------------------------------------------------------------------------------------------------------------------------------------------------------------------------------------------------------------------------------------------------------------------------------------------------------------------------------------------------------------------------------------------------------------------------------------------------|-----------------|
| <b>Order of Authors Secondary Information:</b>                                                                                                                                                                                                                                                                                                                                                                                                                                                                                      |                 |
| <b>Additional Information:</b>                                                                                                                                                                                                                                                                                                                                                                                                                                                                                                      |                 |
| <b>Question</b>                                                                                                                                                                                                                                                                                                                                                                                                                                                                                                                     | <b>Response</b> |
| Are you submitting this manuscript to a special series or article collection?                                                                                                                                                                                                                                                                                                                                                                                                                                                       | No              |
| <p><b>Experimental design and statistics</b></p> <p>Full details of the experimental design and statistical methods used should be given in the Methods section, as detailed in our <a href="#">Minimum Standards Reporting Checklist</a>. Information essential to interpreting the data presented should be made available in the figure legends.</p> <p>Have you included all the information requested in your manuscript?</p>                                                                                                  | Yes             |
| <p><b>Resources</b></p> <p>A description of all resources used, including antibodies, cell lines, animals and software tools, with enough information to allow them to be uniquely identified, should be included in the Methods section. Authors are strongly encouraged to cite <a href="#">Research Resource Identifiers</a> (RRIDs) for antibodies, model organisms and tools, where possible.</p> <p>Have you included the information requested as detailed in our <a href="#">Minimum Standards Reporting Checklist</a>?</p> | Yes             |
| <p><b>Availability of data and materials</b></p> <p>All datasets and code on which the conclusions of the paper rely must be either included in your submission or deposited in <a href="#">publicly available repositories</a> (where available and ethically appropriate), referencing such data using a unique identifier in the references and in the “Availability of Data and Materials” section of your manuscript.</p>                                                                                                      | Yes             |

Have you have met the above requirement as detailed in our [Minimum Standards Reporting Checklist](#)?

Click here to view linked References

## A highly predictive signature of cognition and brain atrophy for progression to Alzheimer's dementia

Short running title: Signature of future Alzheimer's dementia

Angela Tam<sup>1,2,3,†</sup>, Christian Dansereau<sup>1,4</sup>, Yasser Itturia-Medina<sup>3</sup>, Sebastian Urchs<sup>3</sup>, Pierre Orban<sup>1,5,6</sup>, Hanad Sharmarke<sup>1</sup>, John Breitner<sup>2,3</sup>, Pierre Bellec<sup>1,4,†</sup>, for the Alzheimer's Disease Neuroimaging Initiative\*

1. Centre de Recherche de l'Institut Universitaire de Gériatrie de Montréal, Montréal, CA
2. Douglas Hospital Research Centre, McGill University, Montréal, CA
3. McGill University, Montréal, CA
4. Département d'Informatique et de recherche opérationnelle, Université de Montréal, Montréal, CA
5. Centre de Recherche de l'Institut Universitaire en Santé Mentale de Montréal, Montréal, CA
6. Département de Psychiatrie, Université de Montréal, Montréal, CA

\*Data used in preparation of this article were obtained from the Alzheimer's Disease Neuroimaging Initiative (ADNI) database ([adni.loni.usc.edu](http://adni.loni.usc.edu)). As such, the investigators within the ADNI contributed to the design and implementation of ADNI and/or provided data but did not participate in analysis or writing of this report. A complete listing of ADNI investigators can be found at: [http://adni.loni.usc.edu/wp-content/uploads/how\\_to\\_apply/ADNI\\_Acknowledgement\\_List.pdf](http://adni.loni.usc.edu/wp-content/uploads/how_to_apply/ADNI_Acknowledgement_List.pdf)

†Corresponding authors:

[angela.tam@mail.mcgill.ca](mailto:angela.tam@mail.mcgill.ca)

[pierre.bellec@criugm.qc.ca](mailto:pierre.bellec@criugm.qc.ca)

4545 Queen Mary Rd

Montreal QC

Canada H3W 1W6

## Abstract

1  
2  
3 30 Patients with mild cognitive impairment (MCI) are at risk of progressing to Alzheimer's  
4 dementia, yet only a fraction of them do. We explore here whether a very high-risk MCI  
5 subgroup can be identified using cognitive assessments and structural neuroimaging. A  
6 32 multimodal signature of Alzheimer's dementia was first extracted using machine learning  
7 tools in the ADNI1 sample, and was comprised of cognitive deficits across multiple domains  
8 as well as atrophy in temporal, parietal and occipital regions. We then validated the predictive  
9 value of this signature on two MCI cohorts. In ADNI1 (N=235), the presence of the signature  
10 predicted progression to dementia over three years with 80.4% positive predictive value,  
11 34 adjusted for a "typical" MCI baseline rate of 33% (95.6% specificity, 55.1% sensitivity).  
12 These results were replicated in ADNI2 (N=235), with 87.8% adjusted positive predictive  
13 value (96.7% specificity, 47.3% sensitivity). Our results demonstrate that, even for widely  
14 used markers, marked improvement in positive predictive value over the literature can be  
15 36 achieved by focusing on a subgroup of individuals with similar brain characteristics. The  
16 signature can be readily applied for the enrichment of clinical trials.  
17  
18 38  
19  
20  
21  
22 40  
23  
24  
25  
26 42  
27  
28  
29  
30

## 44 Keywords

31  
32 Alzheimer's disease, mild cognitive impairment, machine learning, neuroimaging, cognition  
33  
34  
35  
36  
37  
38  
39  
40  
41  
42  
43  
44  
45  
46  
47  
48  
49  
50  
51  
52  
53  
54  
55  
56  
57  
58  
59  
60  
61  
62  
63  
64  
65

## 46 Introduction

1 Alzheimer's disease (AD), a leading cause of dementia, is marked by the abnormal  
2  
3 accumulation of amyloid  $\beta$  ( $A\beta$ ) and hyperphosphorylated tau proteins in the brain, which  
4 48  
5 leads to widespread neurodegeneration. AD has a long prodromal phase, and it has been  
6  
7 difficult to predict which individuals will decline and experience AD dementia. While mild  
8 50  
9 cognitive impairment (MCI) is often considered a prodromal stage of AD, only a fraction (up  
10  
11 to 36%) of MCI patients will develop dementia within two years [1]. Identifying MCI  
12 52  
13 patients who will progress to AD dementia with enough specificity has been a challenge for  
14  
15 clinical trials, where the inclusion criteria for MCI subjects have had low to moderate positive  
16 54  
17 predictive value (PPV) [2]. This lack of prognostic power may be due to individual  
18  
19 variability. Different clinical phenotypes have been described where patients will exhibit  
20 56  
21 distinct cognitive deficits [3]. Previous work has also characterized neuropathological  
22  
23 subtypes based on the distribution of neurofibrillary tangles [4], which correspond well to  
24 58  
25 distinct patterns of brain atrophy [5]. Different subtypes of brain atrophy have also been  
26  
27 associated with different rates of progression to dementia [6]. The implications for prognosis  
28 60  
29 are profound: only a subgroup of patients will have clinical trajectories that can be reliably  
30  
31 predicted. We therefore propose to identify a subset of individuals with a homogenous  
32 62  
33 signature of brain atrophy and cognitive deficits who will progress to AD dementia with high  
34  
35 precision.  
36 64

36  
37 There is a large field focused on using machine learning to automatically detect MCI  
38 66  
39 patients who will progress to AD dementia based on imaging and cognitive features. For  
40  
41 models combining structural MRI and cognition, in terms of accuracy, the best has been  
42 68  
43 reported at 79% (76% specificity, 83% sensitivity) [7]. The state-of-the-art, which used  $A\beta$   
44  
45 positron emission tomography scans, has so far achieved 82% accuracy (87% specificity,  
46 70  
47 71% sensitivity) [8]. Note that accuracy is defined as the proportion of subjects that were  
48  
49 correctly identified, either as positives or negatives. PPV, on the other hand, is defined as the  
50 72  
51 proportion of true positives out of all subjects that were classified as positive. A model can  
52  
53 have high accuracy yet moderate PPV if the proportion of true positives is low relative to true  
54 74  
55 negatives. In the case of predicting incipient AD, relatively few MCI subjects progress to  
56  
57 dementia. Despite promising accuracy, the PPVs of models predicting AD progression remain  
58 76  
59 moderate, ranging from 50 to 75% across the literature [9]. This implies that up to half of  
60  
61 subjects who were identified as progressors by published algorithms did not actually progress  
62  
63  
64  
65

78 to dementia. It seems that by focussing our efforts on improving accuracy, we have a reached  
1 a plateau in generating models with good precision. We therefore aimed to create a predictive  
2  
3  
4 80 model that was optimized for high PPV.

5  
6 In this work, we developed a multimodal signature that is highly predictive of  
7  
8 82 progression to AD dementia in a subgroup of MCI patients, based on cognition and subtypes  
9  
10 of grey matter atrophy. We also aimed to evaluate the complementarity of features derived  
11  
12 84 from cognition and atrophy patterns. Although this has been extensively studied for prognosis  
13  
14 of dementia in a general MCI population, the complementarity of these measures is not  
15  
16 86 documented in the specific context of a high risk signature. We applied a cluster analysis on  
17  
18 structural magnetic resonance images to identify subtypes of brain atrophy in a sample  
19  
20 88 containing both patients with AD dementia and cognitively normal (CN) individuals. We then  
21  
22 used a two-step machine learning algorithm [9] to train a model to identify three signatures  
23  
24 90 that were highly predictive of AD dementia: 1) an anatomical signature, 2) a cognitive  
25  
26 signature, 3) a multimodal anatomical and cognitive signature. After identifying MCI patients  
27  
28 92 carrying these signatures, we examined cognitive decline,  $A\beta$  and tau burden, and  
29  
30 progression to dementia in these individuals to explore whether a highly predictive signature  
31  
32 94 represented a prodromal stage of AD. We analysed whether these three signatures identified  
33  
34 separate subgroups of subjects and how they performed against each other in terms of PPV,  
35  
36 96 specificity, and sensitivity at identifying progressors.

## 38 **Materials and methods**

### 40 98 **Data**

41  
42 Data used in the preparation of this article were obtained from the Alzheimer's  
43  
44 100 Disease Neuroimaging Initiative (ADNI) database (adni.loni.usc.edu). The ADNI was  
45  
46 launched in 2003 as a public-private partnership, led by Principal Investigator Michael W.  
47  
48 102 Weiner, MD. The primary goal of ADNI has been to test whether serial magnetic resonance  
49  
50 imaging (MRI), positron emission tomography (PET), other biological markers, and clinical  
51  
52 104 and neuropsychological assessment can be combined to measure the progression of mild  
53  
54 cognitive impairment (MCI) and early Alzheimer's disease (AD). For up-to-date information,  
55  
56 106 see [www.adni-info.org](http://www.adni-info.org).

1 We took baseline T1-weighted MRI scans from the ADNI1 (228 CN, 397 MCI, 192  
2 108 AD) and ADNI2 (218 CN, 354 MCI, 103 AD) studies. For a detailed description of MRI  
3 acquisition details, see <http://adni.loni.usc.edu/methods/documents/mri-protocols/>. All  
4 subjects gave informed consent to participate in these studies, which were approved by the  
5 110 research ethics committees of the institutions involved in data acquisition. Consent was  
6 obtained for data sharing and secondary analysis, the latter being approved by the ethics  
7 committee at the CRIUGM. For the MCI groups, each individual must have had at least 36  
8 months of follow-up for inclusion in our analysis. We also further stratified the MCI groups  
9 112 into stable (sMCI), who never received any change in their diagnosis, and progressors  
10 (pMCI), who received a diagnosis of AD dementia within 36 months of follow-up. pMCI  
11 who progressed to AD dementia after 36 months were excluded. After applying these  
12 inclusion/exclusion criteria, we were left with 280 and 268 eligible MCI subjects in ADNI1  
13 114 and ADNI2 respectively.

## 26 120 **Structural features from voxel-based morphometry**

29 Images were processed with the NeuroImaging Analysis Kit (NIAK) version 0.18.1  
30 122 (<https://hub.docker.com/r/simexp/niak-boss/>), the MINC toolkit (<http://bic-mni.github.io/>)  
31 version 0.3.18, and SPM12 (<http://www.fil.ion.ucl.ac.uk/spm/software/spm12/>) under  
32 CentOS with Octave (<http://gnu.octave.org>) version 4.0.2. Preprocessing of MRI data was  
33 124 executed in parallel on the Cedar supercomputer (<https://docs.computecanada.ca/wiki/Cedar>),  
34 using the Pipeline System for Octave and Matlab (PSOM) [10]. Each T1 image was linearly  
35 126 co-registered to the Montreal Neurological Institute (MNI) ICBM152 stereotaxic symmetric  
36 template [11], using the CIVET pipeline [12], and then re-oriented to the AC-PC line. Each  
37 image was segmented into grey matter, white matter, and CSF probabilistic maps. The  
38 128 DARTEL toolbox [13] was used to normalize the grey matter segmentations to a predefined  
39 grey matter template in MNI152 space. Each map was modulated to preserve the total amount  
40 of signal and smoothed with with a 8 mm isotropic Gaussian blurring kernel. After quality  
41 control of the normalized grey matter segmentations, we were left with 621 subjects in  
42 130 ADNI1 (out of 700, 88.7% success rate) and 515 subjects in ADNI2 (out of 589, 87.4%  
43 success rate).

57 136 We extracted subtypes to characterize variability of grey matter distribution with the  
58 CN and AD samples from ADNI1. In order to reduce the impact of factors of no interest that



138 may have influenced the clustering procedure, we regressed out age, sex, mean grey matter  
1 volume (GMV), and total intracranial volume (TIV), using a mass univariate linear regression  
2 model at each voxel. We then derived a spatial Pearson's correlation coefficient between all  
3  
4 140 pairs of individual maps after confound regression. This defined a subject x subject (377 x  
5  
6  
7 142 377) similarity matrix which was entered into a Ward hierarchical clustering procedure  
8  
9 (Figure 1a). Based on visual inspection of the similarity matrix, we identified 7 subgroups  
10 (Figure 1b). Each subtype was defined as the average map of each subgroup. For each  
11 144 subject, we computed spatial correlations between their map and each subtype, which we call  
12  
13 weights (Figure 1a). The weights formed a n subject x n subtypes matrix, which was included  
14  
15 146 in the feature space for all predictive models including VBM throughout this work. As in our  
16  
17 previous works [9,14], we chose to use weights, which can be interpreted as continuous  
18  
19 148 measures for subtype affinity, over discrete subtype membership because the latter is less  
20  
21 informative as most individuals express similarity to multiple subtypes [15]. Note that  
22  
23 150 although we chose to present our findings with 7 subtypes, we examined how the number of  
24  
25 subtypes may impact our subsequent predictions. There was no significant difference in  
26  
27 152 model performance when we changed the number of subtypes (see Table S1 in supplementary  
28  
29 material).  
30 154  
31  
32  
33

### 34 **Cognitive features**

35  
36 156 We took baseline neuropsychological scores for each subject from several cognitive  
37 domains: memory from the composite score ADNI-MEM [16], executive function from the  
38 composite score ADNI-EF [17], language from the Boston Naming Test (BNT), visuospatial  
39  
40 158 from the clock drawing test, and global cognition from the Alzheimer's Disease Assessment  
41 Scale-Cognitive (ADAS13). We chose measures that span multiple cognitive domains as it  
42  
43 has been suggested that the use of a combination of neuropsychological measures is likely the  
44 160 best approach to predicting incipient dementia [18]. These scores were included as features  
45  
46 for the predictive models involving cognition. Thirteen subjects across both ADNI1 and  
47  
48 162 ADNI2 (8 AD, 5 MCI) had to be excluded due to missing values in their cognitive  
49  
50 assessments. See Table 1 for demographic information of subjects who were included in  
51  
52 164 analyses.  
53  
54  
55  
56 166  
57  
58  
59  
60  
61  
62  
63  
64  
65

## Prediction of easy AD dementia cases in ADNI1

We trained a linear support vector machine (SVM) model with a linear kernel, as implemented by Scikit-learn [19] version 0.18 to classify AD vs CN from ADNI1 to get a baseline prediction accuracy. A tenfold cross-validation loop was used to estimate the performance of the trained model. Classes were balanced inversely proportional to class frequencies in the input data for the training. A nested cross-validation loop (stratified shuffle split with 50 splits and 20% test size) was used for the grid search of the hyperparameter  $C$  (grid was  $10^{-2}$  to  $10^1$  with 15 equal steps). We randomly selected subsamples of the dataset (retaining 50% of participants in each subsample) to replicate the SVM training 500 times. For each 50% subsample, a separate SVM model was trained to predict AD or CN in ADNI1. Predictions were made on the remaining 50% of the sample that was not used for training. For each subject, we calculated a hit probability defined as the frequency of correct classification across all SVM replications in which the test set contained that subject. Easy AD cases were defined as individuals with 100% hit probabilities with the AD label. Next, we trained a logistic regression classifier [20], with L1 regularization on the coefficients, to predict the easy AD cases. A stratified shuffle split (500 splits, 50% test size) was used to estimate the performance of the model for the grid search of the hyperparameter  $C$  (grid was  $10^{-2}$  to  $10^1$  with 15 equal steps). See [9] for more information about this two-step prediction. We used the whole CN and AD sample from ADNI1 to obtain three highly predictive signatures (HPS), one using VBM subtypes (VBM only), one using cognitive features (COG only), and one using the combination of VBM and cognitive features (VCOG). In all three signatures, age, sex, mean GMV, and TIV were also included as features.

## Prediction of progression to AD dementia from the MCI stage in ADNI1

The logistic regression trained on AD vs CN was used to identify MCI patients who have a HPS of AD dementia in ADNI1. We re-trained our models on AD vs CN after optimizing our hyperparameters (resampling size and resampling ratio) in order to maximize specificity and PPV while keeping a minimum of 30% sensitivity for our classification of sMCI (n=89) vs pMCI (n=155) in ADNI1. This was done for all three signatures. In brief, we

1  
2 196 used the AD and CN sample from ADNI1 as a training set, the MCI subjects from ADNI1 as  
3  
4  
5  
6 a validation set, and ADNI2 served as our test set.

### 7 8 198 **Statistical test of differences in model performance**

9  
10 We used Monte-Carlo simulations to generate confidence intervals on the  
11 200 performance (i.e. PPV, specificity and sensitivity) of both base SVM and HPS models for  
12 their predictions of AD vs CN and pMCI vs sMCI. Taking the observed sensitivity and  
13 specificity, and using similar sample sizes to our experiment, we replicated the number of  
14 true and false positive detection 100000 times using independent Bernoulli variables, and  
15 202 derived replications of PPV, specificity and sensitivity. By comparing these replications to the  
16 sensitivity, specificity and PPV observed in both models, we estimated a p-value for  
17 differences in model performance [21]. A p-value smaller than 0.05 was interpreted as  
18 evidence of a significant difference in performance, and 0.001 as strong evidence. We also  
19 204 used this approach to compare the performance of the combined features (VCOG) to the  
20 models containing VBM features or cognitive features only. Note that, based on our  
21 hypotheses regarding the behaviour of the HPS model, the tests were one-sided for increased  
22 specificity and PPV, and one-sided for decreased sensitivity.  
23 206  
24  
25  
26  
27 208  
28  
29  
30  
31 210  
32  
33

### 34 35 **Statistical tests of association of progression, AD biomarkers, and risk factors in** 36 212 **HPS+ MCI subjects**

37  
38 Based on the classifications resulting from the base SVM and HPS models, we  
39 separated the MCI subjects into three different groups: 1) HPS+, subjects who were selected  
40 214 by the HPS model as hits, 2) Non-HPS+, subjects who were selected by the base SVM model  
41 as hits but were not selected by the HPS model, and 3) Negative, subjects who were not  
42 216 selected as hits by either algorithm.  
43  
44  
45  
46  
47

48 218 We tested statistically if the HPS+ subgroup was enriched for progression to  
49 dementia, APOE4 carriers, females, and subjects who were positive for A $\beta$  and tau pathology.  
50 Positivity of AD pathology was determined by CSF measurements of A $\beta$  1-42 peptide and  
51 220 total tau with cut-off values of less than 192 pg/mL and greater than 93 pg/mL respectively  
52 [22]. We implemented Monte-Carlo simulations, where we selected 100000 random  
53 subgroups out of the original MCI sample. By comparing the proportion of progressors,  
54  
55  
56 222  
57  
58  
59  
60  
61  
62  
63  
64  
65

224 APOE4 carriers, females,  $A\beta$ -positive, and tau-positive subjects in these null replications to  
1 the actual observed values in the HPS subgroup, we estimated a p-value [21] (one sided for  
2 increase). A p-value smaller than 0.05 was interpreted as evidence of a significant  
3  
4 226 enrichment, and 0.001 as strong evidence.  
5  
6

7 228 One-way ANOVAs were used to evaluate differences between the HPS groupings  
8 with respect to age. Post-hoc Tukey's HSD tests were done to assess pairwise differences  
9  
10 among the three classes (HPS+, Non-HPS+, Negative). These tests were implemented in  
11 230 Python with the SciPy library [23] version 0.19.1 and StatsModels library [24] version 0.8.0.  
12  
13

14 232 To explore the impact of HPS grouping on cognitive trajectories, linear mixed effects  
15 models were performed to evaluate the main effects of and interactions between the HPS  
16  
17 groups and time on ADAS13 scores up to 36 months of follow-up. The models were first fit  
18 234 with a random effect of participant and then were fit with random slopes (time | participant) if  
19 ANOVAs comparing the likelihood ratio suggested a significant improvement in model fit.  
20  
21 All tests were performed separately on the ADNI1 and ADNI2 datasets. These tests were  
22 236 implemented in R version 3.3.2 with the library nlme version 3.1.128 [25].  
23  
24  
25  
26  
27  
28  
29  
30

### 31 **Public code and data availability**

32 240 The code used in this experiment is available on a GitHub repository  
33 ([https://github.com/SIMEXP/vcog\\_hps\\_ad](https://github.com/SIMEXP/vcog_hps_ad)) and zenodo  
34  
35 (<https://doi.org/10.5281/zenodo.1444081>).  
36 242

37  
38 We shared a notebook replicating all the machine learning experiments, starting after  
39  
40 244 the generation of VBM subtypes. However, in order to protect the privacy of the study  
41 participants, we could not share individual subtype weights alongside other behavioural data  
42 and diagnostic information. We thus created parametric (Gaussian) bootstrap simulations,  
43 246 based on group statistics alone, that will allow interested readers to replicate results similar to  
44 those presented in this manuscript, using the exact same code and computational environment  
45  
46 that were used on real data, but with purely synthetic data instead. The notebook can be  
47 248 executed online via the binder platform (<http://mybinder.org>), and runs into a docker  
49 container  
50  
51 ([https://mybinder.org/v2/gh/HanadS/vcog\\_hps\\_ad/master?filepath=%2Fvcog\\_hpc\\_prediction  
52 250 simulated\\_data.ipynb](https://mybinder.org/v2/gh/HanadS/vcog_hps_ad/master?filepath=%2Fvcog_hpc_prediction_simulated_data.ipynb)), built from a configuration file that is available on GitHub  
53  
54  
55  
56  
57  
58  
59  
60  
61  
62  
63  
64  
65

254 ([https://github.com/SIMEXP/vcog\\_hps\\_ad/blob/master/Dockerfile](https://github.com/SIMEXP/vcog_hps_ad/blob/master/Dockerfile)). The container itself is  
1 available on Docker Hub ([https://hub.docker.com/r/simexp/vcog\\_hps\\_ad/](https://hub.docker.com/r/simexp/vcog_hps_ad/)). The simulated  
2  
3  
4 256 data was archived on figshare  
5  
6 ([https://figshare.com/articles/Simulated\\_cognitive\\_and\\_structural\\_MRI\\_data\\_from\\_ADNI/71](https://figshare.com/articles/Simulated_cognitive_and_structural_MRI_data_from_ADNI/7132757)  
7 258 [32757](https://figshare.com/articles/Simulated_cognitive_and_structural_MRI_data_from_ADNI/7132757)).

9 The simulation included the following 16 variables: age, sex, mean grey matter  
10  
11 260 volume, total intracranial volume, 5 cognitive assessment scores and 7 VBM subtype weights  
12  
13 from both ADNI1 and ADNI2. Subjects that had missing values for these variables were  
14  
15 262 discarded from the simulation, leaving N=1115 subjects. We stratified the population into 12  
16  
17 subgroups: the four clinical labels (AD, pMCI, sMCI, CN), each further subdivided by the  
18  
19 264 three prediction subclasses identified in this paper (Negative, Non-HPS+, HPS+). For each  
20  
21 subgroup, we estimated the average and covariance matrices between the 16 variables of  
22  
23 266 interest. We then generated a number of multivariate normal data points that matched the  
24  
25 number of subjects found in each subgroup, using the empirical mean and covariance matrix  
26  
27 268 of each subgroup. Finally, the range of the simulated data was clipped to the range of the  
28  
29 original real data, and the simulated sex data points were binarized by nearest neighbour.

30 270 The statistics from the predictive model in the original implementation are similar to  
31  
32 that of the simulated data. The model predicted the progression of dementia from MCI in  
33  
34 272 ADNI1 with a PPV of 93.1% (specificity of 93.2%) on real data. This coincides with a 93.3%  
35  
36 PPV (specificity of 94.3% ) that we get when using the simulated data. Similarly, with the  
37  
38 274 ADNI2 dataset the model achieved a 81.3% PPV (specificity of 96.7%) from the real data  
39  
40 and a 75.7% PPV (specificity of 95.0%) from the simulated data.  
41  
42  
43

## 44 276 **Results**

### 45 46 **Prediction of AD dementia vs cognitively normal individuals** 47

48 278 The SVM model trained using the VCOG features achieved 94.5% PPV (95.6%  
49  
50 specificity, 93.9% sensitivity) when classifying AD vs CN in ADNI1. Such high performance  
51  
52 280 was expected given the marked cognitive deficits associated with clinical dementia. COG  
53  
54 features only actually reached excellent performance as well (97.6% PPV, 98.0% specificity,  
55  
56 282 96.4% sensitivity), while using VBM features only yielded markedly lower performances  
57  
58 (86.4% PPV, 89.3% specificity, 79.6% sensitivity) (see Figure 2a). Note that the performance  
59  
60  
61  
62  
63  
64  
65

284 metrics in ADNI1 were estimated through cross-validation, and represent an average  
1 performance for several models trained on different subsets of ADNI1. We then trained a  
2  
3  
4 286 model on all of ADNI1, and estimated its performance on an independent dataset, ADNI2.  
5  
6 Using VCOG predictors, the ADNI1 model reached 92.0% PPV (96.3% specificity, 92.0%  
7  
8 288 sensitivity), when applied on ADNI2 AD vs CN data. Again the performance was comparable  
9  
10 with COG predictors only (92.2% PPV, 96.3% specificity, 94.3% sensitivity), and lower  
11  
12 290 performance with VBM features only (57.3% PPV, 79.8% specificity, 56.7% sensitivity) (see  
13  
14 Figure 2a). Note that PPV is dependent on the proportion of patients and controls for a given  
15  
16 292 sensitivity and specificity. Since the ADNI2 sample had a substantially smaller proportion of  
17  
18 AD subjects compared to ADNI1, the resulting PPV was reduced. When we adjusted the  
19  
20 294 baseline rate of AD subjects in ADNI2 to the same rate in ADNI1, the PPVs were 95.2%,  
21  
22 95.3%, and 70.2% for the VCOG, COG, and VBM models respectively.  
23  
24

### 25 296 **Identification of easy AD cases for prediction**

26  
27 The VCOG HPS model achieved 99.2% PPV (99.5% specificity, 77.6% sensitivity) in  
28  
29 298 classifying easy AD subjects in ADNI1. These performance scores were estimated by  
30  
31 cross-validation of the entire two-stage process (training of SVM, estimation of hit  
32  
33 300 probability, identification of HPS). However, the hyperparameters of the two-stage model  
34  
35 were optimized on classifying pMCI vs sMCI in ADNI1, as described below. We next trained  
36  
37 302 a single model on all of ADNI1, which we applied on an independent sample (ADNI2). The  
38  
39 ADNI1 AD VCOG HPS model reached 98.6% PPV (99.5% specificity, 79.5% sensitivity) on  
40  
41 304 ADNI2. As was previously observed with the conventional SVM analysis, the VCOG HPS  
42  
43 model had similar performance to the COG HPS model (ADNI1: 100% PPV, 100%  
44  
45 306 specificity, 87.3% sensitivity; ADNI2: 98.7% PPV, 99.5% specificity, 88.6% sensitivity), and  
46  
47 outperformed the VBM HPS model (ADNI1: 92.3% PPV, 96.1% specificity, 54.6%  
48  
49 308 sensitivity; ADNI2: 65.2% PPV, 91.5% specificity, 33.3% sensitivity), see Figure 2a. When  
50  
51 adjusted to the same baseline rate of AD subjects as ADNI1, the PPVs in ADNI2 were  
52  
53 310 99.2%, 99.3%, and 76.7% for the VCOG, COG, and VBM HPS models respectively.  
54

55  
56 312 The HPS models consistently outperformed the base SVM classifiers with respect to  
57  
58 specificity ( $p < 0.001$ ) in the classifications of AD vs CN and pMCI vs sMCI in both ADNI1  
59  
60 314 PPV ( $p < 0.05$ ) adjusted for a typical prevalence of 33.6% pMCI in a given sample of MCI  
61  
62  
63  
64  
65

1 subjects [26]. However, these increases in specificity and PPV for the HPS model came at a  
2 316 significant cost of reduced sensitivity compared to the base classifier, across all models in  
3  
4 both ADNI1 and ADNI2 ( $p < 0.05$ ) (Figure 2). Note that this shift towards lower sensitivity  
5  
6 318 and higher specificity and PPV could be achieved by adjusting the threshold of the SVM  
7  
8 analysis (see ROC analysis, Figure S1 in supplementary material), and is not unique to the  
9  
10 320 two-stage procedure we implemented.

### 11 12 13 **High confidence prediction of progression to AD dementia**

14  
15 322 When using the full VCOG features, 87 MCI patients were selected as HPS+ in  
16  
17 ADNI1, out of which 81 (93.1% PPV) were pMCI within 36 months of follow-up. This  
18  
19 324 represented a large, significant increase over the baseline rate of progressors in the entire  
20  
21 ADNI1 MCI sample (37.4%) ( $p < 0.001$ ). This was also a significant increase over the SVM's  
22  
23 326 predictions, where 83.9% of subjects that it had labeled as hits were true progressors  
24  
25 ( $p < 0.001$ ). When adjusted to a 33.6% baseline rate of progressors, more typical of MCI  
26  
27 328 populations, the PPV of HPS+ for prognosis of dementia was 80.4% (93.2% specificity,  
28  
29 55.1% sensitivity).

30  
31 330 We replicated these analyses in the MCI sample from ADNI2 ( $N = 235$ ). Using VCOG  
32  
33 features, 32 subjects were identified as HPS+, 26 of which progressed to AD dementia within  
34  
35 332 36 months follow-up (81.2% PPV, specificity of 96.7%, sensitivity of 47.3%, 87.8% PPV  
36  
37 adjusted to a 33.6% baseline rate). This represented a significantly higher prevalence than the  
38  
39 334 30.6% baseline rate in the entire ADNI2 MCI cohort ( $p < 0.001$ ). This was also a significant  
40  
41 increase over the SVM's predictions, where 67.8% of subjects it had labeled as hits were true  
42  
43 336 progressors ( $p < 0.001$ ). As expected, the HPS+ model had lower sensitivity and higher  
44  
45 specificity/PPV than the baseline model, both in ADNI1 and ADNI2, and for all three feature  
46  
47 338 sets (VBM, COG and VCOG), see Figure 2b. The VCOG features also lead to higher PPV  
48  
49 than VBM and COG features taken independently, both in ADNI1 and ADNI2. That increase  
50  
51 340 was large and significant between VCOG and VBM (up to 17%) and marginal and  
52  
53 non-significant between VCOG and COG (up to 8%), see Figure 2b.

### 54 55 56 342 **Characteristics of MCI subjects with a highly predictive VCOG signature of AD**

HPS+ MCI subjects with the VCOG signature were more likely to be progressors (Figure 3a) compared to non-HPS+ subjects and negative subjects (ADNI1:  $p < 0.001$ ; ADNI2:  $p < 0.001$ ). HPS+ MCI subjects were also more likely to be APOE4 carriers (Figure 3b) (ADNI1:  $p < 0.005$ ; ADNI2:  $p < 0.05$ ). There was no difference in sex across the HPS groupings in the MCI subjects of either the ADNI1 or ADNI2 cohorts (Figure 3c). This was consistent with the whole sample, where there were equal proportions of progressors across both sexes in each dataset (ADNI1:  $\chi^2 = 0.015$ ,  $p = 0.90$ ; ADNI2:  $\chi^2 = 0.0002$ ,  $p = 0.99$ ). The HPS+ class was also significantly enriched for A $\beta$ -positive subjects in ADNI1 ( $p < 0.05$ ). However, this result was not replicated in the ADNI2 MCI subjects (Figure 3d). Similarly with tau, we found a significant increase in tau-positive subjects in the HPS+ group of ADNI1 ( $p < 0.05$ ), but not in ADNI2 (Figure 3e). We found a significant age difference across the HPS classes in ADNI2 ( $F = 5.68$ ,  $p < 0.005$ ), where the HPS+ subjects were older than the Negative subjects by a mean of 4.4 years. However, age did not differ across the HPS classes in ADNI1 (Figure 3f). Finally, HPS+ subjects had significantly steeper cognitive declines compared to the Non-HPS+ and Negative groups (Figure 3g): there were significant interactions between the HPS groupings and time in ADNI1: (HPS+  $\beta = -0.147$ ,  $t = -7.56$ ,  $p < 0.001$ ; Non-HPS+  $\beta = -0.055$ ,  $t = -2.46$ ,  $p < 0.05$ ) and ADNI2 (HPS+  $\beta = -0.194$ ,  $t = -8.69$ ,  $p < 0.001$ ; Non-HPS+  $\beta = -0.072$ ,  $t = -3.31$ ,  $p = 0.001$ ). The HPS+ in ADNI1 and ADNI2 respectively gained 1.8 and 2.3 more points each year on the ADAS13 compared to the Non-HPS+ and Negative groups. Note that higher scores on the Alzheimer's Disease Assessment Scale - Cognitive subscale (13 items) (ADAS13) represent worse cognitive function.

### COG, VBM and VCOG signatures

The COG signature was mainly driven by scores from the ADAS13, which measures overall cognition, ADNI-MEM, a composite score that measures memory [16], and ADNI-EF, a composite score that measures executive function [27] (coefficients were 5.49, -4.80 and -2.50 respectively). In this model, sex, age, mean GMV, and TIV contributed very little, relative to the cognitive features (Figure 4b). Note that these coefficients should be interpreted as pseudo z-scores as the features had been normalized to zero mean and unit variance.



1  
2 374 Almost all grey matter subtypes contributed to the VBM signature. Mean GMV,  
3  
4 and 3.98 respectively) (Figure 4c). Subtype 1 was characterized by reduced relative GMV in  
5  
6 376 the occipital, parietal and posterior temporal lobes. Subtype 6 was characterized by reduced  
7  
8 relative GMV in the temporal lobes, notably the medial temporal regions. We had anticipated  
9  
10 378 the larger contribution of these two subtypes as they have been described in previous AD  
11  
12 subtyping work [5,28–30]. Diagnosis (CN, sMCI, pMCI, AD) accounted for a substantial  
13  
14 380 amount of variance in these subtype weights (subtype 1:  $F=8.51$ ,  $p<0.001$ ; subtype 2:  
15  
16  $F=34.27$ ,  $p<0.001$ ). Post-hoc t-tests showed AD subjects had significantly higher weights  
17  
18 382 compared to CN (Figure 1), making these subtypes associated with a diagnosis of AD  
19  
20 (subtype 1:  $t=2.88$ ,  $p<0.05$ ; subtype 6:  $t=7.68$ ,  $p<0.001$ ).

21 384 The ADAS13, memory (ADNI-MEM) and executive function (ADNI-EF) scores  
22  
23 contributed the most to the VCOG HPS signature (coefficients were 6.27, -7.43 and -3.95  
24  
25 386 respectively, Figure 4a). Of the VBM features, subtypes 2, 3 and 7 contributed the most to the  
26  
27 signature (coefficients were 1.36, -2.12 and -2.83 respectively). Subtypes 1 and 6, which had  
28  
29 388 the highest positive weights in the VBM model, were given marginal weights in the VCOG  
30  
31 model, which is potentially indicative of redundancy with COG features. Subtype 2, which  
32  
33 390 was associated with AD, was characterized by greater relative GMV in medial parts of the  
34  
35 parietal and occipital lobes and the cingulate cortex, but less GMV everywhere else. Subtype  
36  
37 392 3 was characterized by greater relative GMV in the temporal lobes, insula and striatum.  
38  
39 Subtype 7, which was associated with healthy controls, was characterized by greater relative  
40  
41 394 GMV in the parietal, occipital and temporal lobes. Note that the weights for subtypes 3 and 7  
42  
43 were negative in the model, which means that predicted AD and pMCI cases had brain  
44  
45 396 atrophy patterns that were spatially dissimilar to those subtypes.

## 47 48 Discussion

49  
50 398 We developed a highly precise and specific MRI and cognitive-based model to predict  
51  
52 AD dementia. Our two-stage predictive model reached 93.2% specificity and 93.1% PPV  
53  
54 400 (80.4% when adjusted for 33.6% prevalence of progressors) in ADNI1 when classifying  
55  
56 progressor vs stable MCI patients (within 3 years follow-up). We replicated these results in  
57  
58 402 ADNI2 where the model reached 96.7% specificity and 81.2% PPV (87.8% adjusted PPV).

1  
2 404 With respect to specificity and PPV, these results are a substantial improvement over previous  
3 works combining structural MRI and cognition on the same prediction task, that have  
4 reported up to 76% specificity and 65% PPV (adjusted for 33.6% prevalence of progressors)  
5 [7]. We also report the highest PPV compared to the current state-of-the-art predictive model  
6 406 using  $A\beta$  PET scans, which reported 74% (adjusted) PPV [8]. Finally, our results also  
7 reproduced our past work which developed a model that optimizes specificity and PPV [9].  
8  
9 408 Our performance is close to the 90% PPV reported by [9], which used a combination of  
10 structural and functional MRI measures and a two-stage predictive model, with the limitation  
11 of a smaller sample size (N=56 MCI patients) due to limited availability of functional MRI  
12 data in ADNI.  
13 410  
14  
15  
16  
17 412

18  
19 An ideal model to predict conversion to AD dementia would have both high  
20 sensitivity and specificity. However, the pathophysiological heterogeneity of clinical  
21 414 diagnosis will prevent highly accurate prediction linking brain features to clinical trajectories.  
22 We argue that, faced with heterogeneity, it is necessary to sacrifice sensitivity to focus on a  
23 subgroup of individuals with similar brain abnormalities. The high specificity of our  
24 416 two-stage model indeed came at a cost of reduced sensitivity (55.1% in ADNI1 and 47.3% in  
25 ADNI2 for classifying pMCI vs sMCI), which is much lower than sensitivity values of  
26 64%-95% reported by other groups [9]. The two-stage procedure, based on prediction  
27 stability, did not offer gains compared to a simpler SVM model, if the threshold of the SVM  
28 418 model could be selected *a priori* to match the specificity of the two-stage procedure (see  
29 ROC curves in Figure S1 in supplementary material). The two-stage prediction model offered  
30 the advantage of a principled approach to train the prediction model in a high-specificity  
31 regime, based on stability. The choice of a L1 regularized logistic regression also lead to a  
32 420 compact and interpretable subset of features for the HPS.  
33  
34  
35  
36 422  
37  
38  
39  
40 424  
41  
42  
43  
44 426

45 Favoring specificity over sensitivity is useful in settings where false positives need to  
46 be minimized and PPV needs to be high, such as expensive clinical trials. Here, with our HPS  
47 428 VCOG model, we report the highest PPVs for progression to AD from the MCI stage (up to  
48 87.8%, adjusted for 33.6% prevalence of progressors). Importantly, the proposed HPS+  
49 model used tools that are already widely used by clinicians. The present work could be used  
50 as a screening tool for recruitment in clinical trials that target MCI subjects who are likely to  
51 430 progress to dementia within three years. The implementation of an automated selection  
52 algorithm could also result in groups of MCI subjects with more homogeneous brain  
53  
54  
55 432  
56  
57  
58  
59 434  
60  
61  
62  
63  
64  
65

1  
2 436 pathology. However, we note that HPS+ subjects did not all present with significant amyloid  
3  
4  
5  
6 438 burden (92.0% and 68.4% of HPS+ subjects in ADNI1 and ADNI2 respectively, Figure 3),  
7  
8  
9  
10  
11  
12  
13  
14  
15  
16  
17 444 which means that not all HPS+ individuals are likely to have prodromal AD, even when  
18  
19  
20  
21 446 progressing to dementia.

22  
23  
24  
25 448 When we trained our model with cognitive features only, tests for general cognition,  
26  
27  
28  
29 450 memory, and executive function were chosen as the strongest predictors of AD dementia. Our  
30  
31  
32  
33 452 COG HPS model thus supports previous research that reported general cognition, memory,  
34  
35  
36 454 and executive function as important neuropsychological predictors of dementia [7,18,31,32].  
37  
38  
39  
40 456 Compared to the state-of-the-art multi-domain cognition-based predictive model, which  
41  
42  
43  
44 458 reported 87.1% specificity and 81.8% PPV (77.5% when adjusted to 33.6% pMCI  
45  
46  
47  
48 460 prevalence) [33], our COG HPS model achieved similar performance reaching between  
49  
50  
51  
52 462 87.5%-95% specificity and 72.3%-85.1% (adjusted) PPV. As general cognition was the  
53  
54  
55  
56 464 strongest feature in our model to predict progression, this supports previous findings that  
57  
58  
59  
60 466 MCI patients with deficits across multiple domains are at the highest risk for dementia  
61  
62  
63  
64  
65 [32,34].

66  
67  
68  
69  
70  
71  
72  
73  
74  
75  
76  
77  
78  
79  
80  
81  
82  
83  
84  
85  
86  
87  
88  
89  
90  
91  
92  
93  
94  
95  
96  
97  
98  
99  
100  
101  
102  
103  
104  
105  
106  
107  
108  
109  
110  
111  
112  
113  
114  
115  
116  
117  
118  
119  
120  
121  
122  
123  
124  
125  
126  
127  
128  
129  
130  
131  
132  
133  
134  
135  
136  
137  
138  
139  
140  
141  
142  
143  
144  
145  
146  
147  
148  
149  
150  
151  
152  
153  
154  
155  
156  
157  
158  
159  
160  
161  
162  
163  
164  
165  
166  
167  
168  
169  
170  
171  
172  
173  
174  
175  
176  
177  
178  
179  
180  
181  
182  
183  
184  
185  
186  
187  
188  
189  
190  
191  
192  
193  
194  
195  
196  
197  
198  
199  
200  
201  
202  
203  
204  
205  
206  
207  
208  
209  
210  
211  
212  
213  
214  
215  
216  
217  
218  
219  
220  
221  
222  
223  
224  
225  
226  
227  
228  
229  
230  
231  
232  
233  
234  
235  
236  
237  
238  
239  
240  
241  
242  
243  
244  
245  
246  
247  
248  
249  
250  
251  
252  
253  
254  
255  
256  
257  
258  
259  
260  
261  
262  
263  
264  
265  
266  
267  
268  
269  
270  
271  
272  
273  
274  
275  
276  
277  
278  
279  
280  
281  
282  
283  
284  
285  
286  
287  
288  
289  
290  
291  
292  
293  
294  
295  
296  
297  
298  
299  
300  
301  
302  
303  
304  
305  
306  
307  
308  
309  
310  
311  
312  
313  
314  
315  
316  
317  
318  
319  
320  
321  
322  
323  
324  
325  
326  
327  
328  
329  
330  
331  
332  
333  
334  
335  
336  
337  
338  
339  
340  
341  
342  
343  
344  
345  
346  
347  
348  
349  
350  
351  
352  
353  
354  
355  
356  
357  
358  
359  
360  
361  
362  
363  
364  
365  
366  
367  
368  
369  
370  
371  
372  
373  
374  
375  
376  
377  
378  
379  
380  
381  
382  
383  
384  
385  
386  
387  
388  
389  
390  
391  
392  
393  
394  
395  
396  
397  
398  
399  
400  
401  
402  
403  
404  
405  
406  
407  
408  
409  
410  
411  
412  
413  
414  
415  
416  
417  
418  
419  
420  
421  
422  
423  
424  
425  
426  
427  
428  
429  
430  
431  
432  
433  
434  
435  
436  
437  
438  
439  
440  
441  
442  
443  
444  
445  
446  
447  
448  
449  
450  
451  
452  
453  
454  
455  
456  
457  
458  
459  
460  
461  
462  
463  
464  
465  
466  
467  
468  
469  
470  
471  
472  
473  
474  
475  
476  
477  
478  
479  
480  
481  
482  
483  
484  
485  
486  
487  
488  
489  
490  
491  
492  
493  
494  
495  
496  
497  
498  
499  
500  
501  
502  
503  
504  
505  
506  
507  
508  
509  
510  
511  
512  
513  
514  
515  
516  
517  
518  
519  
520  
521  
522  
523  
524  
525  
526  
527  
528  
529  
530  
531  
532  
533  
534  
535  
536  
537  
538  
539  
540  
541  
542  
543  
544  
545  
546  
547  
548  
549  
550  
551  
552  
553  
554  
555  
556  
557  
558  
559  
560  
561  
562  
563  
564  
565  
566  
567  
568  
569  
570  
571  
572  
573  
574  
575  
576  
577  
578  
579  
580  
581  
582  
583  
584  
585  
586  
587  
588  
589  
590  
591  
592  
593  
594  
595  
596  
597  
598  
599  
600  
601  
602  
603  
604  
605  
606  
607  
608  
609  
610  
611  
612  
613  
614  
615  
616  
617  
618  
619  
620  
621  
622  
623  
624  
625  
626  
627  
628  
629  
630  
631  
632  
633  
634  
635  
636  
637  
638  
639  
640  
641  
642  
643  
644  
645  
646  
647  
648  
649  
650  
651  
652  
653  
654  
655  
656  
657  
658  
659  
660  
661  
662  
663  
664  
665  
666  
667  
668  
669  
670  
671  
672  
673  
674  
675  
676  
677  
678  
679  
680  
681  
682  
683  
684  
685  
686  
687  
688  
689  
690  
691  
692  
693  
694  
695  
696  
697  
698  
699  
700  
701  
702  
703  
704  
705  
706  
707  
708  
709  
710  
711  
712  
713  
714  
715  
716  
717  
718  
719  
720  
721  
722  
723  
724  
725  
726  
727  
728  
729  
730  
731  
732  
733  
734  
735  
736  
737  
738  
739  
740  
741  
742  
743  
744  
745  
746  
747  
748  
749  
750  
751  
752  
753  
754  
755  
756  
757  
758  
759  
760  
761  
762  
763  
764  
765  
766  
767  
768  
769  
770  
771  
772  
773  
774  
775  
776  
777  
778  
779  
780  
781  
782  
783  
784  
785  
786  
787  
788  
789  
790  
791  
792  
793  
794  
795  
796  
797  
798  
799  
800  
801  
802  
803  
804  
805  
806  
807  
808  
809  
810  
811  
812  
813  
814  
815  
816  
817  
818  
819  
820  
821  
822  
823  
824  
825  
826  
827  
828  
829  
830  
831  
832  
833  
834  
835  
836  
837  
838  
839  
840  
841  
842  
843  
844  
845  
846  
847  
848  
849  
850  
851  
852  
853  
854  
855  
856  
857  
858  
859  
860  
861  
862  
863  
864  
865  
866  
867  
868  
869  
870  
871  
872  
873  
874  
875  
876  
877  
878  
879  
880  
881  
882  
883  
884  
885  
886  
887  
888  
889  
890  
891  
892  
893  
894  
895  
896  
897  
898  
899  
900  
901  
902  
903  
904  
905  
906  
907  
908  
909  
910  
911  
912  
913  
914  
915  
916  
917  
918  
919  
920  
921  
922  
923  
924  
925  
926  
927  
928  
929  
930  
931  
932  
933  
934  
935  
936  
937  
938  
939  
940  
941  
942  
943  
944  
945  
946  
947  
948  
949  
950  
951  
952  
953  
954  
955  
956  
957  
958  
959  
960  
961  
962  
963  
964  
965  
966  
967  
968  
969  
970  
971  
972  
973  
974  
975  
976  
977  
978  
979  
980  
981  
982  
983  
984  
985  
986  
987  
988  
989  
990  
991  
992  
993  
994  
995  
996  
997  
998  
999  
1000

For our VBM model, we extracted a number of gray matter atrophy subtypes that recapitulated previously reported subtypes, namely the medial temporal lobe and parietal dominant subtypes [5,28–30], which were associated strongly with a diagnosis of AD dementia. Weights for the parietal dominant and medial temporal lobe subtypes (Subtypes 1 and 6 from Figure 1b, respectively) contributed substantially to the highly predictive signature in the VBM model. The atrophy pattern of subtype 6 is spatially similar to the spread of neurofibrillary tangles in Braak stages III and IV [35], which may support previous findings that tau aggregation mediates neurodegeneration [36]. The contributions of the parietal dominant and medial temporal lobe subtypes in the VBM model are also in line with previous works, which have reported that cortical thickness and volumes of the medial temporal lobes, inferior parietal cortex, and precuneus are strong predictors of progression to dementia [7,37].

1  
2 468 markers were stronger features, the VCOG model assigned large negative weights for the  
3 structural subtypes 3, which showed greater relative GMV in the temporal lobes, and 7,  
4 which showed greater relative GMV in the parietal, occipital, and temporal lobes. This means  
5  
6 470 that these features were predictive of stable MCI in the VCOG model, in line with previous  
7 work showing that atrophy in these regions is predictive of progression to dementia [7,37].  
8  
9 472 Furthermore, we demonstrated that combining MRI data with cognitive markers significantly  
10 improves upon a model based on MRI features alone. This result is again in line with the  
11 literature [7,38], yet was shown for the first time for a model specifically trained for high  
12  
13 474 PPV. Note that in the current study, the predictive model was trained exclusively on images  
14 acquired on 1.5T scanners from ADNI1. Good generalization to ADNI2 with 3T scanners  
15  
16 476 demonstrates robustness of imaging structural subtypes across scanner makes.

17  
18  
19  
20  
21 478 The VCOG highly predictive signature might reflect a late disease stage. We looked at  
22 the ratio of early to late MCI subjects in the ADNI2 sample (note that ADNI1 did not have  
23 early MCI subjects). Of the MCI subjects identified as HPS+ by the VCOG model, 84.4%  
24  
25 480 were late MCI subjects, compared to a rate of 34.9% of late MCI subjects in the entire  
26 ADNI2 MCI sample (Supplementary Figure S3). This approach may not be optimal for early  
27  
28 482 detection of future cognitive decline. Training a model to classify MCI progressors and  
29 non-progressors to dementia could be done in order to capture future progressors in earlier  
30  
31 484 preclinical stages (e.g. early MCI). Finally, we focused on structural MRI and  
32 neuropsychological batteries as features in our models due to their wide availability and  
33  
34 486 established status as clinical tools. However, we believe adding other modalities such as PET  
35 imaging, CSF markers, functional MRI, genetic factors, or lifestyle factors could result in  
36  
37 488 higher predictive power, especially at earlier preclinical stages of AD.  
38  
39  
40  
41  
42  
43  
44  
45

## 46 490 **Conclusion**

47  
48 In summary, we found a subgroup of patients with MCI who share a signature of  
49  
50 492 cognitive deficits and brain atrophy, that put them at very high risk to progress from MCI to  
51 AD dementia within a time span of three years. We validated the signature in two separate  
52  
53 494 cohorts that contained both stable MCI patients and MCI patients who progressed to  
54 dementia. The model was able to predict progression to dementia in MCI patients with up to  
55  
56 496 93.1% PPV and up to 96.7% specificity. The signature was present in about half of all  
57  
58  
59  
60  
61  
62  
63  
64  
65

1  
2 498 progressors, demonstrating that gains in PPV can be made by focusing on a homogeneous,  
3 yet relatively common subgroup. Our model could potentially improve subject selection in  
4 clinical trials and identify individuals at a higher risk of AD dementia for early intervention in  
5 500 clinical settings.  
6  
7  
8  
9

## 10 **Competing interests**

11 502 The authors declare no conflicts of interest.  
12  
13  
14

## 15 **Acknowledgments**

16  
17 504 We would like to thank Sylvia Villeneuve, Alexa Pichet-Binette and Jacob Vogel for  
18 providing us with data to help start our preliminary analyses for this project. We would like to  
19 thank Hien Nguyen for advising us on parts of the statistical analyses.  
20 506  
21  
22

23 Data collection and sharing for this project was funded by the Alzheimer's Disease  
24 508 Neuroimaging Initiative (ADNI) (National Institutes of Health Grant U01 AG024904) and  
25 DOD ADNI (Department of Defense award number W81XWH-12-2-0012). ADNI is funded  
26 by the National Institute on Aging, the National Institute of Biomedical Imaging and  
27 Bioengineering, and through generous contributions from the following: AbbVie,  
28 Alzheimer's Association; Alzheimer's Drug Discovery Foundation; Araclon Biotech;  
29 510 BioClinica, Inc.; Biogen; Bristol-Myers Squibb Company; CereSpir, Inc.; Cogstate; Eisai  
30 Inc.; Elan Pharmaceuticals, Inc.; Eli Lilly and Company; EuroImmun; F. Hoffmann-La Roche  
31 Ltd and its affiliated company Genentech, Inc.; Fujirebio; GE Healthcare; IXICO Ltd.;  
32 Janssen Alzheimer Immunotherapy Research & Development, LLC.; Johnson & Johnson  
33 512 Pharmaceutical Research & Development LLC.; Lumosity; Lundbeck; Merck & Co., Inc.;  
34 Meso Scale Diagnostics, LLC.; NeuroRx Research; Neurotrack Technologies; Novartis  
35 Pharmaceuticals Corporation; Pfizer Inc.; Piramal Imaging; Servier; Takeda Pharmaceutical  
36 Company; and Transition Therapeutics. The Canadian Institutes of Health Research is  
37 514 providing funds to support ADNI clinical sites in Canada. Private sector contributions are  
38 facilitated by the Foundation for the National Institutes of Health ([www.fnih.org](http://www.fnih.org)). The  
39 grantee organization is the Northern California Institute for Research and Education, and the  
40 516 study is coordinated by the Alzheimer's Therapeutic Research Institute at the University of  
41  
42  
43  
44 518  
45  
46  
47  
48  
49  
50  
51  
52 522  
53  
54  
55  
56 524  
57  
58  
59  
60  
61  
62  
63  
64  
65

1 Southern California. ADNI data are disseminated by the Laboratory for Neuro Imaging at the  
2 526 University of Southern California.

3  
4 The computational resources used to perform the data analysis were provided by  
5  
6 528 Compute Canada (www.computecanada.org). This project was funded by NSERC grant  
7  
8 number RN000028 and the Canadian Consortium on Neurodegeneration in Aging (CCNA,  
9  
10 530 www.ccna-ccnv.ca), through a grant from the Canadian Institutes of Health Research and  
11  
12 funding from several partners including SANOFI-ADVENTIS R&D. AT is supported by a  
13 532 bursary from the Centre de recherche de l'institut universitaire de gériatrie de Montréal and  
14  
15 the Courtois foundation. CD is supported by a salary award from the Lemaire foundation and  
16  
17 534 Courtois foundation. PB is supported by a salary award from Fonds de recherche du Québec  
18  
19 -- Santé and the Courtois foundation.  
20  
21  
22  
23  
24

## 25 536 **References**

- 26  
27  
28 1. Ward A, Tardiff S, Dye C, Arrighi HM. Rate of conversion from prodromal Alzheimer's  
29 538 disease to Alzheimer's dementia: a systematic review of the literature. *Dement Geriatr Cogn*  
30  
31 *Dis Extra*. 2013;3:320–32.
- 32  
33 540 2. Visser P-J, Scheltens P, Verhey FRJ. Do MCI criteria in drug trials accurately identify  
34  
35 542 subjects with predementia Alzheimer's disease? *J Neurol Neurosurg Psychiatry*.  
36  
37 2005;76:1348–54.
- 38  
39 544 3. Scheltens NME, Galindo-Garre F, Pijnenburg YAL, van der Vlies AE, Smits LL, Koene T,  
40  
41 et al. The identification of cognitive subtypes in Alzheimer's disease dementia using latent  
42  
43 546 class analysis. *J Neurol Neurosurg Psychiatry*. 2016;87:235–43.
- 44  
45 548 4. Murray ME, Graff-Radford NR, Ross OA, Petersen RC, Duara R, Dickson DW.  
46  
47 Neuropathologically defined subtypes of Alzheimer's disease with distinct clinical  
48  
49 550 characteristics: a retrospective study. *Lancet Neurol*. 2011;10:785–96.
- 50  
51  
52 552 5. Hwang J, Kim CM, Jeon S, Lee JM, Hong YJ, Roh JH, et al. Prediction of Alzheimer's  
53  
54 554 disease pathophysiology based on cortical thickness patterns. *Alzheimer's & dementia*  
55  
56 (Amsterdam, Netherlands). 2016;2:58–67.
- 57  
58 556 6. Dong A, Toledo JB, Honnorat N, Doshi J, Varol E, Sotiras A, et al. Heterogeneity of  
59  
60 neuroanatomical patterns in prodromal Alzheimer's disease: links to cognition, progression  
61  
62 and biomarkers. *Brain*. 2017;140:735–47.
- 63  
64 7. Korolev IO, Symonds LL, Bozoki AC, for the Alzheimer's Disease Neuroimaging  
65  
66 Initiative. Predicting Progression from Mild Cognitive Impairment to Alzheimer's Dementia  
67  
68 Using Clinical, MRI, and Plasma Biomarkers via Probabilistic Pattern Classification. *PLoS*

558 One. 2016;11:e0138866–25.

1  
2 8. Mathotaarachchi S, Pascoal TA, Shin M, Benedet AL, Kang MS, Beaudry T, et al.  
3 560 Identifying incipient dementia individuals using machine learning and amyloid imaging.  
4 Neurobiol Aging. 2017;59:80–90.  
5

6  
7 562 9. Dansereau C, Tam A, Badhwar A, Urchs S, Orban P, Rosa-Neto P, et al. A brain signature  
8 highly predictive of future progression to Alzheimer’s dementia. arXiv preprint arXiv:1712  
9 564 08058. 2017;

10  
11 10. Bellec P, Lavoie-Courchesne S, Dickinson P, Lerch JP, Zijdenbos AP, Evans A. The  
12 566 pipeline system for Octave and Matlab (PSOM): a lightweight scripting framework and  
13 execution engine for scientific workflows. Front Neuroinform. 2012;6:7.  
14  
15

16 568 11. Fonov V, Evans A, Botteron K, Almli CR, McKinstry RC, Collins DL. Unbiased average  
17 age-appropriate atlases for pediatric studies. Neuroimage. 2011;54:313–27.  
18  
19

20 570 12. Ad-Dab’bagh Y, Einarson D, Lyttelton O, Muehlboeck JS, Mok K, Ivanov O, et al. The  
21 CIVET image-processing environment: a fully automated comprehensive pipeline for  
22 572 anatomical neuroimaging research. Proceedings of the 12th annual meeting of the  
23 organization for human brain mapping. 2006;2266.  
24  
25

26 574 13. Ashburner J. A fast diffeomorphic image registration algorithm. Neuroimage.  
27 2007;38:95–113.  
28  
29

30 576 14. Orban P, Tam A, Urchs S, Savard M, Madjar C, Badhwar A, et al. Subtypes of functional  
31 brain connectivity as early markers of neurodegeneration in Alzheimer’s disease. bioRxiv.  
32 578 2017;195164.  
33

34 15. Zhang X, Mormino EC, Sun N, Sperling RA, Sabuncu MR, Yeo BTT, et al. Bayesian  
35 580 model reveals latent atrophy factors with dissociable cognitive trajectories in Alzheimer’s  
36 disease. Proc Natl Acad Sci U S A. 2016;113:E6535–44.  
37  
38

39 582 16. Crane PK, Carle A, Gibbons LE, Insel P, Mackin RS, Gross A, et al. Development and  
40 assessment of a composite score for memory in the Alzheimer’s Disease Neuroimaging  
41 Initiative (ADNI). Brain Imaging Behav. 2012;6:502–16.  
42 584  
43

44 17. Gibbons LE, Carle AC, Mackin RS, Harvey D, Mukherjee S, Insel P, et al. A composite  
45 586 score for executive functioning, validated in Alzheimer’s Disease Neuroimaging Initiative  
46 (ADNI) participants with baseline mild cognitive impairment. Brain Imaging Behav.  
47 588 2012;6:517–27.  
48  
49

50 18. Belleville S, Fouquet C, Hudon C, Zomahoun HTV, Croteau J, Consortium for the Early  
51 590 Identification of Alzheimer’s disease-Quebec. Neuropsychological Measures  
52 that Predict Progression from Mild Cognitive Impairment to Alzheimer’s type dementia in  
53 Older Adults: a Systematic Review and Meta-Analysis. Neuropsychol Rev. 2017;27:328–53.  
54 592  
55

56 19. Pedregosa F, Varoquaux G, Gramfort A, Michel V, Thirion B, Grisel O, et al. Scikit-learn:  
57 594 Machine Learning in Python. J Mach Learn Res. 2011;2825–30.  
58  
59

60 20. Fan R-E, Chang K-W, Hsieh C-J, Wang X-R, Lin C-J. LIBLINEAR: A library for large  
61  
62  
63  
64  
65

596 linear classification. *J Mach Learn Res.* 2008;9:1871–4.

1  
2  
3 598 21. Phipson B, Smyth GK. Permutation P-values should never be zero: calculating exact  
4 P-values when permutations are randomly drawn. *Stat Appl Genet Mol Biol.* 2010;9.

5  
6 22. Shaw LM, Vanderstichele H, Knapik-Czajka M, Clark CM, Aisen PS, Petersen RC, et al.  
7 600 Cerebrospinal fluid biomarker signature in Alzheimer’s disease neuroimaging initiative  
8 subjects. *Ann Neurol.* 2009;65:403–13.

9  
10 602 23. Jones E, Oliphant T, Peterson P. SciPy: open source scientific tools for Python,  
11 <http://www.scipy.org/>. 2001;

12  
13  
14 604 24. Seabold S, Perktold J. Statsmodels: Econometric and statistical modeling with python.  
15 *Proceedings of the 9th Python in Science Conference.* SciPy society Austin; 2010.

16  
17 606 25. Pinheiro J, Bates D, DebRoy S, Sarkar D, R Core Team. nlme: linear and nonlinear mixed  
18 effects models. R package version 3.1-117, <https://CRAN.R-project.org/package=nlme>. 2018;

19  
20  
21 608 26. Mitchell AJ, Shiri-Feshki M. Rate of progression of mild cognitive impairment to  
22 dementia - meta-analysis of 41 robust inception cohort studies. *Acta Psychiatr Scand.*  
23  
24 610 2009;119:252–65.

25  
26 27. Gibbons LE, Carle AC, Mackin RS, Harvey D, Mukherjee S, Insel P, et al. A composite  
27 612 score for executive functioning, validated in Alzheimer’s Disease Neuroimaging Initiative  
28 (ADNI) participants with baseline mild cognitive impairment. *Brain Imaging Behav.*  
29  
30 614 2012;6:517–27.

31  
32 28. Noh Y, Jeon S, Lee JM, Seo SW, Kim GH, Cho H, et al. Anatomical heterogeneity of  
33 616 Alzheimer disease Based on cortical thickness on MRIs. *Neurology.* 2014;83:1936–44.

34  
35  
36 29. Park J-Y, Na HK, Kim S, Kim H, Kim HJ, Seo SW, et al. Robust Identification of  
37 618 Alzheimer’s Disease subtypes based on cortical atrophy patterns. *Sci Rep.* 2017;7:43270.

38  
39  
40 620 30. Varol E, Sotiras A, Davatzikos C, Alzheimer’s Disease Neuroimaging Initiative.  
41 HYDRA: Revealing heterogeneity of imaging and genetic patterns through a multiple  
42 max-margin discriminative analysis framework. *Neuroimage.* 2017;145:346–64.

43  
44 622 31. Dickerson BC, Sperling RA, Hyman BT, Albert MS, Blacker D. Clinical prediction of  
45 Alzheimer disease dementia across the spectrum of mild cognitive impairment. *Arch Gen  
46 624 Psychiatry.* 2007;64:1443–50.

47  
48  
49 32. Tabert MH, Manly JJ, Liu X, Pelton GH, Rosenblum S, Jacobs M, et al.  
50 626 Neuropsychological prediction of conversion to Alzheimer disease in patients with mild  
51 cognitive impairment. *Arch Gen Psychiatry.* 2006;63:916–24.

52  
53  
54 628 33. Belleville S, Gauthier S, Lepage É, Kergoat M-J, Gilbert B. Predicting decline in mild  
55 cognitive impairment: A prospective cognitive study. *Neuropsychology.* 2014;28:643–52.

56  
57 630 34. Mitchell J, Arnold R, Dawson K, Nestor PJ, Hodges JR. Outcome in subgroups of mild  
58 cognitive impairment (MCI) is highly predictable using a simple algorithm. *J Neurol.*

59  
60  
61  
62  
63  
64  
65



2009;256:1500–9.

35. Braak H, Braak E. Neuropathological staging of Alzheimer-related changes. *Acta Neuropathol.* 1991;82:239–59.

36. Spillantini MG, Goedert M. Tau pathology and neurodegeneration. *Lancet Neurol.* 2013;12:609–22.

37. Eskildsen SF, Coupé P, García-Lorenzo D, Fonov V, Pruessner JC, Collins DL, et al. Prediction of Alzheimer’s disease in subjects with mild cognitive impairment from the ADNI cohort using patterns of cortical thinning. *Neuroimage.* 2013;65:511–21.

38. Moradi E, Pepe A, Gaser C, Huttunen H, Tohka J, Alzheimer’s Disease Neuroimaging Initiative. Machine learning framework for early MRI-based Alzheimer’s conversion prediction in MCI subjects. *Neuroimage.* 2015;104:398–412.

## Figure Captions

Figure 1. Subtyping procedure and resulting subtypes. a) A hierarchical clustering procedure identified 7 subtypes, or subgroups, of individuals with similar patterns of grey matter topography within the ADNI1 cohort of CN and AD subjects (top). A measure of spatial similarity, called subtype weight, between a single individual's grey matter volume map and the average of a given subtype was calculated for all individuals and all subtypes (bottom). b) Maps of the 7 subtypes showing the distribution of grey matter across all voxels relative to the average. CN\* and AD\* denote significant associations between the subtype weights and diagnoses of cognitively normal (CN) or Alzheimer's dementia (AD) respectively.

Figure 2. Specificity, sensitivity, and positive predictive value (PPV) for the base SVM and highly predictive signature (HPS) classifiers in the classifications of a) patients with AD dementia (AD) and cognitively normal individuals (CN) and b) patients with mild cognitive impairment who progress to AD (pMCI) and stable MCI (sMCI) in ADNI1 and ADNI2. VBM represents the model trained with VBM subtypes, COG represents the model trained with baseline cognitive scores, and VCOG represents the model trained with both VBM subtypes and cognition. Significant differences are denoted by \* for  $p < 0.05$  and \*\* for  $p < 0.001$ . Positive predictive value was adjusted (PPV (adj)) for a prevalence of 33.6% pMCI in a sample of MCI subjects for both ADNI1 and ADNI2 MCI cohorts.

Figure 3. Characteristics of MCI subjects with the VCOG signature in ADNI1 and ADNI2. We show the percentage of MCI subjects who a) progressed to dementia, were b) APOE4 carriers, c) female, d) positive for  $A\beta$  measured by a cut-off of 192 pg/mL in the CSF [22], and e) positive for tau measured by a cut-off of 93 pg/mL in the CSF [22] in each classification (HPS+, Non-HPS+, and Negative). f) Age and g) cognitive trajectories, measured by the Alzheimer's Disease Assessment Scale - Cognitive subscale with 13 items (ADAS13), across the three classes. Significant differences are denoted by \* for family-wise error rate-corrected  $p < 0.05$ .

Figure 4. Coefficients of the high confidence prediction a) VCOG model, b) COG model, and c) VBM model. ADAS13=Alzheimer's Disease Assessment Scale - Cognitive, MEM=ADNI-MEM score; EXEC=ADNI-EF score, BNT=Boston Naming Test, CLOCK=clock drawing test, VBM 1-7=VBM subtype weights, GMV=mean grey matter volume, TIV=total intracranial volume.

1  
2  
3  
4  
5  
6  
7  
8  
9  
10  
11  
12  
13  
14  
15  
16  
17  
18  
19  
20  
21  
22  
23  
24  
25  
26  
27  
28  
29  
30  
31  
32  
33  
34  
35  
36  
37  
38  
39  
40  
41  
42  
43  
44  
45  
46  
47  
48  
49  
50  
51  
52  
53  
54  
55  
56  
57  
58  
59  
60  
61  
62  
63  
64  
65

## Tables

Table 1. Demographic information for post-QC subjects in ADNI1 and ADNI2.

| <b>ADNI1</b>       | <b>CN</b>  | <b>sMCI</b> | <b>pMCI</b> | <b>AD</b>  |
|--------------------|------------|-------------|-------------|------------|
| <b>N</b>           | 205        | 88          | 147         | 165        |
| <b>Age ± SD</b>    | 76.1 ± 5.0 | 74.0 ± 7.6  | 74.3 ± 7.1  | 75.4 ± 7.5 |
| <b>Female %</b>    | 51.7       | 40.9        | 40.8        | 51.5       |
| <b>APOE4+ %</b>    | 27.8       | 37.5        | 68.7        | 65.4       |
| <b>ADAS13 ± SD</b> | 9.5 ± 4.3  | 14.3 ± 5.5  | 21.3 ± 5.3  | 28.6 ± 7.1 |
| <b>MMSE ± SD</b>   | 29.1 ± 1.0 | 27.7 ± 1.7  | 26.7 ± 1.7  | 23.4 ± 2.0 |
| <b>ADNI2</b>       | <b>CN</b>  | <b>sMCI</b> | <b>pMCI</b> | <b>AD</b>  |
| <b>N</b>           | 188        | 180         | 55          | 89         |
| <b>Age ± SD</b>    | 72.8 ± 6.1 | 70.8 ± 7.3  | 72.1 ± 7.1  | 74.4 ± 7.8 |
| <b>Female %</b>    | 54.0       | 47.8        | 49.1        | 46.1       |
| <b>APOE4+ %</b>    | 29.4       | 35.6        | 65.4        | 71.3       |
| <b>ADAS13 ± SD</b> | 9.1 ± 4.2  | 11.8 ± 5.3  | 21.4 ± 6.5  | 31.6 ± 8.7 |
| <b>MMSE ± SD</b>   | 29.1 ± 1.1 | 28.4 ± 1.6  | 27.3 ± 1.9  | 23.1 ± 2.3 |

ADAS13=Alzheimer's Disease Assessment Scale - Cognitive subscale (13 items);

MMSE=Mini Mental State Examination

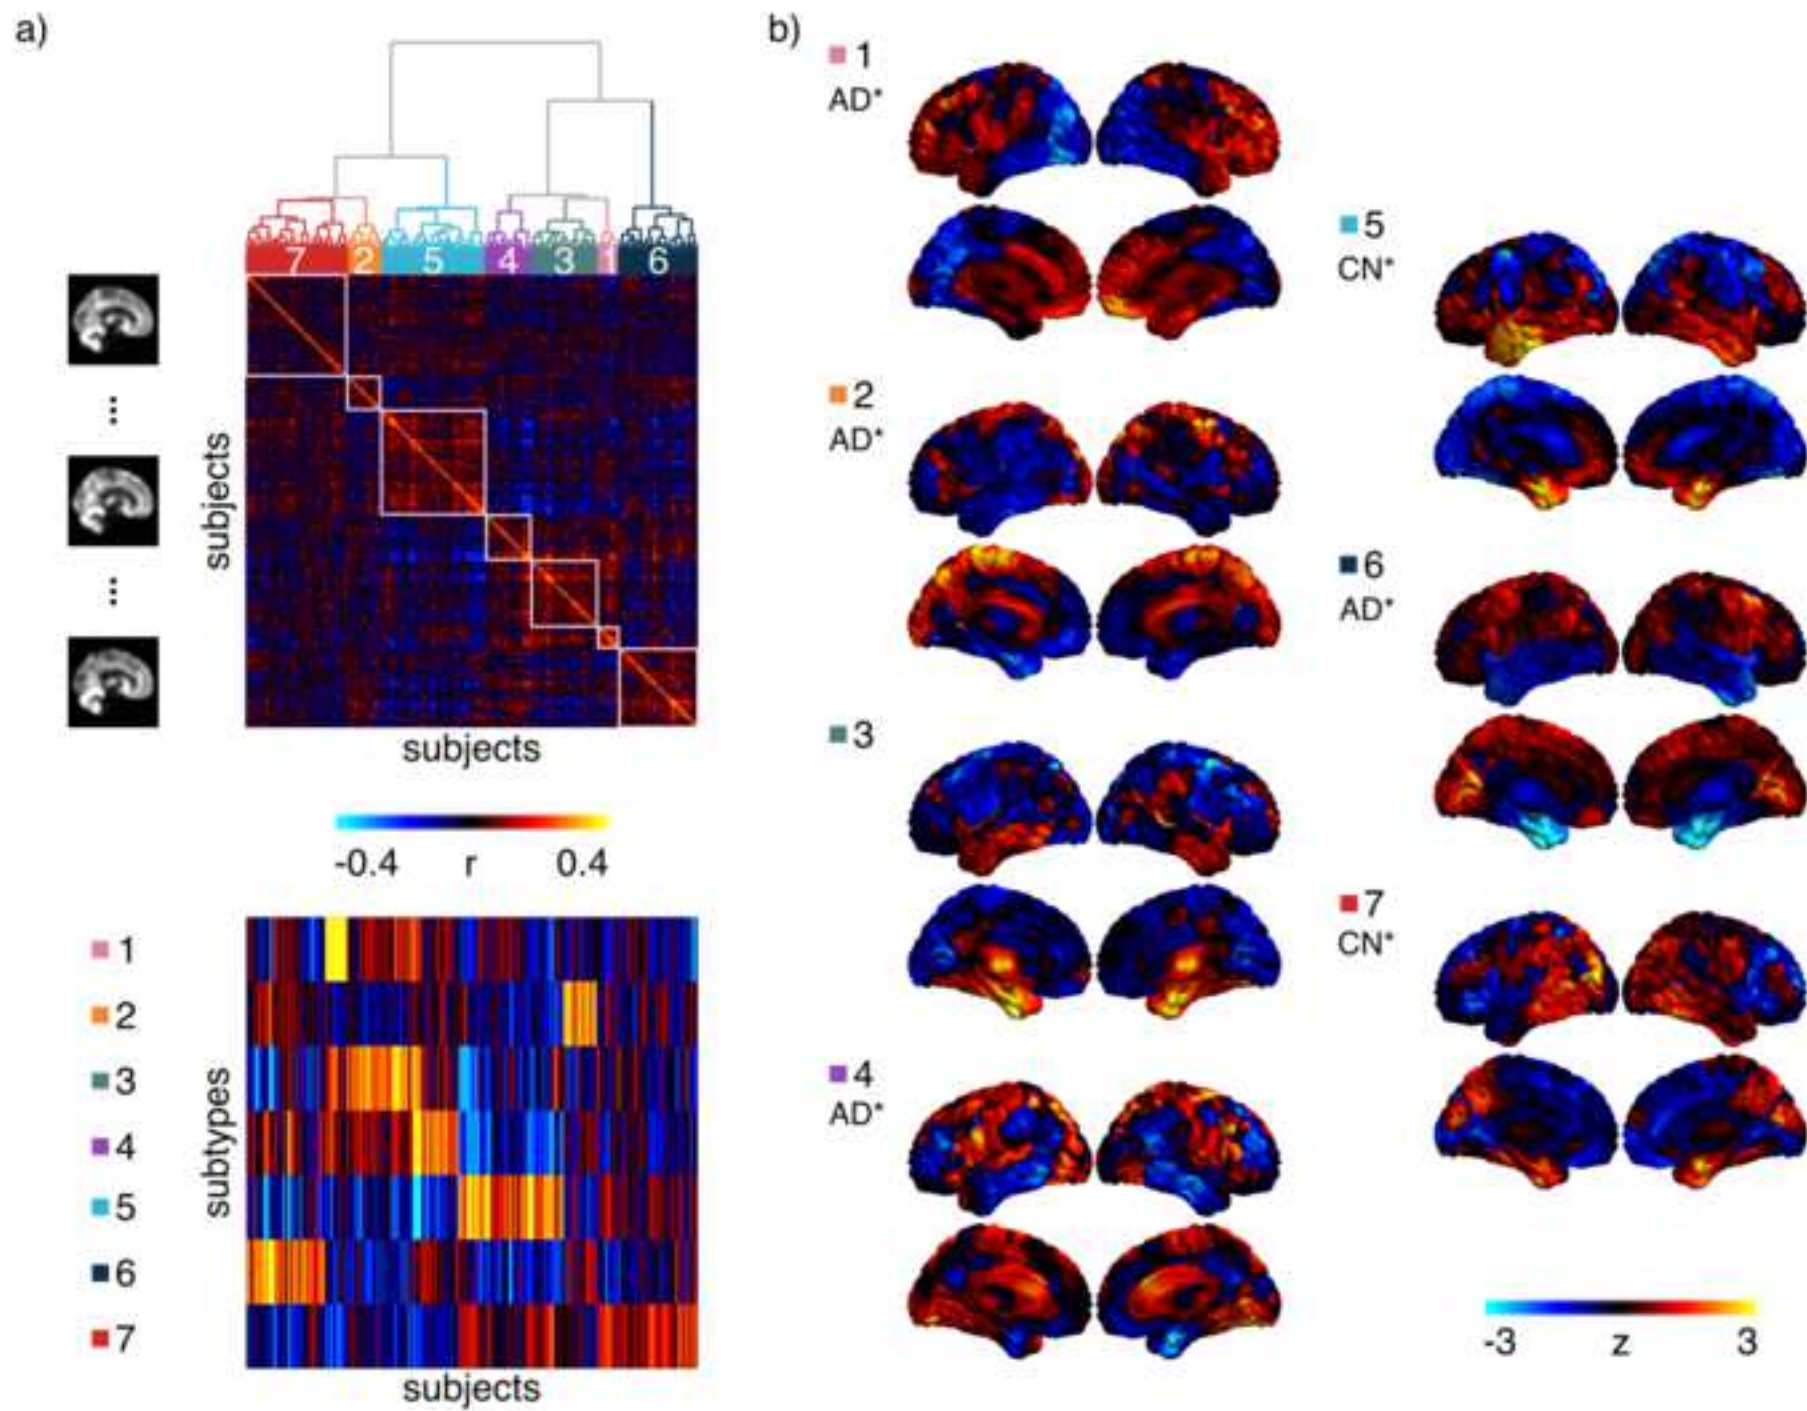

## a) AD vs CN

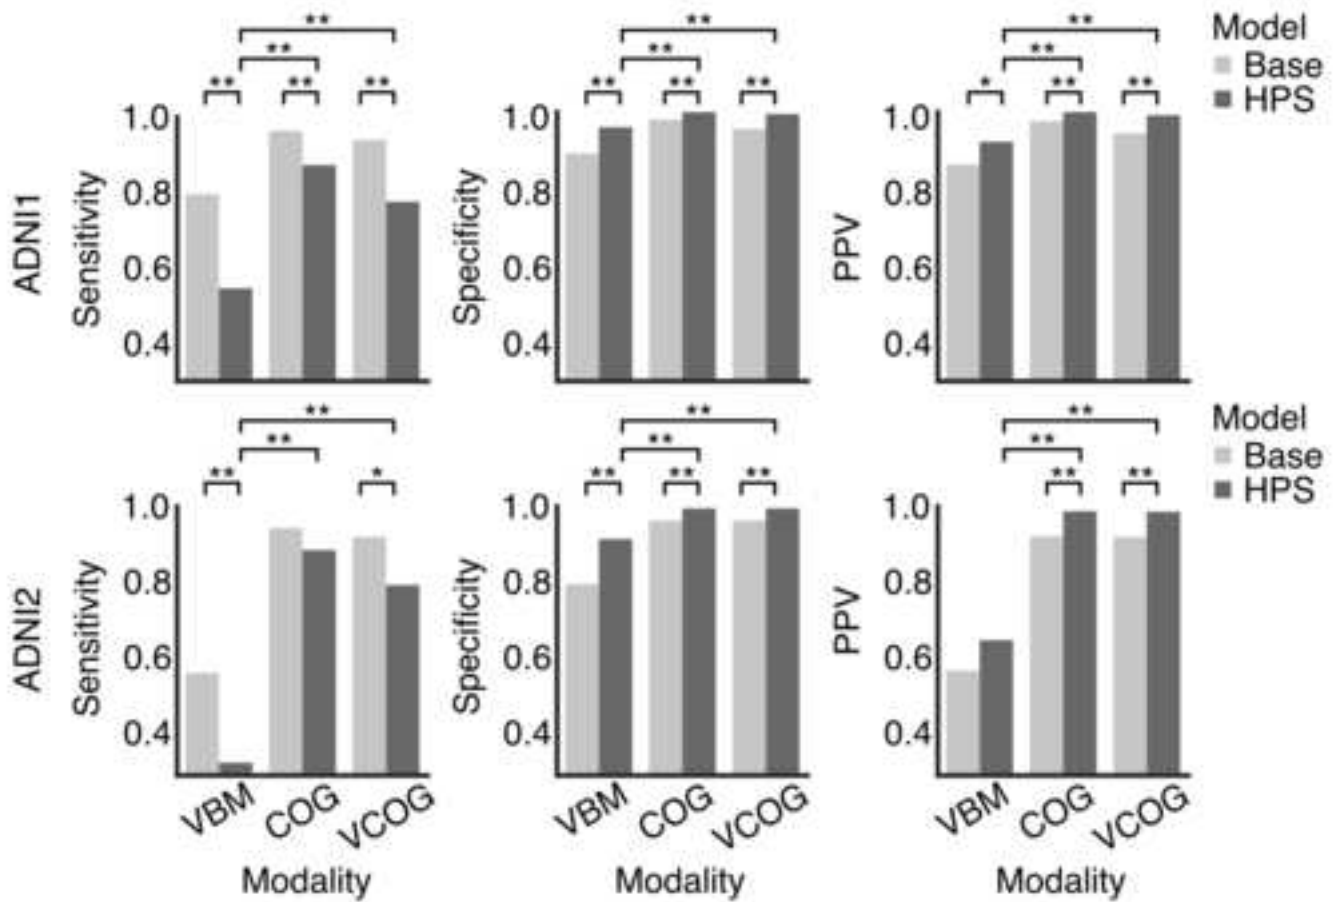

## b) pMCI vs sMCI

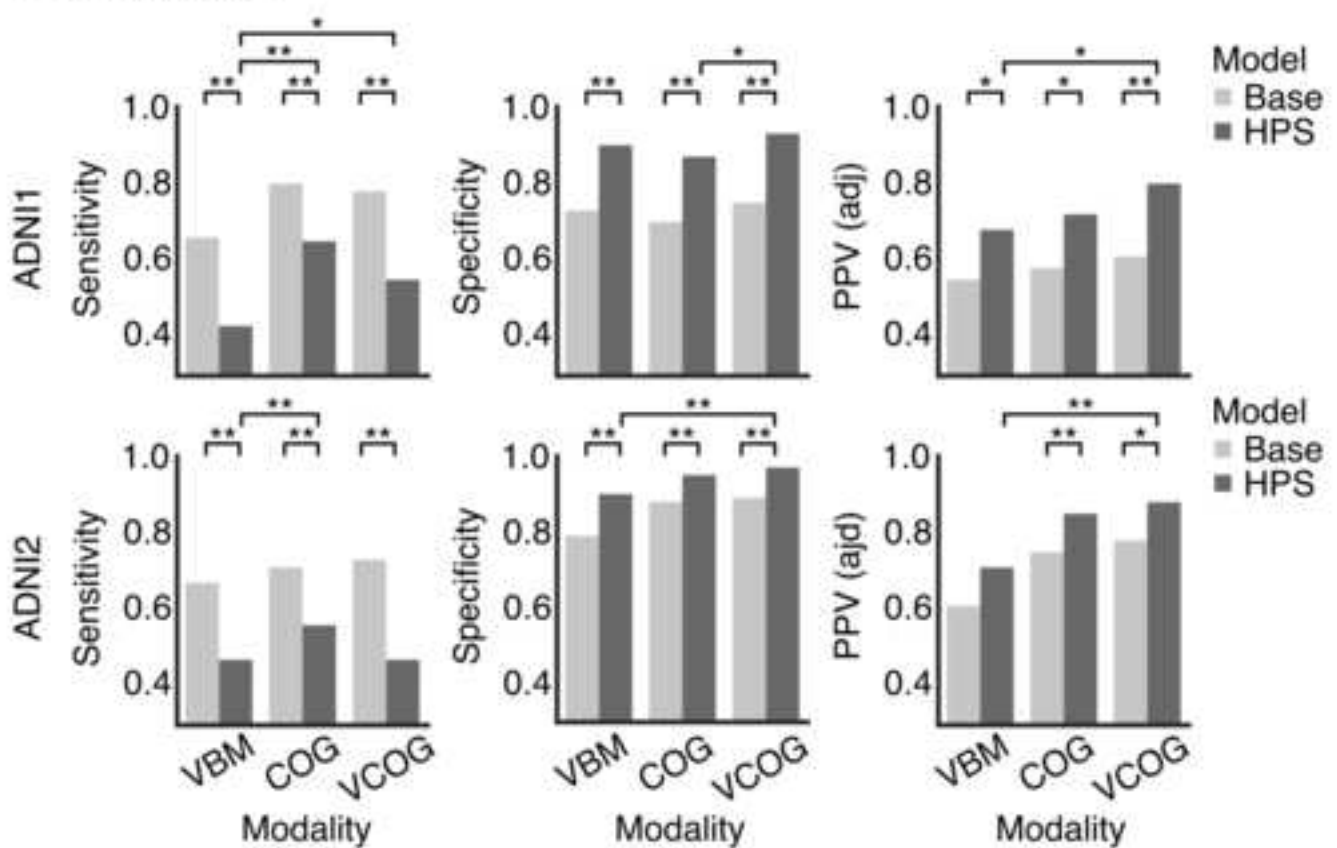

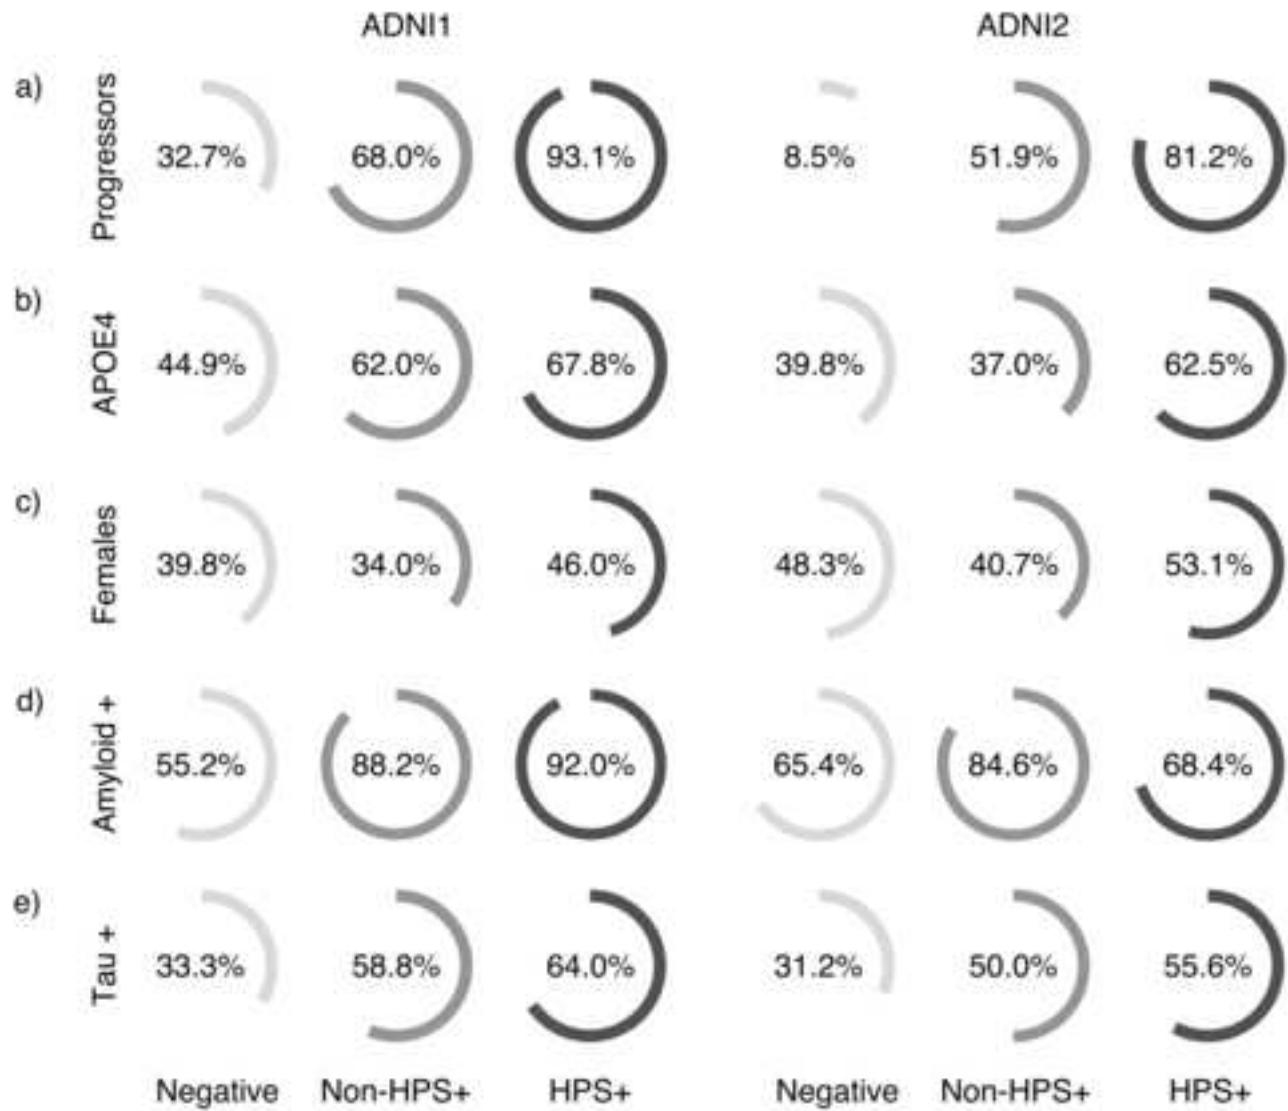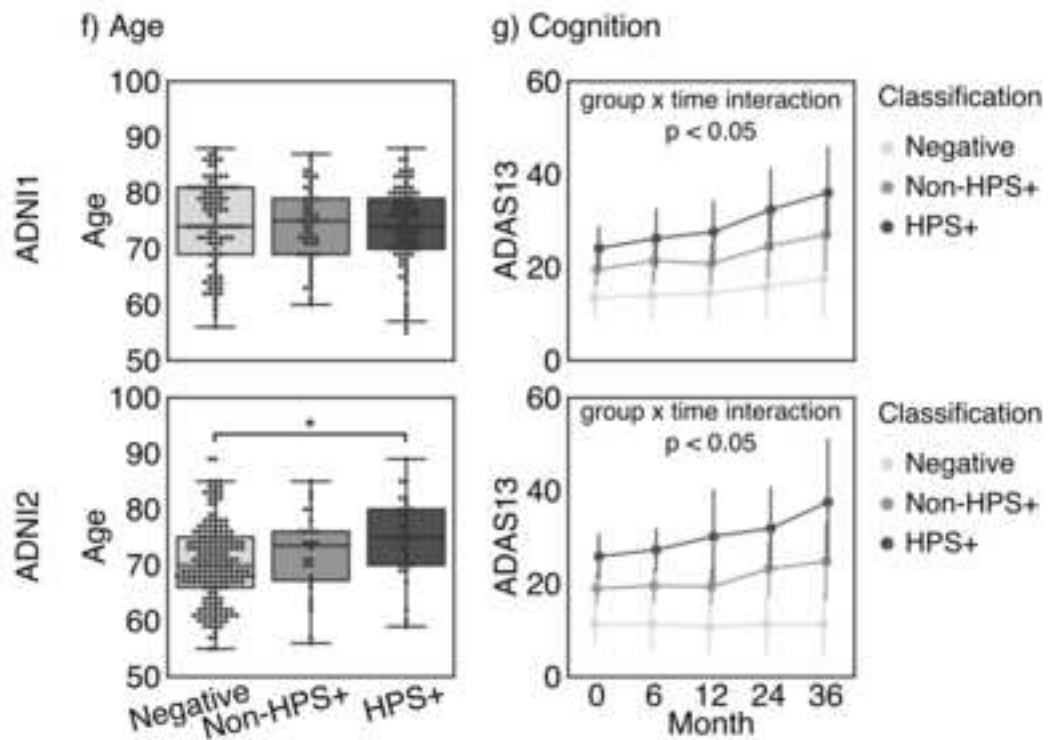

a) VCOG HPS model

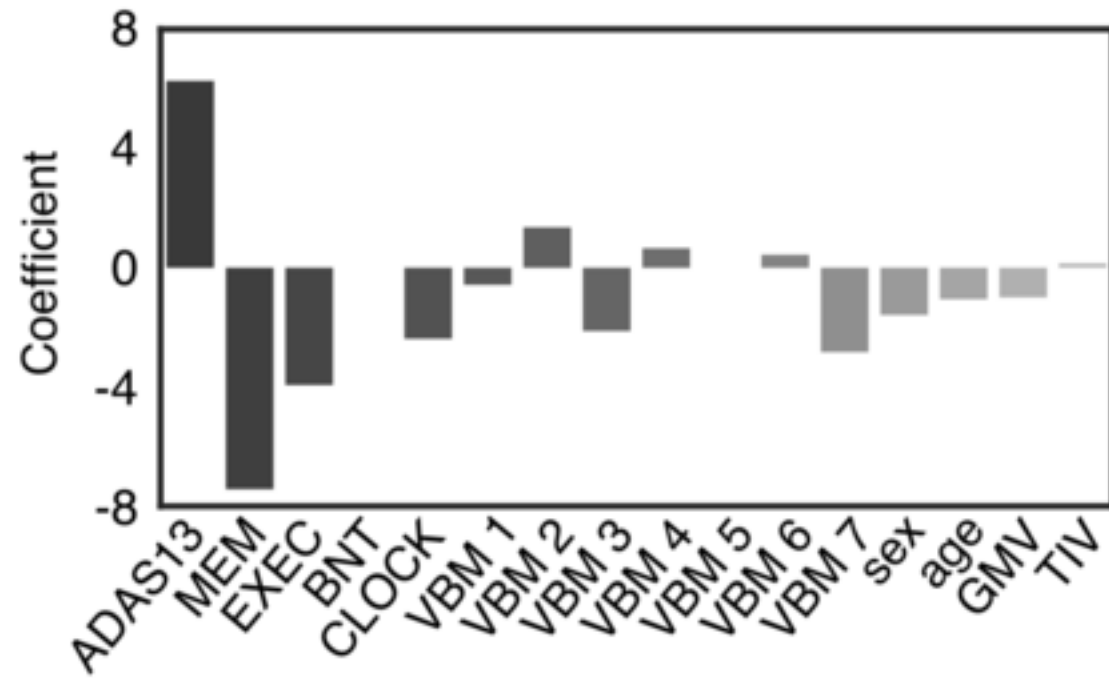

b) COG HPS model

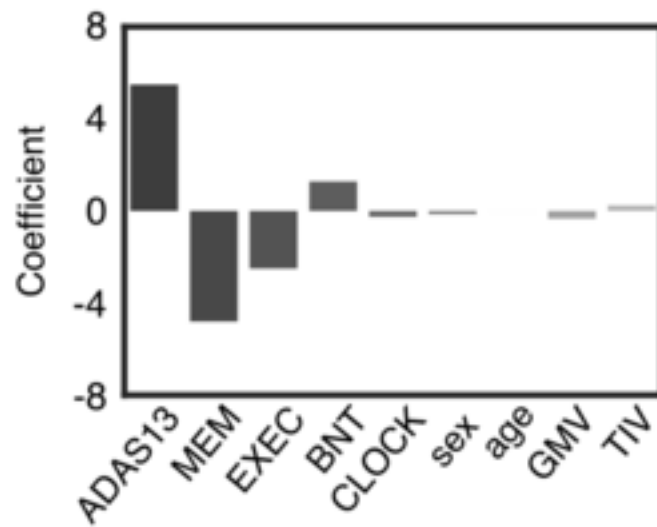

c) VBM HPS model

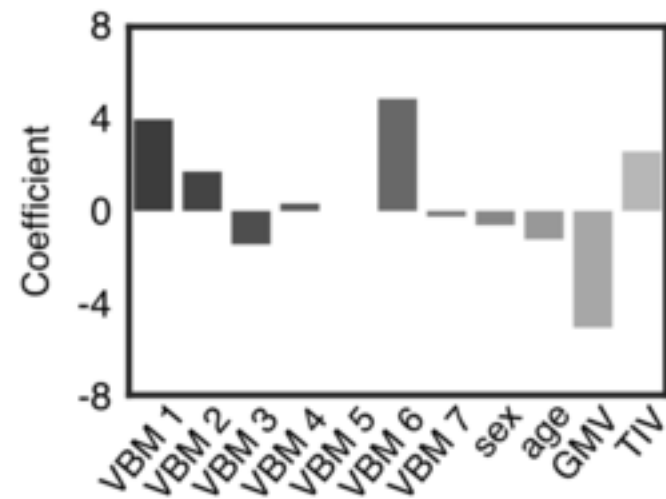



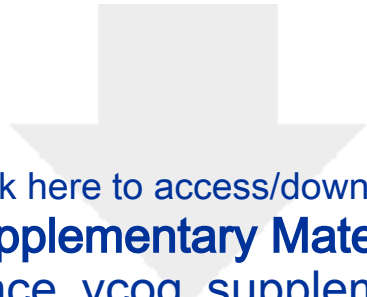

Click here to access/download  
**Supplementary Material**  
gigascience\_vcog\_supplemental.pdf

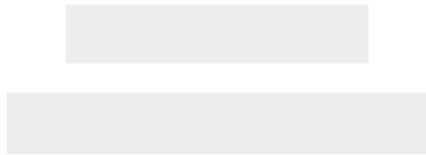

October 9, 2018

Re: Submission to GigaScience

Dear Editors,

Please find enclosed our revised manuscript titled “A highly predictive signature of cognition and brain atrophy for progression to Alzheimer's dementia” for your consideration.

We have updated our manuscript with the requested information regarding containerization and a simulated dataset.

The simulated dataset is using group-level statistics derived from the ADNI sample, but does not include any participant-level information. As such, it can be freely shared and reused. Importantly, these simulations were designed to replicate the group differences that were identified in the paper using machine learning tools. We have shared a container including all the code and dependencies used in our manuscript, and the reviewers as well as interested readers will be able to reproduce the training and testing of machine learning models from the simulated data. All the code can be executed online via the binder platform, without requiring any local installation or download.

Thank you again for your time and effort in considering our manuscript.

Best regards,

Angela Tam, PhD  
On behalf of the co-authors
