# Supplementary material for: A highly predictive signature of cognition and brain atrophy for progression to Alzheimer's dementia
Source: PubMed Central journal article supplement (PMC6511068; doi:10.1093/gigascience/giz055), 2019-05-11
Supplement: giz055_giga-d-18-00349_revision_1.pdf [file giz055_giga-d-18-00349_revision_1.pdf]

# GigaScience

## A highly predictive signature of cognition and brain atrophy for progression to Alzheimer's dementia --Manuscript Draft--

|                                                      |                                                                                                                                                                                                                                                                                                                                                                                                                                                                                                                                                                                                                                                                                                                                                                                                                                                                                                                                                                                                                                                                                                                                                                                                                                                                                                                                                                                                                                                                                                                                                                                                                                                                                                                                                                                             |                  |
|------------------------------------------------------|---------------------------------------------------------------------------------------------------------------------------------------------------------------------------------------------------------------------------------------------------------------------------------------------------------------------------------------------------------------------------------------------------------------------------------------------------------------------------------------------------------------------------------------------------------------------------------------------------------------------------------------------------------------------------------------------------------------------------------------------------------------------------------------------------------------------------------------------------------------------------------------------------------------------------------------------------------------------------------------------------------------------------------------------------------------------------------------------------------------------------------------------------------------------------------------------------------------------------------------------------------------------------------------------------------------------------------------------------------------------------------------------------------------------------------------------------------------------------------------------------------------------------------------------------------------------------------------------------------------------------------------------------------------------------------------------------------------------------------------------------------------------------------------------|------------------|
| <b>Manuscript Number:</b>                            | GIGA-D-18-00349R1                                                                                                                                                                                                                                                                                                                                                                                                                                                                                                                                                                                                                                                                                                                                                                                                                                                                                                                                                                                                                                                                                                                                                                                                                                                                                                                                                                                                                                                                                                                                                                                                                                                                                                                                                                           |                  |
| <b>Full Title:</b>                                   | A highly predictive signature of cognition and brain atrophy for progression to Alzheimer's dementia                                                                                                                                                                                                                                                                                                                                                                                                                                                                                                                                                                                                                                                                                                                                                                                                                                                                                                                                                                                                                                                                                                                                                                                                                                                                                                                                                                                                                                                                                                                                                                                                                                                                                        |                  |
| <b>Article Type:</b>                                 | Research                                                                                                                                                                                                                                                                                                                                                                                                                                                                                                                                                                                                                                                                                                                                                                                                                                                                                                                                                                                                                                                                                                                                                                                                                                                                                                                                                                                                                                                                                                                                                                                                                                                                                                                                                                                    |                  |
| <b>Funding Information:</b>                          | Canadian Network for Research and Innovation in Machining Technology, Natural Sciences and Engineering Research Council of Canada (CA) (RN000028)                                                                                                                                                                                                                                                                                                                                                                                                                                                                                                                                                                                                                                                                                                                                                                                                                                                                                                                                                                                                                                                                                                                                                                                                                                                                                                                                                                                                                                                                                                                                                                                                                                           | Dr Pierre Bellec |
|                                                      | Courtois Foundation (n/a)                                                                                                                                                                                                                                                                                                                                                                                                                                                                                                                                                                                                                                                                                                                                                                                                                                                                                                                                                                                                                                                                                                                                                                                                                                                                                                                                                                                                                                                                                                                                                                                                                                                                                                                                                                   | Dr Pierre Bellec |
|                                                      | Lemaire Foundation (n/a)                                                                                                                                                                                                                                                                                                                                                                                                                                                                                                                                                                                                                                                                                                                                                                                                                                                                                                                                                                                                                                                                                                                                                                                                                                                                                                                                                                                                                                                                                                                                                                                                                                                                                                                                                                    | Dr Pierre Bellec |
| <b>Abstract:</b>                                     | <p>Clinical trials in Alzheimer's disease need to enroll patients whose cognition will decline over time, if left untreated, in order to demonstrate the efficacy of an intervention. Machine learning models used to screen for patients at risk of progression to dementia should therefore favor specificity (detecting only progressors) over sensitivity (detecting all progressors), especially when the prevalence of progressors is low. Here, we explore whether such high-risk patients can be identified using cognitive assessments and structural neuroimaging, by training machine learning tools in a high specificity regime. A multimodal signature of Alzheimer's dementia was first extracted from ADNI1. We then validated the predictive value of this signature on ADNI1 patients with mild cognitive impairment (N=235). The signature was optimized to predict progression to dementia over three years with low sensitivity (55.1%) but high specificity (95.6%), resulting in only moderate accuracy (69.3%) but high positive predictive value (80.4%, adjusted for a "typical" 33% prevalence rate of true progressors). These results were replicated in ADNI2 (N=235), with 87.8% adjusted positive predictive value (96.7% specificity, 47.3% sensitivity, 85.1% accuracy). We found that cognitive measures alone could identify high-risk individuals, with structural measurements providing a slight improvement. The signature had comparable receiver operating characteristics to standard machine learning tools, yet a marked improvement in positive predictive value was achieved over the literature by selecting a high specificity operating point. The multimodal signature can be readily applied for the enrichment of clinical trials.</p> |                  |
| <b>Corresponding Author:</b>                         | Angela Tam, PhD<br>Centre de recherche de l'institut universitaire de gériatrie de Montréal<br>Montreal, Quebec CANADA                                                                                                                                                                                                                                                                                                                                                                                                                                                                                                                                                                                                                                                                                                                                                                                                                                                                                                                                                                                                                                                                                                                                                                                                                                                                                                                                                                                                                                                                                                                                                                                                                                                                      |                  |
| <b>Corresponding Author Secondary Information:</b>   |                                                                                                                                                                                                                                                                                                                                                                                                                                                                                                                                                                                                                                                                                                                                                                                                                                                                                                                                                                                                                                                                                                                                                                                                                                                                                                                                                                                                                                                                                                                                                                                                                                                                                                                                                                                             |                  |
| <b>Corresponding Author's Institution:</b>           | Centre de recherche de l'institut universitaire de gériatrie de Montréal                                                                                                                                                                                                                                                                                                                                                                                                                                                                                                                                                                                                                                                                                                                                                                                                                                                                                                                                                                                                                                                                                                                                                                                                                                                                                                                                                                                                                                                                                                                                                                                                                                                                                                                    |                  |
| <b>Corresponding Author's Secondary Institution:</b> |                                                                                                                                                                                                                                                                                                                                                                                                                                                                                                                                                                                                                                                                                                                                                                                                                                                                                                                                                                                                                                                                                                                                                                                                                                                                                                                                                                                                                                                                                                                                                                                                                                                                                                                                                                                             |                  |
| <b>First Author:</b>                                 | Angela Tam, PhD                                                                                                                                                                                                                                                                                                                                                                                                                                                                                                                                                                                                                                                                                                                                                                                                                                                                                                                                                                                                                                                                                                                                                                                                                                                                                                                                                                                                                                                                                                                                                                                                                                                                                                                                                                             |                  |
| <b>First Author Secondary Information:</b>           |                                                                                                                                                                                                                                                                                                                                                                                                                                                                                                                                                                                                                                                                                                                                                                                                                                                                                                                                                                                                                                                                                                                                                                                                                                                                                                                                                                                                                                                                                                                                                                                                                                                                                                                                                                                             |                  |
| <b>Order of Authors:</b>                             | Angela Tam, PhD                                                                                                                                                                                                                                                                                                                                                                                                                                                                                                                                                                                                                                                                                                                                                                                                                                                                                                                                                                                                                                                                                                                                                                                                                                                                                                                                                                                                                                                                                                                                                                                                                                                                                                                                                                             |                  |
|                                                      | Christian Dansereau, PhD                                                                                                                                                                                                                                                                                                                                                                                                                                                                                                                                                                                                                                                                                                                                                                                                                                                                                                                                                                                                                                                                                                                                                                                                                                                                                                                                                                                                                                                                                                                                                                                                                                                                                                                                                                    |                  |
|                                                      | Yasser Iturria-Medina, PhD                                                                                                                                                                                                                                                                                                                                                                                                                                                                                                                                                                                                                                                                                                                                                                                                                                                                                                                                                                                                                                                                                                                                                                                                                                                                                                                                                                                                                                                                                                                                                                                                                                                                                                                                                                  |                  |
|                                                      | Sebastian Urchs, MSc                                                                                                                                                                                                                                                                                                                                                                                                                                                                                                                                                                                                                                                                                                                                                                                                                                                                                                                                                                                                                                                                                                                                                                                                                                                                                                                                                                                                                                                                                                                                                                                                                                                                                                                                                                        |                  |
|                                                      | Pierre Orban, PhD                                                                                                                                                                                                                                                                                                                                                                                                                                                                                                                                                                                                                                                                                                                                                                                                                                                                                                                                                                                                                                                                                                                                                                                                                                                                                                                                                                                                                                                                                                                                                                                                                                                                                                                                                                           |                  |
|                                                      |                                                                                                                                                                                                                                                                                                                                                                                                                                                                                                                                                                                                                                                                                                                                                                                                                                                                                                                                                                                                                                                                                                                                                                                                                                                                                                                                                                                                                                                                                                                                                                                                                                                                                                                                                                                             |                  |

|                                                |                                                                                                                                                                                                                                                                                                                                                                                                                                                                                                                                                                                                                                                                                                                                                                                                                                                                                                                                                                                                                                                                                                                                                                                                                                                                                                                                                                                                                                                                                                                                                                                                                                                                                                                                                                                                                                                                                                                                                                                                                                                                                                                                                                                                                                                                                                                                                                                                                                                                                                                                                                                                                                                                                                                                                                                                                                                                                                                                                                                                                                                                                                                                                                                                                                                                                                                                                                                                                                        |
|------------------------------------------------|----------------------------------------------------------------------------------------------------------------------------------------------------------------------------------------------------------------------------------------------------------------------------------------------------------------------------------------------------------------------------------------------------------------------------------------------------------------------------------------------------------------------------------------------------------------------------------------------------------------------------------------------------------------------------------------------------------------------------------------------------------------------------------------------------------------------------------------------------------------------------------------------------------------------------------------------------------------------------------------------------------------------------------------------------------------------------------------------------------------------------------------------------------------------------------------------------------------------------------------------------------------------------------------------------------------------------------------------------------------------------------------------------------------------------------------------------------------------------------------------------------------------------------------------------------------------------------------------------------------------------------------------------------------------------------------------------------------------------------------------------------------------------------------------------------------------------------------------------------------------------------------------------------------------------------------------------------------------------------------------------------------------------------------------------------------------------------------------------------------------------------------------------------------------------------------------------------------------------------------------------------------------------------------------------------------------------------------------------------------------------------------------------------------------------------------------------------------------------------------------------------------------------------------------------------------------------------------------------------------------------------------------------------------------------------------------------------------------------------------------------------------------------------------------------------------------------------------------------------------------------------------------------------------------------------------------------------------------------------------------------------------------------------------------------------------------------------------------------------------------------------------------------------------------------------------------------------------------------------------------------------------------------------------------------------------------------------------------------------------------------------------------------------------------------------------|
|                                                | Hanad Sharmarke, BSc                                                                                                                                                                                                                                                                                                                                                                                                                                                                                                                                                                                                                                                                                                                                                                                                                                                                                                                                                                                                                                                                                                                                                                                                                                                                                                                                                                                                                                                                                                                                                                                                                                                                                                                                                                                                                                                                                                                                                                                                                                                                                                                                                                                                                                                                                                                                                                                                                                                                                                                                                                                                                                                                                                                                                                                                                                                                                                                                                                                                                                                                                                                                                                                                                                                                                                                                                                                                                   |
|                                                | John Breitner, MD                                                                                                                                                                                                                                                                                                                                                                                                                                                                                                                                                                                                                                                                                                                                                                                                                                                                                                                                                                                                                                                                                                                                                                                                                                                                                                                                                                                                                                                                                                                                                                                                                                                                                                                                                                                                                                                                                                                                                                                                                                                                                                                                                                                                                                                                                                                                                                                                                                                                                                                                                                                                                                                                                                                                                                                                                                                                                                                                                                                                                                                                                                                                                                                                                                                                                                                                                                                                                      |
|                                                | Pierre Bellec, PhD                                                                                                                                                                                                                                                                                                                                                                                                                                                                                                                                                                                                                                                                                                                                                                                                                                                                                                                                                                                                                                                                                                                                                                                                                                                                                                                                                                                                                                                                                                                                                                                                                                                                                                                                                                                                                                                                                                                                                                                                                                                                                                                                                                                                                                                                                                                                                                                                                                                                                                                                                                                                                                                                                                                                                                                                                                                                                                                                                                                                                                                                                                                                                                                                                                                                                                                                                                                                                     |
| <b>Order of Authors Secondary Information:</b> |                                                                                                                                                                                                                                                                                                                                                                                                                                                                                                                                                                                                                                                                                                                                                                                                                                                                                                                                                                                                                                                                                                                                                                                                                                                                                                                                                                                                                                                                                                                                                                                                                                                                                                                                                                                                                                                                                                                                                                                                                                                                                                                                                                                                                                                                                                                                                                                                                                                                                                                                                                                                                                                                                                                                                                                                                                                                                                                                                                                                                                                                                                                                                                                                                                                                                                                                                                                                                                        |
| <b>Response to Reviewers:</b>                  | <p>Dear Editors,<br/> Please find enclosed our revised manuscript titled “A highly predictive signature of cognition and brain atrophy for progression to Alzheimer’s dementia” for your consideration.<br/> We would like to thank the editor and the three reviewers for the constructive and insightful feedback. We believe that this round of revision has substantially improved the paper.<br/> Please find our responses to the reviewers’ comments on the following pages.<br/> Best regards,<br/> Angela Tam, on behalf of the co-authors</p> <p>Editor’s comments:<br/> -Overall the reviewers request more clarification in the methods/ techniques used, and also justification of the two-stage linear model chosen, over a single stage logistic regression model. They also suggest that you expand the discussion section to include more comparison of the results with other results of the proposed algorithm (i.e. PPV, sensitivity, and specificity) with that of other machine learning studies that used sMRI (or resting-state fMRI) and/or neuropsychological measures as input features.</p> <p>We have followed the recommendations of the reviewers by clarifying the methods section and explaining the rationale behind the two-stage linear model. We added a collection of popular machine learning techniques as benchmark, and revised the positioning of the paper to emphasize that our contribution is to train a machine learning model in a regime of high specificity and positive positive value, rather than proposing a novel algorithm with improved overall accuracy. A more extensive survey of previously published machine learning studies that use MRI and neuropsychological measures have also been included in the discussion.</p> <p>Reviewer #1 comments:<br/> A multimodal signature of Alzheimer’s dementia was first extracted using machine learning tools in the ADNI1 sample, and was comprised of cognitive deficits across multiple domains as well as atrophy in temporal, parietal and occipital regions. The authors then validated the predictive value of this signature on two MCI cohorts.</p> <p>(1) How do you select the baseline of T1 scans of ADNI?<br/> All T1-weighted MRI scans for the healthy control (CN) and Alzheimer’s dementia (AD) patients that were acquired at baseline from ADNI1 and ADNI2 were included in the study. This was also the case for the patients with mild cognitive impairment (MCI), but with additional inclusion criteria. For the MCI group, each subject must have had at least 36 months of follow-up for inclusion in our study.<br/> Please see the “Data” section under “Materials and methods” on page 5.</p> <p>(2) What preprocessing techniques did you use? Did you perform any normalization technique?<br/> Each image was linearly co-registered to MNI space using the CIVET pipeline and then segmented into grey matter, white matter, and CSF probabilistic maps with SPM12. The DARTEL toolbox was used to normalize the grey matter segmentations to a predefined grey matter template in MNI152 space. Each map was modulated to preserve the total amount of signal and then smoothed with a 8 mm isotropic Gaussian blurring kernel.<br/> Please see the section “Structural features from voxel-based morphometry” under “Materials and methods” on page 6.</p> <p>(3) Why use GMV and TIV?</p> |

TIV has been shown to have significant effects on regional grey matter volumes and has been recommended as a variable to take into consideration for VBM analyses (Barnes, Josephine, Gerard R. Ridgway, Jonathan Bartlett, Susie M. D. Henley, Manja Lehmann, Nicola Hobbs, Matthew J. Clarkson, David G. MacManus, Sebastien Ourselin, and Nick C. Fox. 2010. "Head Size, Age and Gender Adjustment in MRI Studies: A Necessary Nuisance?" *NeuroImage* 53 (4): 1244–55.)

(4) Is your method a type of VBM technique?

Yes.

(5) Line 168, why use a linear support vector machine (SVM)? Did you consider to use kernel SVMs?

We have included an SVM with a RBF kernel for comparison. Please see Figure 3.

(6) Some AD detection methods could be discussed, see "Multivariate approach for Alzheimer's disease detection using stationary wavelet entropy and predator-prey particle swarm optimization" and "Single Slice based Detection for Alzheimer's disease via wavelet entropy and multilayer perceptron trained by biogeography-based optimization"

The suggested papers by reviewer #1 describe detection of patients with AD dementia from healthy controls. Since the focus of our current paper is to detect progression to AD dementia in patients with MCI from those who will remain cognitively stable, we do not think papers about classifying AD vs controls are as relevant as those that focus on progressors vs non-progressors, which we have discussed at length.

(7) How do you optimize the hyperparameters of SVM?

The hyperparameters of the SVM were optimized by a cross-validated grid search over a parameter grid. See "Prediction of high confidence AD dementia cases in ADNI1" under the "Materials and methods" section, pages 7-8.

(8) What type of t-test did you use? How did you set the confidence threshold? Did you use ANOVA?

Yes, ANOVAs were used. Tukey's HSD tests were done for the pairwise post-hoc t-tests. See "Statistical tests of association of progression, AD biomarkers, and risk factors in high confidence MCI subjects" under the "Materials and methods" section, pages 10-11.

(9) How do you combine and generate the final signature?

The third signature (VCOG) was generated by including the VBM structural subtype weights, cognitive assessment scores, mean gray matter volume, total intracranial volume, age, and sex as features into the linear SVM on ADNI1 subjects to classify AD vs controls. This process was repeated across many random subsamples, after which hit probabilities for all individual subjects were calculated. A logistic regression classifier, with L1 regularization on the coefficients, was then used to classify the subjects with 100% hit probability from everyone else. Please refer to "Prediction of high confidence AD dementia cases in ADNI1" under the "Materials and methods" section, pages 7-8.

Reviewer #2 comments:

-The aim of this manuscript was to explore whether a linear model based classifier of AD could identify MCI patients with a "highly predictive signature" of AD and whether this represents a prodromal stage of AD by investigating how the HPS relates to genetic and phenotypic information. This is an interesting manuscript, however there are multiple opportunities for improvement, mostly with regard to justification of the 2-stage linear model, over a single stage logistic regression model.

There are two justifications for using the two-stage linear model. First, by construction,

it focuses on patients for which the outcome of the stage 1 model is highly stable. Stability of prediction is valuable when selecting participants, as we would not want the inclusion criteria of a study to vary substantially based on the specific sample used to train the model. Second, by achieving stability, the two-stage model also naturally falls in a regime of high specificity. We could have used a different approach, such as thresholding the confidence score generated by the SVM, as was done by Korolev et al. (2016). But it would have required in any case the selection of an arbitrary threshold. We explain our choice of using the two-stage model in Table 1 under Objective 2b and on pages 7-8 under "Prediction of high confidence AD dementia cases in ADNI1" in the Methods section.

-Page 6: Prediction of easy AD dementia cases in ADNI1

This section is difficult for the reader to follow. e.g. what is meant by "20% test size"? 5 fold CV?

Maybe a diagram would help to explain what is meant here.

Also this section would benefit from an explanation of the purpose of the 2-stage linear model prediction.

We used a random permutation cross-validator to split the data into 50 training and test sets, where the size of the test set was always 20% of the original sample size. This is clarified on pages 7-8 under "Prediction of high confidence AD dementia cases in ADNI1".

We have added to this section on pages 7-8 an explanation of the two-stage model: "We then used a two-step method to select an operating point for the linear SVM to obtain a highly precise and specific classification [20]. This was done by replicating the SVM prediction via subsampling and identifying the patients with highly robust prediction outcomes, i.e. who are consistently identified as AD during testing, regardless of the training subsample and the validity of the prediction. This approach was found to lead in practice to prediction that achieve high specificity, in addition to offering a guarantee of robustness; see [20] for more information."

-Page 6: Prediction of progression to AD dementia from the MCI stage in ADNI1

Line 191: "We re-trained our models on AD vs CN after

optimizing our hyperparameters (resampling size and resampling ratio)"

Its not clear what is meant here and also why resampling size is a hyperparameter of the model.

We have clarified the text and changed the terms resampling size and resampling ratio to number of subsamples and subsample size, respectively. We varied the number of subsamples and the subsample size to perturb the model and identify subjects that had robust outcomes during the testing phase regardless of the training subsample. Please refer to page 9 in the Methods section under "Prediction of progression to AD dementia from the MCI stage in ADNI1".

-Page 10, Line 311: "The HPS models consistently outperformed the base SVM classifiers with respect to

specificity ( $p < 0.001$ )" Its not clear if this is a meaningful comparison (see Fig. 2 comment below)

Figure 2: Is this the most appropriate way of plotting this data? Might it be more meaningful to assess the model using the AUC of an ROC curve?

From this graph it looks as if the HPS model might be worse than the base classifier.

ROC curves have been added in a new figure (Figure 3) and AUC is reported within this figure.

-Also - naming the model HPS is confusing given the grouping of subjects into HPS, non-HPS etc.

We now refer to the HPS+ subjects as high confidence subjects and non-HPS+ as low confidence subjects.

-Page 14, Line 417 "The high specificity of our two-stage model indeed came at a cost of reduced sensitivity"

There is always a trade of between sensitivity and specificity that is not acknowledged

here.

We have included a section that discusses the trade-off between sensitivity and specificity in the results: "Trade-off between sensitivity and specificity of different algorithms" on page 16. We also emphasize more this important trade-off in the abstract, introduction and the summary table of objectives, experiments and results (Table 1).

-Page 14, Line 423 "The two-stage prediction model offered the advantage of a principled approach to train the prediction model in a high-specificity regime, based on stability."

It is unclear what "high-specificity regime" means and why the 2-stage model relates to stability.

By "high specificity regime", we were referring to an operating point along the ROC curve where specificity is much higher compared to sensitivity. The two-stage model ensures high specificity (at a cost to sensitivity) as it selects the most robust (or stable) individuals after subsampling many times and identifying the subjects that are consistently identified as targets across the training subsamples. Please see "Prediction of high confidence AD dementia cases in ADNI1" under the Methods section on pages 7-8.

Reviewer #3 comments:

This study investigated a machine learning approach to identify high-risk MCI patients using five neuropsychological measures and structural MRI (sMRI). By combining the neuropsychological and sMRI features, the authors identified pMCI patients with 80.4% positive predictive value (PPV) in ADNI1 cohort and 87.8% PPV in ADNI2 cohort. While specificity of the proposed algorithm is high (>95%), sensitivity of the algorithm is fairly low (47.3% for ADNI2). This study addressed an important topic in Alzheimer disease which is to identify high-risk MCI patients. In addition, the manuscript was written well with clear descriptions for the methods and results. However, the novelty of this study is limited. The following comments need to be addressed.

- The emphasis of this study was to achieve a large value for PPV (and specificity) in identification of pMCI patients, but low sensitivity of the proposed algorithm was the cost of this achievement. The authors mentioned that expensive clinical trials can benefit from the proposed algorithm since false positives need to be minimized in this setting. However, this application of the proposed algorithm is arguable in that only a subset of pMCI patients (~50% of pMCI referring to ~50% sensitivity) will be identified by the algorithm and including only these extreme pMCI cases may cause a bias in results of the clinical trials.

Clinical trial inclusion criteria are typically designed to be restrictive in the aims of achieving a specific and homogenous subpopulation, therefore implementing an automatic algorithm that will maximize PPV and specificity to select individuals will help clinical trials achieve their recruitment goals in a cost and time-efficient manner.

- This study has a limited novelty which is to develop an algorithm to provide a high PPV in identification of pMCI patients, in the cost of low sensitivity. There are several studies investigated classification of pMCI and sMCI using neuroimaging (e.g. sMRI and resting-state fMRI) and/or neuropsychological measures (e.g. [Suk et al., 2014, Neuroimage 101, 569-582] and [Hojjati et al., 2018, Comput Biol Med 102, 30-39]). In fact, the authors compared PPV of their algorithm with that of only three previous studies [7-9], and two of these studies were performed by themselves. I recommend to expand this section of discussion by comparing results of the proposed algorithm (i.e. PPV, sensitivity, and specificity) with that of other machine learning studies that used sMRI (or resting-state fMRI) and/or neuropsychological measures as input features.

Other machine learning studies that used imaging and neuropsychological measures as features were indeed missing in our citations. We have expanded the list of cited works in the revision (see references #7,8,10-16). We thank the reviewer for noticing this error.

- Please add a table and summarize results of Figure 2. Please also add accuracy

|                                                                                                                                                                                                                                                                                                                                                                                                                                                 |                                                                                                                                                                                                                                                                                                                                                                                                                                                                                                                                                                                                                                                                                                                                                                                                                                                                                                                                                                                                                                                                                                                                                                                                                                                                               |
|-------------------------------------------------------------------------------------------------------------------------------------------------------------------------------------------------------------------------------------------------------------------------------------------------------------------------------------------------------------------------------------------------------------------------------------------------|-------------------------------------------------------------------------------------------------------------------------------------------------------------------------------------------------------------------------------------------------------------------------------------------------------------------------------------------------------------------------------------------------------------------------------------------------------------------------------------------------------------------------------------------------------------------------------------------------------------------------------------------------------------------------------------------------------------------------------------------------------------------------------------------------------------------------------------------------------------------------------------------------------------------------------------------------------------------------------------------------------------------------------------------------------------------------------------------------------------------------------------------------------------------------------------------------------------------------------------------------------------------------------|
|                                                                                                                                                                                                                                                                                                                                                                                                                                                 | <p>and AUC to this table.</p> <p>We have added ROC curves as a figure (Figure 3) and AUC are now reported there. Accuracy has now been included in Figure 2 and the results have been summarized on pages 13-15 under the sections "Prediction of AD dementia vs cognitively normal individuals", "Identification of high confidence cases for prediction", and "High confidence prediction of progression to AD dementia".</p> <p>Minor points:</p> <ul style="list-style-type: none"> <li>- Line# 132: Please correct "with with" - done</li> <li>- Line# 146: I recommend replacing "n subject x n subtype" to "n subject x m subtype (n=377 and m = 7)" - done</li> <li>- Line#147: Please spell out VBM. - done</li> <li>- Line# 185-186: "three highly predictive signatures (HPS)" in this sentence is confusing. What does the signature mean? Do you mean three models? If not, please define signature here.</li> </ul> <p>Yes we meant models and have added that in for clarification.</p> <ul style="list-style-type: none"> <li>- Figures, and in particular Figure 1, have a low quality.</li> </ul> <p>We believe the figures were downsampled during the PDF build, but we changed the final format of the figures (from TIFF to PDF) for this revision.</p> |
| <b>Additional Information:</b>                                                                                                                                                                                                                                                                                                                                                                                                                  |                                                                                                                                                                                                                                                                                                                                                                                                                                                                                                                                                                                                                                                                                                                                                                                                                                                                                                                                                                                                                                                                                                                                                                                                                                                                               |
| <b>Question</b>                                                                                                                                                                                                                                                                                                                                                                                                                                 | <b>Response</b>                                                                                                                                                                                                                                                                                                                                                                                                                                                                                                                                                                                                                                                                                                                                                                                                                                                                                                                                                                                                                                                                                                                                                                                                                                                               |
| Are you submitting this manuscript to a special series or article collection?                                                                                                                                                                                                                                                                                                                                                                   | No                                                                                                                                                                                                                                                                                                                                                                                                                                                                                                                                                                                                                                                                                                                                                                                                                                                                                                                                                                                                                                                                                                                                                                                                                                                                            |
| <p><b>Experimental design and statistics</b></p> <p>Full details of the experimental design and statistical methods used should be given in the Methods section, as detailed in our <a href="#">Minimum Standards Reporting Checklist</a>. Information essential to interpreting the data presented should be made available in the figure legends.</p> <p>Have you included all the information requested in your manuscript?</p>              | Yes                                                                                                                                                                                                                                                                                                                                                                                                                                                                                                                                                                                                                                                                                                                                                                                                                                                                                                                                                                                                                                                                                                                                                                                                                                                                           |
| <p><b>Resources</b></p> <p>A description of all resources used, including antibodies, cell lines, animals and software tools, with enough information to allow them to be uniquely identified, should be included in the Methods section. Authors are strongly encouraged to cite <a href="#">Research Resource Identifiers</a> (RRIDs) for antibodies, model organisms and tools, where possible.</p> <p>Have you included the information</p> | Yes                                                                                                                                                                                                                                                                                                                                                                                                                                                                                                                                                                                                                                                                                                                                                                                                                                                                                                                                                                                                                                                                                                                                                                                                                                                                           |

|                                                                                                                                                                                                                                                                                                                                                                                                                                                                                                                                                         |            |
|---------------------------------------------------------------------------------------------------------------------------------------------------------------------------------------------------------------------------------------------------------------------------------------------------------------------------------------------------------------------------------------------------------------------------------------------------------------------------------------------------------------------------------------------------------|------------|
| <p>requested as detailed in our <a href="#">Minimum Standards Reporting Checklist</a>?</p>                                                                                                                                                                                                                                                                                                                                                                                                                                                              |            |
| <p><b>Availability of data and materials</b></p> <p>All datasets and code on which the conclusions of the paper rely must be either included in your submission or deposited in <a href="#">publicly available repositories</a> (where available and ethically appropriate), referencing such data using a unique identifier in the references and in the “Availability of Data and Materials” section of your manuscript.</p> <p>Have you have met the above requirement as detailed in our <a href="#">Minimum Standards Reporting Checklist</a>?</p> | <p>Yes</p> |

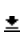

[Click here to view linked References](#)

# A highly predictive signature of cognition and brain atrophy for progression to Alzheimer's dementia

Short running title: Signature of future Alzheimer's dementia

Angela Tam<sup>1,2,3,†</sup>, Christian Dansereau<sup>1,4</sup>, Yasser Itturia-Medina<sup>3</sup>, Sebastian Urchs<sup>3</sup>, Pierre Orban<sup>1,5,6</sup>, Hanad Sharmarke<sup>1</sup>, John Breitner<sup>2,3</sup>, Pierre Bellec<sup>1,4,†</sup>, for the Alzheimer's Disease Neuroimaging Initiative\*

1. Centre de Recherche de l'Institut Universitaire de Gériatrie de Montréal, Montréal, CA
2. Douglas Hospital Research Centre, McGill University, Montréal, CA
3. McGill University, Montréal, CA
4. Département d'Informatique et de recherche opérationnelle, Université de Montréal, Montréal, CA
5. Centre de Recherche de l'Institut Universitaire en Santé Mentale de Montréal, Montréal, CA
6. Département de Psychiatrie, Université de Montréal, Montréal, CA

\*Data used in preparation of this article were obtained from the Alzheimer's Disease Neuroimaging Initiative (ADNI) database ([adni.loni.usc.edu](http://adni.loni.usc.edu)). As such, the investigators within the ADNI contributed to the design and implementation of ADNI and/or provided data but did not participate in analysis or writing of this report. A complete listing of ADNI investigators can be found at: [http://adni.loni.usc.edu/wp-content/uploads/how\\_to\\_apply/ADNI\\_Acknowledgement\\_List.pdf](http://adni.loni.usc.edu/wp-content/uploads/how_to_apply/ADNI_Acknowledgement_List.pdf)

†Corresponding authors:

[angela.tam@mail.mcgill.ca](mailto:angela.tam@mail.mcgill.ca)

[pierre.bellec@criugm.qc.ca](mailto:pierre.bellec@criugm.qc.ca)

4545 Queen Mary Rd

Montreal QC

Canada H3W 1W6



1  
2  
3  
4  
5  
6  
7  
8  
9  
10  
11  
12  
13  
14  
15  
16  
17  
18  
19  
20  
21  
22  
23  
24  
25  
26  
27  
28  
29  
30  
31  
32  
33  
34  
35  
36  
37  
38  
39  
40  
41  
42  
43  
44  
45  
46  
47  
48  
49  
50  
51  
52  
53  
54  
55  
56  
57  
58  
59  
60  
61  
62  
63  
64  
65

**Abstract**

Clinical trials in Alzheimer’s disease need to enroll patients whose cognition will decline over time, if left untreated, in order to demonstrate the efficacy of an intervention. Machine learning models used to screen for patients at risk of progression to dementia should therefore favor specificity (detecting only progressors) over sensitivity (detecting all progressors), especially when the prevalence of progressors is low. Here, we explore whether such high-risk patients can be identified using cognitive assessments and structural neuroimaging, by training machine learning tools in a high specificity regime. A multimodal signature of Alzheimer's dementia was first extracted from ADNI1. We then validated the predictive value of this signature on ADNI1 patients with mild cognitive impairment (N=235). The signature was optimized to predict progression to dementia over three years with low sensitivity (55.1%) but high specificity (95.6%), resulting in only moderate accuracy (69.3%) but high positive predictive value (80.4%, adjusted for a "typical" 33% prevalence rate of true progressors). These results were replicated in ADNI2 (N=235), with 87.8% adjusted positive predictive value (96.7% specificity, 47.3% sensitivity, 85.1% accuracy). We found that cognitive measures alone could identify high-risk individuals, with structural measurements providing a slight improvement. The signature had comparable receiver operating characteristics to standard machine learning tools, yet a marked improvement in positive predictive value was achieved over the literature by selecting a high specificity operating point. The multimodal signature can be readily applied for the enrichment of clinical trials.

**Keywords**

Alzheimer's disease, mild cognitive impairment, machine learning, neuroimaging, cognition

1  
2  
3  
4  
5  
6  
7  
8  
9  
10  
11  
12  
13  
14  
15  
16  
17  
18  
19  
20  
21  
22  
23  
24  
25  
26  
27  
28  
29  
30  
31  
32  
33  
34  
35  
36  
37  
38  
39  
40  
41  
42  
43  
44  
45  
46  
47  
48  
49  
50  
51  
52  
53  
54  
55  
56  
57  
58  
59  
60  
61  
62  
63  
64  
65

## Introduction

Alzheimer’s disease (AD), a leading cause of dementia, is marked by the abnormal accumulation of amyloid  $\beta$  ( $A\beta$ ) and hyperphosphorylated tau proteins in the brain, which leads to widespread neurodegeneration. AD has a long prodromal phase, and it has been difficult to predict which individuals will decline and experience AD dementia. While mild cognitive impairment (MCI) puts individuals at risk, only a fraction (33.6% on average) of MCI patients will develop dementia within a period of three years, as shown in a meta-analysis of 41 studies [1]. Identifying MCI patients who will progress to AD dementia with enough specificity has thus been a challenge for clinical trials [2]. This lack of prognostic power may be due to individual variability. Different clinical phenotypes have been described where patients will exhibit distinct cognitive deficits [3]. Previous work has also characterized neuropathological subtypes based on the distribution of neurofibrillary tangles [4], which correspond well to distinct patterns of brain atrophy [5]. Different subtypes of brain atrophy have also been associated with different rates of progression to dementia [6]. The implications for prognosis are profound: only a subgroup of patients will experience a sharp cognitive decline that can be reliably predicted. We therefore propose to identify a subset of individuals with a homogenous signature of brain atrophy and cognitive deficits who will progress to AD dementia with high precision.

There is a large field focused on using machine learning to automatically detect MCI patients who will progress to AD dementia based on imaging and cognitive features. For models combining structural MRI and cognition, state-of-the-art performance is 79% accuracy (76% specificity, 83% sensitivity) [7]. Some groups have achieved higher accuracies ranging from 82-97% when using other imaging methods, such as  $A\beta$  positron emission tomography [8] or resting-state functional MRI [9]. Although this increase in accuracy may suggest that  $A\beta$  imaging and resting-state functional MRI are better features, these imaging measures are more invasive, costly, and currently lack the large scale of validation of tools that are already widely used in clinical settings, such as cognitive assessments and structural MRI. Given the need to develop tools that will easily scale up in clinical settings, we propose to focus on predictive models that use structural imaging and cognition as features.

1  
2  
3 Models are typically trained to maximize accuracy, defined as the proportion of subjects that  
4  
5 were correctly identified, either as progressors or non-progressors. For enrichment in clinical trials, a  
6  
7 more relevant metric is positive predictive value (PPV), which is the proportion of subjects that  
8  
9 actually progress to dementia when they have been identified as such by the model. The PPV of a  
10  
11 model is dependent on the baseline rate of progression in the sample, with a typical rate (within three  
12  
13 years or more) in MCI patients being 33.6% [1]. Assuming a 33.6% baseline rate, it is possible to  
14  
15 calculate the PPVs of published models in the literature, based on reported sensitivity and specificity  
16  
17 scores. The adjusted PPV for models using cognitive and structural measures ranged from 50 to 75%  
18  
19 [7,8,10–16]. In other words, up to half of subjects who were identified as progressors by published  
20  
21 algorithms would not actually progress to dementia in a typical MCI sample. We therefore aimed to  
22  
23 adapt the training regimen of predictive models to favor specificity over sensitivity, with the hypothesis  
24  
25 that in this regime the models will identify progressors with high PPV. We expected that optimizing for  
26  
27 high specificity will result in a low number of false positives, which is particularly important when the  
28  
29 prevalence of progressors is low and therefore the susceptibility of the predictive model to identify  
30  
31 false positive progressors is high.  
32  
33  
34

35 The overall goal of this work was to develop a model to identify individuals who are at high  
36  
37 risk of progression to AD dementia with high PPV and specificity, using structural MRI and cognitive  
38  
39 features. We aimed to show that by training standard machine learning tools in a high specificity  
40  
41 regime, we can identify the most robust progressor MCI patients with high confidence. We further  
42  
43 wanted to assess whether those high risk individuals had prodromal AD, by examining longitudinal  
44  
45 cognitive decline, as well as A $\beta$  and tau burden in these individuals. We finally aimed to evaluate the  
46  
47 complementarity of features derived from cognition and atrophy patterns by examining the overlap of  
48  
49 high risk individuals who were identified as such by each modality. Although the complementarity of  
50  
51 cognitive and structural measures has been extensively studied for prognosis of dementia in a general  
52  
53 MCI population, the main contribution of this work is to examine their complementarity in the specific  
54  
55 context of a high risk signature which achieves high specificity and PPV, at the cost of low sensitivity  
56  
57  
58  
59  
60  
61  
62  
63  
64  
65

1  
2  
3 when the class of interest is relatively rare. Specific aims, as well as a summary of experiments and the  
4  
5 main results, are listed in Table 1.  
6  
7  
8  
9

## 10 Materials and methods

### 11 **Data**

12  
13  
14  
15  
16 Data used in the preparation of this article were obtained from the Alzheimer's Disease  
17  
18 Neuroimaging Initiative (ADNI) database ([adni.loni.usc.edu](http://adni.loni.usc.edu)). The ADNI was launched in 2003 as a  
19  
20 public-private partnership, led by Principal Investigator Michael W. Weiner, MD. The primary goal of  
21  
22 ADNI has been to test whether serial magnetic resonance imaging (MRI), positron emission  
23  
24 tomography (PET), other biological markers, and clinical and neuropsychological assessment can be  
25  
26 combined to measure the progression of mild cognitive impairment (MCI) and early Alzheimer's  
27  
28 disease (AD). For up-to-date information, see [www.adni-info.org](http://www.adni-info.org).  
29  
30

31 We took baseline T1-weighted MRI scans from the ADNI1 (228 CN, 397 MCI, 192 AD) and  
32  
33 ADNI2 (218 CN, 354 MCI, 103 AD) studies. For a detailed description of MRI acquisition details, see  
34  
35 <http://adni.loni.usc.edu/methods/documents/mri-protocols/>. All subjects gave informed consent to  
36  
37 participate in these studies, which were approved by the research ethics committees of the institutions  
38  
39 involved in data acquisition. Consent was obtained for data sharing and secondary analysis, the latter  
40  
41 being approved by the ethics committee at the CRIUGM. For the MCI groups, each individual must  
42  
43 have had at least 36 months of follow-up for inclusion in our analysis. We also further stratified the  
44  
45 MCI groups into stable (sMCI), who never received any change in their diagnosis, and progressors  
46  
47 (pMCI), who received a diagnosis of AD dementia within 36 months of follow-up. pMCI who  
48  
49 progressed to AD dementia after 36 months were excluded. After applying these inclusion/exclusion  
50  
51 criteria, we were left with 280 and 268 eligible MCI subjects in ADNI1 and ADNI2 respectively.  
52  
53  
54  
55  
56  
57  
58  
59  
60  
61  
62  
63  
64  
65

## Structural features from voxel-based morphometry

Images were processed with the NeuroImaging Analysis Kit (NIAK) version 0.18.1 (<https://hub.docker.com/r/simexp/niak-boss/>), the MINC toolkit (<http://bic-mni.github.io/>) version 0.3.18, and SPM12 (<http://www.fil.ion.ucl.ac.uk/spm/software/spm12/>) under CentOS with Octave (<http://gnu.octave.org>) version 4.0.2. Preprocessing of MRI data was executed in parallel on the Cedar supercomputer (<https://docs.computecanada.ca/wiki/Cedar>), using the Pipeline System for Octave and Matlab (PSOM) [21]. Each T1 image was linearly co-registered to the Montreal Neurological Institute (MNI) ICBM152 stereotaxic symmetric template [22], using the CIVET pipeline [23], and then re-oriented to the AC-PC line. Each image was segmented into grey matter, white matter, and CSF probabilistic maps. The DARTEL toolbox [24] was used to normalize the grey matter segmentations to a predefined grey matter template in MNI152 space. Each map was modulated to preserve the total amount of signal and smoothed with a 8 mm isotropic Gaussian blurring kernel. After quality control of the normalized grey matter segmentations, we were left with 621 subjects in ADNI1 (out of 700, 88.7% success rate) and 515 subjects in ADNI2 (out of 589, 87.4% success rate).

We extracted subtypes to characterize variability of grey matter distribution with the CN and AD samples from ADNI1. In order to reduce the impact of factors of no interest that may have influenced the clustering procedure, we regressed out age, sex, mean grey matter volume (GMV), and total intracranial volume (TIV), using a mass univariate linear regression model at each voxel. We then derived a spatial Pearson's correlation coefficient between all pairs of individual maps after confound regression. This defined a subject x subject (377 x 377) similarity matrix which was entered into a Ward hierarchical clustering procedure (Figure 1a). Based on visual inspection of the similarity matrix, we identified 7 subgroups (Figure 1b). Each subtype was defined as the average map of each subgroup. For each subject, we computed spatial correlations between their map and each subtype, which we call weights (Figure 1a). The weights formed a n subject x m subtypes (n=377, m=7) matrix, which was included in the feature space for all predictive models including voxel-based morphometry

1  
2  
3 (VBM) throughout this work. As in our previous works [20,25], we chose to use weights, which can be  
4  
5 interpreted as continuous measures for subtype affinity, over discrete subtype membership because the  
6  
7 latter is less informative as most individuals express similarity to multiple subtypes [26]. Note that  
8  
9 although we chose to present our findings with 7 subtypes, we examined how the number of subtypes  
10  
11 may impact our subsequent predictions. There was no significant difference in model performance  
12  
13 when we changed the number of subtypes (see Table S1 in supplementary material).  
14  
15

## 16 17 18 **Cognitive features**

19  
20 We took baseline neuropsychological scores for each subject from several cognitive domains:  
21  
22 memory from the composite score ADNI-MEM [27], executive function from the composite score  
23  
24 ADNI-EF [28], language from the Boston Naming Test (BNT), visuospatial from the clock drawing  
25  
26 test, and global cognition from the Alzheimer's Disease Assessment Scale-Cognitive (ADAS13). We  
27  
28 chose measures that span multiple cognitive domains as it has been suggested that the use of a  
29  
30 combination of neuropsychological measures is likely the best approach to predicting incipient  
31  
32 dementia [29]. These scores were included as features for the predictive models involving cognition.  
33  
34 Thirteen subjects across both ADNI1 and ADNI2 (8 AD, 5 MCI) had to be excluded due to missing  
35  
36 values in their cognitive assessments. See Table 2 for demographic information of subjects who were  
37  
38 included in analyses.  
39  
40  
41  
42  
43

## 44 **Prediction of high confidence AD dementia cases in ADNI1**

45  
46 We trained a linear support vector machine (SVM) model with a linear kernel, as implemented  
47  
48 by Scikit-learn [30] version 0.18 to classify AD vs CN from ADNI1 to get a baseline prediction  
49  
50 accuracy. We then used a two-step method to select an operating point for the linear SVM to obtain a  
51  
52 highly precise and specific classification [20]. This was done by replicating the SVM prediction via  
53  
54 subsampling and identifying the patients with highly robust prediction outcomes, i.e. who are  
55  
56 consistently identified as true AD cases (true positives) during testing, regardless of the training  
57  
58  
59  
60  
61  
62  
63  
64  
65

1  
2  
3 subsample. This approach was found, in practice, to lead to a highly specific prediction, in addition to  
4 offering a guarantee of robustness; see [20] for more information. Specifically here, a tenfold cross-  
5 validation loop was used to estimate the performance of the trained model. Classes were balanced  
6 inversely proportional to class frequencies in the input data for the training. A nested cross-validation  
7 loop (stratified shuffle split with 50 splits and 20% test size, i.e. a random permutation cross-validator  
8 was used to split the data into 50 training and test sets, where the size of the test set was always 20% of  
9 the original sample size) was used for the grid search of the SVM hyperparameter  $C$  (grid was  $10^{-2}$  to  
10  $10^1$  with 15 equal steps). We randomly selected subsamples of the dataset, retaining a set percentage of  
11 participants in each subsample. For each subsample, a separate SVM model was trained to predict AD  
12 or CN in ADNI1. The SVM training was replicated a number of times. Both the subsample size and the  
13 number of subsamples were selected to maximize the positive predictive value of the prediction of  
14 sMCI vs pMCI in ADNI1, as described below. Predictions were made on the remaining subjects that  
15 were not used for training, and, for each subject, we calculated a hit probability defined as the  
16 frequency of correct classification across all SVM replications in which the test set contained that  
17 subject. High confidence AD cases were defined as individuals with 100% hit probabilities with the  
18 AD label. Next, we trained a logistic regression classifier [31], with L1 regularization on the  
19 coefficients, to predict the high confidence AD cases. A stratified shuffle split (500 splits, 50% test  
20 size) was used to estimate the performance of the model for the grid search of the hyperparameter  $C$   
21 (grid was  $10^{-2}$  to  $10^1$  with 15 equal steps) on the overall ADNI1 sample, and the same hyperparameters  
22 were used for all SVM replications.  
23  
24  
25  
26  
27  
28  
29  
30  
31  
32  
33  
34  
35  
36  
37  
38  
39  
40  
41  
42  
43  
44  
45

46 We used the entire CN and AD sample from ADNI1 to obtain three highly predictive signatures  
47 (HPS) (i.e. models), 1) one using VBM subtype weights as features (VBM only), 2) one using only  
48 cognitive features (COG only), 3) and one using the combination of VBM subtype weights and  
49 cognitive features (VCOG). In all three signatures, age, sex, mean GMV, and TIV were also included  
50 as features.  
51  
52  
53  
54  
55  
56  
57  
58  
59  
60  
61  
62  
63  
64  
65

1  
2  
3  
4  
5  
6  
7  
8  
9  
10  
11  
12  
13  
14  
15  
16  
17  
18  
19  
20  
21  
22  
23  
24  
25  
26  
27  
28  
29  
30  
31  
32  
33  
34  
35  
36  
37  
38  
39  
40  
41  
42  
43  
44  
45  
46  
47  
48  
49  
50  
51  
52  
53  
54  
55  
56  
57  
58  
59  
60  
61  
62  
63  
64  
65

## **Prediction of progression to AD dementia from the MCI stage in ADNI1**

The logistic regression trained on AD vs CN was used to identify MCI patients who have a HPS of AD dementia in ADNI1. Our hyperparameters for this logistic regression were optimized based on the number of subsamples and subsample size that produced the maximum specificity and PPV for the classification of sMCI (n=89) vs pMCI (n=155) in ADNI1, while maintaining a minimum of 30% sensitivity. We varied the number of subsamples (100, 500, 1000) and subsample size (10%, 20%, 30%, 50%) to perturb the model and identify subjects that had robust outcomes during the testing phase regardless of the training subsample. We then re-trained our models to classify AD vs CN in ADNI1 with these optimized hyperparameters. This was done for all three signatures. In brief, we used the AD and CN sample from ADNI1 as a training set, and the MCI subjects from ADNI1 as a validation set. The ADNI2 sample was then used as an independent replication (test) set, to establish the performance of the two-stage model without further changes to the hyperparameters.

## **Statistical test of differences in model performance**

We used Monte-Carlo simulations to generate confidence intervals on the performance (i.e. accuracy, PPV, specificity and sensitivity) of both linear SVM and HPS models for their predictions of AD vs CN and pMCI vs sMCI. Taking the observed sensitivity and specificity, and using similar sample sizes to our experiment, we replicated the number of true and false positive detection 100000 times using independent Bernoulli variables, and derived replications of PPV, specificity and sensitivity. By comparing these replications to the accuracy, sensitivity, specificity and PPV observed in both models, we estimated a p-value for differences in model performance [32]. A p-value smaller than 0.05 was interpreted as evidence of a significant difference in performance, and 0.001 as strong evidence. We also used this approach to compare the performance of the combined features (VCOG) to the models containing VBM features (VBM) or cognitive features (COG) only. Note that, based on our



1  
2  
3 hypotheses regarding the behaviour of the HPS model, the tests were one-sided for increased accuracy,  
4  
5 specificity and PPV, and one-sided for decreased sensitivity.  
6

7 To assess the performance of the HPS models against standard machine learning algorithms, we  
8  
9 used four algorithms (SVM with a RBF kernel, K nearest neighbors, random forest, and Gaussian naive  
10  
11 Bayes) to train models to classify AD vs CN in the ADNI1 dataset. We then tested and validated these  
12  
13 models on classifying AD vs CN in ADNI2 and finally pMCI vs sMCI in both ADNI1 and ADNI2  
14  
15 separately. See the supplementary material for details of the implementations of these latter algorithms.  
16  
17 We then generated ROC curves and calculated the area under the curve (AUC) for each model and  
18  
19 classification (AD vs CN; pMCI vs sMCI) in both ADNI1 and ADNI2.  
20  
21  
22  
23

## 24 **Statistical tests of association of progression, AD biomarkers, and risk factors in high** 25 **confidence MCI subjects** 26 27

28  
29 Based on the classifications resulting from the linear SVM and HPS models, we separated the  
30  
31 MCI subjects into three different groups: 1) High confidence, subjects who were selected by the HPS  
32  
33 model as hits, 2) Low confidence, subjects who were selected by the linear SVM model as hits but  
34  
35 were not selected by the HPS model, and 3) Negative, subjects who were not selected as hits by either  
36  
37 algorithm.  
38

39  
40 In order to validate whether the high confidence subjects represented individuals who were in a  
41  
42 prodromal phase of AD, we tested if this subgroup was enriched for progression to dementia, APOE4  
43  
44 carriers, females, and subjects who were positive for A $\beta$  and tau pathology. Positivity of AD pathology  
45  
46 was determined by CSF measurements of A $\beta$  1-42 peptide and total tau with cut-off values of less than  
47  
48 192 pg/mL and greater than 93 pg/mL respectively [33]. We implemented Monte-Carlo simulations,  
49  
50 where we selected 100000 random subgroups out of the original MCI sample. By comparing the  
51  
52 proportion of progressors, APOE4 carriers, females, A $\beta$ -positive, and tau-positive subjects in these null  
53  
54 replications to the actual observed values in the HPS subgroup, we estimated a p-value [32] (one sided  
55  
56  
57  
58  
59  
60  
61  
62  
63  
64  
65

1  
2  
3 for increase). A p-value smaller than 0.05 was interpreted as evidence of a significant enrichment, and  
4  
5 0.001 as strong evidence.  
6

7 One-way ANOVAs were used to evaluate differences between the HPS groupings with respect  
8  
9 to age. Post-hoc Tukey's HSD tests were done to assess pairwise differences among the three classes  
10  
11 (high confidence, low confidence, negative). These tests were implemented in Python with the SciPy  
12  
13 library [34] version 0.19.1 and StatsModels library [35] version 0.8.0.  
14

15 To explore the impact of HPS grouping on cognitive trajectories, linear mixed effects models  
16  
17 were performed to evaluate the main effects of and interactions between the HPS groups and time on  
18  
19 ADAS13 scores up to 36 months of follow-up. The models were first fit with a random effect of  
20  
21 participant and then were fit with random slopes (time | participant) if ANOVAs comparing the  
22  
23 likelihood ratio suggested a significant improvement in model fit. All tests were performed separately  
24  
25 on the ADNI1 and ADNI2 datasets. These tests were implemented in R version 3.3.2 with the library  
26  
27 nlme version 3.1.128 [36].  
28  
29  
30  
31  
32

### 33 **Public code, data availability and reproducibility**

34  
35 The code used in this experiment is available on a GitHub repository  
36  
37 ([https://github.com/SIMEXP/vcog\\_hps\\_ad](https://github.com/SIMEXP/vcog_hps_ad)) and zenodo (<https://doi.org/10.5281/zenodo.1444081>).  
38  
39

40 We shared a notebook replicating all the machine learning experiments, starting after the  
41  
42 generation of VBM subtypes. However, in order to protect the privacy of the study participants, we  
43  
44 could not share individual subtype weights alongside other behavioural data and diagnostic  
45  
46 information. We thus created parametric (Gaussian) bootstrap simulations, based on group statistics  
47  
48 alone, that will allow interested readers to replicate results similar to those presented in this manuscript,  
49  
50 using the exact same code and computational environment that were used on real data, but with purely  
51  
52 synthetic data instead. The notebook can be executed online via the binder platform  
53  
54 (<http://mybinder.org>), and runs into a docker container  
55  
56 ([https://mybinder.org/v2/gh/SIMEXP/vcog\\_hps\\_ad/master?filepath=%2Fvcog\\_hpc\\_prediction\\_simulat](https://mybinder.org/v2/gh/SIMEXP/vcog_hps_ad/master?filepath=%2Fvcog_hpc_prediction_simulat)  
57  
58  
59  
60  
61  
62  
63  
64  
65

1  
2  
3 [ed\\_data.ipynb](#)), built from a configuration file that is available on GitHub  
4  
5 ([https://github.com/SIMEXP/vcog\\_hps\\_ad/blob/master/Dockerfile](https://github.com/SIMEXP/vcog_hps_ad/blob/master/Dockerfile)). The container itself is available on  
6  
7 Docker Hub ([https://hub.docker.com/r/simexp/vcog\\_hps\\_ad/](https://hub.docker.com/r/simexp/vcog_hps_ad/)). The simulated data was archived on  
8  
9 figshare  
10  
11 ([https://figshare.com/articles/Simulated\\_cognitive\\_and\\_structural\\_MRI\\_data\\_from\\_ADNI/7132757](https://figshare.com/articles/Simulated_cognitive_and_structural_MRI_data_from_ADNI/7132757)).

12  
13  
14 The simulation included the following 16 variables: age, sex, mean grey matter volume, total  
15  
16 intracranial volume, 5 cognitive assessment scores and 7 VBM subtype weights from both ADNI1 and  
17  
18 ADNI2. Subjects that had missing values for these variables were discarded from the simulation,  
19  
20 leaving N=1115 subjects. We stratified the population into 12 subgroups: the four clinical labels (AD,  
21  
22 pMCI, sMCI, CN), each further subdivided by the three prediction subclasses identified in this paper  
23  
24 (negative, low confidence, high confidence). For each subgroup, we estimated the average and  
25  
26 covariance matrices between the 16 variables of interest. We then generated a number of multivariate  
27  
28 normal data points that matched the number of subjects found in each subgroup, using the empirical  
29  
30 mean and covariance matrix of each subgroup. Finally, the range of the simulated data was clipped to  
31  
32 the range of the original real data, and the simulated sex data points were binarized by nearest  
33  
34 neighbour.  
35  
36

37  
38 The statistics from the predictive model in the original implementation are similar to that of the  
39  
40 simulated data. The model predicted the progression of dementia from MCI in ADNI1 with a PPV of  
41  
42 93.1% (specificity of 93.2%) on real data. This coincides with a 93.3% PPV (specificity of 94.3%) that  
43  
44 we get when using the simulated data. Similarly, with the ADNI2 dataset the model achieved a 81.3%  
45  
46 PPV (specificity of 96.7%) from the real data and a 75.7% PPV (specificity of 95.0%) from the  
47  
48 simulated data.  
49  
50  
51  
52

## 53 Results

### 54 Subtypes of brain atrophy

55  
56  
57  
58  
59  
60  
61  
62  
63  
64  
65

1  
2  
3 Subtype 1 was characterized by reduced relative GMV in the occipital, parietal and posterior  
4 temporal lobes. Subtype 2 displayed reduced relative GMV across the cortex, except for the medial  
5 parts of the parietal and occipital lobes and the cingulate. Subtype 3 had increased relative GMV in the  
6 medial and lateral temporal lobes, insula, and striatum. Subtype 4 had decreased relative GMV in the  
7 temporal lobes, inferior parietal lobes, posterior cingulate, and the prefrontal cortices. Subtype 5 was  
8 characterized by greater relative GMV in the temporal lobes, while Subtype 6 had the opposite pattern  
9 of reduced relative GMV in the temporal lobes. Subtype 7 displayed greater relative GMV in the  
10 parietal lobes, posterior lateral temporal lobes, medial temporal lobes, and medial occipital lobes. See  
11 Figure 1b for surface representations of the subtypes. Diagnosis (CN, sMCI, pMCI, AD) accounted for  
12 a substantial amount of variance in subtype weights for subtypes 1 ( $F=8.51$ ,  $p=1.30 \times 10^{-5}$ ), 2  
13 ( $F=10.32$ ,  $p=1.00 \times 10^{-6}$ ), 4 ( $F=14.53$ ,  $p=2.60 \times 10^{-9}$ ), 5 ( $F=13.86$ ,  $p=6.77 \times 10^{-9}$ ), 6 ( $F=34.27$ ,  $p=2.57$   
14  $\times 10^{-21}$ ), and 7 ( $F=37.02$ ,  $p=5.85 \times 10^{-23}$ ). Post-hoc t-tests showed AD subjects had significantly  
15 higher weights compared to CN (Figure 1b) for subtypes 1 ( $t=2.88$ ,  $p=0.02$ ), 2 ( $t=4.05$ ,  $p=3.0 \times 10^{-4}$ ), 4  
16 ( $t=4.83$ ,  $p<1.0 \times 10^{-4}$ ), and 6 ( $t=7.86$ ,  $p<1.0 \times 10^{-4}$ ), making these subtypes associated with a  
17 diagnosis of AD. CN subjects had significantly higher weights compared to AD for subtypes 5 ( $t=-$   
18  $4.86$ ,  $p<1.0 \times 10^{-4}$ ) and 7 ( $t=-6.95$ ,  $p<1.0 \times 10^{-4}$ ), making these subtypes associated with a cognitively  
19 normal status.

## 20 21 22 23 24 25 26 27 28 29 30 31 32 33 34 35 36 37 38 39 40 41 42 **Prediction of AD dementia vs cognitively normal individuals**

43  
44 The linear SVM model trained using the VCOG features achieved 94.5% PPV (95.6%  
45 specificity, 93.9% sensitivity, 94.9% accuracy) when classifying AD vs CN in ADNI1. Such high  
46 performance was expected given the marked cognitive deficits associated with clinical dementia. COG  
47 features only actually reached excellent performance as well (97.6% PPV, 98.0% specificity, 96.4%  
48 sensitivity, 97.3% accuracy), while using VBM features only yielded markedly lower performances  
49 (86.4% PPV, 89.3% specificity, 79.6% sensitivity, 84.8% accuracy) (see Figures 2 and ROC analysis in  
50 Figure 3). Note that the performance metrics in ADNI1 were estimated through cross-validation, and  
51  
52  
53  
54  
55  
56  
57  
58  
59  
60  
61  
62  
63  
64  
65

1  
2  
3 represent an average performance for several models trained on different subsets of ADNI1. We then  
4  
5 trained a model on all of ADNI1, and estimated its performance on an independent dataset, ADNI2.  
6  
7 Using VCOG predictors, the ADNI1 model reached 92.0% PPV (96.3% specificity, 92.0% sensitivity,  
8  
9 94.5% accuracy), when applied on ADNI2 AD vs CN data. Again the performance was comparable  
10  
11 with COG predictors only (92.2% PPV, 96.3% specificity, 94.3% sensitivity, 95.6% accuracy), and  
12  
13 VBM features only achieved lower performance (57.3% PPV, 79.8% specificity, 56.7% sensitivity,  
14  
15 72.3% accuracy) (see Figures 2 and ROC analysis in Figure 3). Note that PPV is dependent on the  
16  
17 proportion of patients and controls for a given sensitivity and specificity. Since the ADNI2 sample had  
18  
19 a substantially smaller proportion of AD subjects compared to ADNI1, the resulting PPV was reduced.  
20  
21 When we adjusted the baseline rate of AD subjects in ADNI2 to the same rate in ADNI1, the PPVs  
22  
23 were 95.2%, 95.3%, and 70.2% for the VCOG, COG, and VBM models respectively.  
24  
25  
26  
27  
28

### 29 **Identification of high confidence AD cases for prediction**

30  
31 The VCOG HPS model achieved 99.2% PPV (99.5% specificity, 77.6% sensitivity, 89.7%  
32  
33 accuracy) in classifying high confidence AD subjects in ADNI1. These performance scores were  
34  
35 estimated by cross-validation of the entire two-stage process (training of SVM, estimation of hit  
36  
37 probability, identification of HPS). However, the hyperparameters of the two-stage model were  
38  
39 optimized on classifying pMCI vs sMCI in ADNI1, as described previously. We next trained a single  
40  
41 model on all of ADNI1, which we applied on an independent sample (ADNI2). The ADNI1 AD VCOG  
42  
43 HPS model reached 98.6% PPV (99.5% specificity, 79.5% sensitivity, 93.1% accuracy) on ADNI2. As  
44  
45 was previously observed with the conventional SVM analysis, the VCOG HPS model had similar  
46  
47 performance to the COG HPS model (ADNI1: 100% PPV, 100% specificity, 87.3% sensitivity, 94.2%  
48  
49 accuracy; ADNI2: 98.7% PPV, 99.5% specificity, 88.6% sensitivity, 96.0% accuracy), and  
50  
51 outperformed the VBM HPS model (ADNI1: 92.3% PPV, 96.1% specificity, 54.6% sensitivity, 77.2%  
52  
53 accuracy; ADNI2: 65.2% PPV, 91.5% specificity, 33.3% sensitivity, 72.7% accuracy); see Figure 2.  
54  
55  
56  
57  
58  
59  
60  
61  
62  
63  
64  
65

1  
2  
3 When adjusted to the same baseline rate of AD subjects as ADNI1, the PPVs in ADNI2 were 99.2%,  
4 99.3%, and 76.7% for the VCOG, COG, and VBM HPS models respectively.  
5  
6  
7  
8

### 9 **High confidence prediction of progression to AD dementia**

10  
11 When using the full VCOG features, 87 MCI patients were selected as high confidence in  
12 ADNI1, out of which 81 (93.1% PPV) were pMCI within 36 months of follow-up. This represented a  
13 large, significant increase over the baseline rate of progressors in the entire ADNI1 MCI sample  
14 (37.4%) ( $p < 0.001$ ). This was also a significant increase over the SVM's predictions, where 83.9% of  
15 subjects that it had labeled as hits were true progressors ( $p < 0.001$ ). When adjusted to a 33.6% baseline  
16 rate of progressors, more typical of MCI populations, the PPV of high confidence subjects for  
17 prognosis of dementia was 80.4% (93.2% specificity, 55.1% sensitivity, 69.3% accuracy).  
18  
19  
20  
21  
22  
23  
24  
25  
26

27 We replicated these analyses in the MCI sample from ADNI2 (N=235). Using VCOG features,  
28 32 subjects were identified as high confidence, 26 of which progressed to AD dementia within 36  
29 months follow-up (81.2% PPV, specificity of 96.7%, sensitivity of 47.3%, 85.1% accuracy, 87.8%  
30 PPV adjusted to a 33.6% baseline rate). This represented a significantly higher prevalence than the  
31 30.6% baseline rate in the entire ADNI2 MCI cohort ( $p < 0.001$ ). This was also a significant increase  
32 over the SVM's predictions, where 67.8% of subjects it had labeled as hits were true progressors  
33 ( $p < 0.001$ ).  
34  
35  
36  
37  
38  
39  
40  
41

42 As in the classifications of AD vs CN, the VCOG HPS model tended to have higher  
43 performance compared to the VBM HPS (ADNI1: 89.9% specificity, 42.9% sensitivity, 60.5%  
44 accuracy, 87.7% PPV, 68.2% adjusted PPV; ADNI2: 90.1% specificity, 47.3% sensitivity, 80.2%  
45 accuracy, 59.1% PPV, 70.7% adjusted PPV) in classifying pMCI vs sMCI. The VCOG HPS also had  
46 similar performance compared to the COG HPS (ADNI1: 87.5% specificity, 64.6% sensitivity, 73.2%  
47 accuracy, 89.6% PPV, 72.3% adjusted PPV; ADNI2: 95.0% specificity, 56.4% sensitivity, 86.0%  
48 accuracy, 77.5% PPV, 85.1% adjusted PPV) for distinguishing between pMCI and sMCI. Notably, the  
49 VCOG features lead to higher PPV than VBM and COG features taken independently, both in ADNI1  
50  
51  
52  
53  
54  
55  
56  
57  
58  
59  
60  
61  
62  
63  
64  
65

1  
2  
3 and ADNI2. That increase was large and significant between VCOG and VBM (up to 17%) and  
4  
5 marginal and non-significant between VCOG and COG (up to 8%); see Figure 2.  
6  
7  
8  
9

### 10 11 **Trade-off between sensitivity and specificity of different algorithms**

12  
13 The HPS models consistently outperformed the linear SVM classifiers with respect to  
14  
15 specificity ( $p < 0.001$ ) in the classifications of AD vs CN and pMCI vs sMCI in both ADNI1 and  
16  
17 ADNI2, regardless of the features that the models contained. The HPS also had greater PPV ( $p < 0.05$ )  
18  
19 adjusted for a typical prevalence of 33.6% pMCI in a given sample of MCI subjects [1]. However,  
20  
21 these increases in specificity and PPV for the HPS model came at a significant cost of reduced  
22  
23 sensitivity compared to the linear SVM classifier, across all models in both ADNI1 and ADNI2  
24  
25 ( $p < 0.05$ ) (Figure 2). Note that this shift towards lower sensitivity and higher specificity and PPV could  
26  
27 be achieved by adjusting the threshold of the SVM analysis (see Figure 2 and ROC analysis in Figure  
28  
29 3), and is not unique to the two-stage procedure we implemented. This trade-off between sensitivity  
30  
31 and specificity is universal across machine learning algorithms and similar results can be achieved by  
32  
33 adjusting the prediction threshold of different strategies. As shown by the ROC curves and AUC values  
34  
35 in Figure 3, other machine learning algorithms (SVM with a radial basis function kernel, K nearest  
36  
37 neighbors, random forest, and Gaussian naive Bayes) also performed similarly to the HPS. Thus, the  
38  
39 value of the HPS is in the selection of a threshold point in order to operate in a high specificity regime.  
40  
41  
42  
43  
44  
45

### 46 **Characteristics of MCI subjects with a highly predictive VCOG signature of AD**

47  
48 High confidence MCI subjects with the VCOG signature were more likely to be progressors  
49  
50 (Figure 4a) compared to low confidence subjects and negative subjects (ADNI1:  $p < 0.001$ ; ADNI2:  
51  
52  $p < 0.001$ ). High confidence MCI subjects were also more likely to be APOE4 carriers (Figure 4b)  
53  
54 (ADNI1:  $p < 0.005$ ; ADNI2:  $p < 0.05$ ). There was no difference in sex across the HPS groupings in the  
55  
56 MCI subjects of either the ADNI1 or ADNI2 cohorts (Figure 4c). This was consistent with the whole  
57  
58  
59  
60  
61  
62  
63  
64  
65

1  
2  
3 sample, where there were equal proportions of progressors across both sexes in each dataset (ADNI1:  
4  $\chi^2=0.015$ ,  $p=0.90$ ; ADNI2:  $\chi^2=0.0002$ ,  $p=0.99$ ). The high confidence class was also significantly  
5 enriched for A $\beta$ -positive subjects in ADNI1 ( $p<0.05$ ). However, this result was not replicated in the  
6 ADNI2 MCI subjects (Figure 4d). Similarly with tau, we found a significant increase in tau-positive  
7 subjects in the high confidence group of ADNI1 ( $p<0.05$ ), but not in ADNI2 (Figure 4e). We found a  
8 significant age difference across the HPS classes in ADNI2 ( $F=5.68$ ,  $p<0.005$ ), where the high  
9 confidence subjects were older than the Negative subjects by a mean of 4.4 years. However, age did not  
10 differ across the HPS classes in ADNI1 (Figure 4f). Finally, high confidence subjects had significantly  
11 steeper cognitive declines compared to the low confidence and negative groups (Figure 4g): there were  
12 significant interactions between the HPS groupings and time in ADNI1: (high confidence  $\beta=-0.147$ ,  $t=-$   
13  $7.56$ ,  $p<0.001$ ; low confidence  $\beta=-0.055$ ,  $t=-2.46$ ,  $p<0.05$ ) and ADNI2 (high confidence  $\beta=-0.194$ ,  $t=-$   
14  $8.69$ ,  $p<0.001$ ; low confidence  $\beta=-0.072$ ,  $t=-3.31$ ,  $p=0.001$ ). The high confidence subjects in ADNI1  
15 and ADNI2 respectively gained 1.8 and 2.3 more points each year on the ADAS13 compared to the  
16 low confidence and negative groups. Note that higher scores on the Alzheimer's Disease Assessment  
17 Scale - Cognitive subscale (13 items) (ADAS13) represent worse cognitive function.

### 37 **COG, VBM and VCOG highly predictive signatures**

38  
39 The COG signature was mainly driven by scores from the ADAS13, which measures overall  
40 cognition, ADNI-MEM, a composite score that measures memory [27], and ADNI-EF, a composite  
41 score that measures executive function [37] (coefficients were 5.49, -4.80 and -2.50 respectively). In  
42 this model, sex, age, mean GMV, and TIV contributed very little, relative to the cognitive features  
43 (Figure 5b). Note that these coefficients should be interpreted as pseudo z-scores as the features had  
44 been normalized to zero mean and unit variance.

45  
46 Almost all grey matter subtypes contributed to the VBM signature. Mean GMV, subtype 1  
47 (reduced relative GMV in the occipital, parietal and posterior temporal lobes) and subtype 6 (reduced  
48 relative GMV in the temporal lobes, notably the medial temporal regions) had the highest weights in  
49  
50  
51  
52



1  
2  
3 the model (coefficients were -5.07, 4.87, and 3.98 respectively) (Figure 5c). We had anticipated the  
4  
5 larger contribution of these two subtypes as they have been described in previous AD subtyping work  
6  
7 [5,17–19].  
8

9  
10 The ADAS13, memory (ADNI-MEM) and executive function (ADNI-EF) scores contributed  
11  
12 the most to the VCOG signature (coefficients were 6.27, -7.43 and -3.95 respectively, Figure 5a). Of  
13  
14 the VBM features, subtypes 2, 3 and 7 contributed the most to the signature (coefficients were 1.36, -  
15  
16 2.12 and -2.83 respectively). Subtypes 1 and 6, which had the highest positive weights in the VBM  
17  
18 HPS model, were given marginal weights in the VCOG HPS model, which is potentially indicative of  
19  
20 redundancy with COG features. Note that the weights for subtypes 3 and 7 were negative in the model,  
21  
22 which means that predicted AD and pMCI cases had brain atrophy patterns that were spatially  
23  
24 dissimilar to those subtypes.  
25  
26

### 27 28 **Comparison of COG, VBM and VCOG high confidence subjects**

29  
30 We found substantial overlap of subjects labeled as high confidence in the MCI cohorts across  
31  
32 the VBM, COG and VCOG signatures (Figure 6). There were very few subjects that were labeled as  
33  
34 high confidence exclusively by the VCOG signature. As to be expected, the majority of subjects  
35  
36 labeled as high confidence by the VCOG signature (ADNI1: 97.7%; ADNI2: 100%) were also labeled  
37  
38 as high confidence by either the VBM only or COG only signatures or both. Of the subjects that were  
39  
40 labeled as high confidence by either the VBM only or COG only signatures or both. Of the subjects that were  
41  
42 labeled as high confidence by the VBM only signature, 23.6% and 55.2% in ADNI1 and ADNI2  
43  
44 respectively were identified exclusively by the VBM HPS. There were relatively few subjects (7 and 2  
45  
46 subjects in ADNI1 and ADNI2 respectively) that were captured by VBM and VCOG but missed by the  
47  
48 COG HPS. The COG HPS actually identified the majority of all high confidence subjects across the  
49  
50 three signatures (ADNI1: 106 of 132 total subjects, ADNI2: 40 of 65 total subjects). From Figure 6, we  
51  
52 can see that the VCOG HPS acts as a refinement of the COG signature, as the VCOG HPS captures a  
53  
54 subset of subjects that were labeled by the COG HPS.  
55  
56  
57  
58  
59  
60  
61  
62  
63  
64  
65

1  
2  
3 Out of the high confidence subjects labeled by all three signatures, 97.9% and 93.7% from  
4  
5 ADNI1 and ADNI2 respectively progressed to dementia (Supplementary Table S2). These subjects had  
6  
7 worse cognition based on the MMSE and higher proportions of APOE4 carriers, A $\beta$  positive and tau  
8  
9 positive individuals, compared to the baseline rates in all MCI subjects. Of the high confidence subjects  
10  
11 who were labeled only by the VBM model, 70.6% and 43.4% from ADNI1 and ADNI2 respectively  
12  
13 were progressors. This group of subjects had less A $\beta$  and tau positive individuals compared to the  
14  
15 baseline rates. Of the high confidence subjects who were labeled only the COG model, 70.4% and  
16  
17 57.1% from ADNI1 and ADNI2 respectively progressed to dementia. This group appeared to have a  
18  
19 greater proportion of A $\beta$  positive individuals compared to the baseline rates in both ADNI1 and ADNI2  
20  
21 cohorts. The majority of these COG high confidence subjects were also male. Given the distinct  
22  
23 characteristics among the exclusively COG, exclusively VBM, and VCOG high confidence subjects,  
24  
25 these groups may represent subgroups with different risks for AD dementia. As it appears that a greater  
26  
27 proportion of pMCI is captured when cognitive and structural MRI features are combined, these  
28  
29 findings may support joining multiple modalities together in order to achieve higher positive predictive  
30  
31 value. However, these results are qualitative and of an exploratory nature due to low sample sizes.  
32  
33  
34  
35  
36  
37

## 38 Discussion

39  
40  
41 We developed a MRI and cognitive-based model to predict AD dementia with high PPV and  
42  
43 specificity. Specifically, our two-stage predictive model reached 93.2% specificity and 93.1% PPV  
44  
45 (80.4% when adjusted for 33.6% prevalence of progressors) in ADNI1 when classifying progressor vs  
46  
47 stable MCI patients (within 3 years follow-up). We replicated these results in ADNI2 where the model  
48  
49 reached 96.7% specificity and 81.2% PPV (87.8% adjusted PPV). With respect to specificity and PPV,  
50  
51 these results are a substantial improvement over previous works combining structural MRI and  
52  
53 cognition on the same prediction task, that have reported up to 76% specificity and 65% PPV (adjusted  
54  
55 for 33.6% prevalence of progressors) [7]. Finally, our results also reproduced our past work which  
56  
57  
58  
59  
60  
61  
62  
63  
64  
65

1  
2  
3 developed a model that optimizes specificity and PPV [20]. However, it appears that a combination of  
4  
5 structural and functional MRI measures may lead to an improved prediction as two studies have  
6  
7 reported 90-100% PPV with these measures [9,20], with the limitation of smaller sample sizes (56 total  
8  
9 MCI subjects in [20], 86 total MCI subjects in [9]) due to the limited availability of functional MRI  
10  
11 data in ADNI. Our proposed signature is based on widely available measures, and can be readily tested  
12  
13 in many clinical trials. Functional MRI measures, by contrast, are only gaining traction in large clinical  
14  
15 studies, and will at the minimum require more time to get widely adopted, if the very high PPVs are  
16  
17 replicated in larger samples.  
18  
19

20 An ideal model to predict conversion to AD dementia would have both high sensitivity and  
21  
22 specificity. However, the pathophysiological heterogeneity of clinical diagnosis will prevent highly  
23  
24 accurate prediction linking brain features to clinical trajectories. We argue that, faced with  
25  
26 heterogeneity, it is necessary to sacrifice sensitivity to focus on a subgroup of individuals with similar  
27  
28 brain abnormalities. Due to the expected trade-off between specificity and sensitivity, the high  
29  
30 specificity of our two-stage model indeed came at a cost of reduced sensitivity (55.1% in ADNI1 and  
31  
32 47.3% in ADNI2 for classifying pMCI vs sMCI), which is much lower than sensitivity values of 64%-  
33  
34 95% reported by other groups [7,8,10–16]. The two-stage procedure did not offer gains compared to a  
35  
36 simpler SVM model, if the threshold of the SVM model could be selected *a priori* to match the  
37  
38 specificity of the two-stage procedure (see ROC curves in Figure 3). The two-stage prediction model  
39  
40 offered the advantage of a principled approach to train the prediction model in order to maximize  
41  
42 specificity, based on samples that are robust and easily classifiable, without testing a range of  
43  
44 prediction thresholds. The choice of a L1 regularized logistic regression also led to a compact and  
45  
46 interpretable subset of features for the HPS.  
47  
48  
49

50 Favoring specificity over sensitivity is useful in settings where false positives need to be  
51  
52 minimized and PPV needs to be high, such as expensive clinical trials. Here, with our VCOG HPS  
53  
54 model, we report the highest PPVs for progression to AD from the MCI stage (up to 87.8%, adjusted  
55  
56 for 33.6% prevalence of progressors) for models that included structural MRI and cognitive features,  
57  
58  
59  
60  
61  
62  
63  
64  
65

1  
2  
3 which are, importantly, modalities that are already widely used by clinicians. The present work could  
4  
5 be used as a screening tool for recruitment in clinical trials that target MCI subjects who are likely to  
6  
7 progress to dementia within three years. The implementation of an automated selection algorithm could  
8  
9 also result in groups of MCI subjects with more homogeneous brain pathology. However, we note that  
10  
11 high confidence subjects did not all present with significant amyloid burden (92.0% and 68.4% of high  
12  
13 confidence subjects in ADNI1 and ADNI2 respectively, Figure 4), which means that not all high  
14  
15 confidence individuals are likely to have prodromal AD, even when progressing to dementia.  
16  
17

18       When we trained our model with cognitive features only, tests for general cognition, memory,  
19  
20 and executive function were chosen as the strongest predictors of AD dementia. Our COG HPS model  
21  
22 thus supports previous research that reported general cognition, memory, and executive function as  
23  
24 important neuropsychological predictors of dementia [7,29,38,39]. Compared to the state-of-the-art  
25  
26 multi-domain cognition-based predictive model, which reported 87.1% specificity and 81.8% PPV  
27  
28 (77.5% when adjusted to 33.6% pMCI prevalence) [40], our COG HPS model achieved similar  
29  
30 performance reaching between 87.5%-95% specificity and 72.3%-85.1% (adjusted) PPV. As general  
31  
32 cognition was the strongest feature in our model to predict progression, this supports previous findings  
33  
34 that MCI patients with deficits across multiple domains are at the highest risk for dementia [39,41].  
35  
36

37       For our VBM model, we extracted a number of gray matter atrophy subtypes that recapitulated  
38  
39 previously reported subtypes, namely the medial temporal lobe and parietal dominant subtypes [5,17–  
40  
41 19], which were associated strongly with a diagnosis of AD dementia. Weights for the parietal  
42  
43 dominant and medial temporal lobe subtypes (Subtypes 1 and 6 from Figure 1b, respectively)  
44  
45 contributed substantially to the highly predictive signature in the VBM model. The atrophy pattern of  
46  
47 subtype 6 is spatially similar to the spread of neurofibrillary tangles in Braak stages III and IV [42],  
48  
49 which may support previous findings that tau aggregation mediates neurodegeneration [43]. The  
50  
51 contributions of the parietal dominant and medial temporal lobe subtypes in the VBM HPS model are  
52  
53 also in line with previous works, which have reported that cortical thickness and volumes of the medial  
54  
55  
56  
57  
58  
59  
60  
61  
62  
63  
64  
65

1  
2  
3 temporal lobes, inferior parietal cortex, and precuneus are strong predictors of progression to dementia  
4  
5 [7,11].  
6

7  
8 When combined with cognitive tests in the VCOG model, the structural subtypes were given  
9  
10 marginal weights. This suggests some redundancy between atrophy and cognition, and that cognitive  
11  
12 features have higher predictive power than structural features in the ADNI MCI sample. This  
13  
14 conclusion is consistent with the observation that the COG model significantly outperformed the VBM  
15  
16 model, similar to previous work [7]. Although cognitive markers were stronger features, the VCOG  
17  
18 model assigned large negative weights for the structural subtypes 3, which showed greater relative  
19  
20 GMV in the temporal lobes, and 7, which showed greater relative GMV in the parietal, occipital, and  
21  
22 temporal lobes. This means that these features were predictive of stable MCI in the VCOG model, in  
23  
24 line with previous work showing that atrophy in these regions is predictive of progression to dementia  
25  
26 [7,11]. Furthermore, we demonstrated that combining MRI data with cognitive markers significantly  
27  
28 improves upon a model based on MRI features alone. This result is again in line with the literature  
29  
30 [7,10], yet was shown for the first time for a model specifically trained for high PPV. Note that in the  
31  
32 current study, the predictive model was trained exclusively on images acquired on 1.5T scanners from  
33  
34 ADNI1. Good generalization to ADNI2 with 3T scanners demonstrates robustness of imaging  
35  
36 structural subtypes across scanner makes.  
37  
38

39  
40 The VCOG highly predictive signature might reflect a late disease stage. We looked at the ratio  
41  
42 of early to late MCI subjects in the ADNI2 sample (note that ADNI1 did not have early MCI subjects).  
43  
44 Of the MCI subjects identified as high confidence by the VCOG model, 84.4% were late MCI subjects,  
45  
46 compared to a rate of 34.9% of late MCI subjects in the entire ADNI2 MCI sample (Supplementary  
47  
48 Figure S1). This approach may not be optimal for early detection of future cognitive decline. Training a  
49  
50 model to classify MCI progressors and non-progressors to dementia could be done in order to capture  
51  
52 future progressors in earlier preclinical stages (e.g. early MCI). Finally, we focused on structural MRI  
53  
54 and neuropsychological batteries as features in our models due to their wide availability and established  
55  
56 status as clinical tools. However, we believe adding other modalities such as PET imaging, CSF  
57  
58  
59  
60  
61  
62  
63  
64  
65

1  
2  
3 markers, functional MRI, genetic factors, or lifestyle factors could result in higher predictive power,  
4  
5 especially at earlier preclinical stages of AD.  
6  
7  
8  
9

## 10 **Conclusion**

11  
12  
13  
14 In summary, we found a subgroup of patients with MCI who share a signature of cognitive  
15  
16 deficits and brain atrophy, that put them at very high risk to progress from MCI to AD dementia within  
17  
18 a time span of three years. We validated the signature in two separate cohorts that contained both stable  
19  
20 MCI patients and MCI patients who progressed to dementia. The model was able to predict progression  
21  
22 to dementia in MCI patients with up to 93.1% PPV and up to 96.7% specificity. The signature was  
23  
24 present in about half of all progressors, demonstrating that gains in PPV can be made by focusing on a  
25  
26 homogeneous, yet relatively common subgroup. Our model could potentially improve subject selection  
27  
28 in clinical trials and identify individuals at a higher risk of AD dementia for early intervention in  
29  
30 clinical settings.  
31  
32  
33  
34

## 35 **Competing interests**

36  
37  
38 The authors declare no conflicts of interest.  
39  
40  
41

## 42 **Acknowledgments**

43  
44 We thank Sylvia Villeneuve, Alexa Pichet-Binette and Jacob Vogel for providing us with data  
45  
46 to help start our preliminary analyses for this project. We thank Hien Nguyen for advising us on parts  
47  
48 of the statistical analyses.  
49  
50

51 Data collection and sharing for this project was funded by the Alzheimer's Disease  
52  
53 Neuroimaging Initiative (ADNI) (National Institutes of Health Grant U01 AG024904) and DOD ADNI  
54  
55 (Department of Defense award number W81XWH-12-2-0012). ADNI is funded by the National  
56  
57 Institute on Aging, the National Institute of Biomedical Imaging and Bioengineering, and through  
58  
59  
60  
61  
62  
63  
64  
65

1  
2  
3 generous contributions from the following: AbbVie, Alzheimer’s Association; Alzheimer’s Drug  
4  
5 Discovery Foundation; Araclon Biotech; BioClinica, Inc.; Biogen; Bristol-Myers Squibb Company;  
6  
7 CereSpir, Inc.; Cogstate; Eisai Inc.; Elan Pharmaceuticals, Inc.; Eli Lilly and Company; EuroImmun; F.  
8  
9 Hoffmann-La Roche Ltd and its affiliated company Genentech, Inc.; Fujirebio; GE Healthcare; IXICO  
10  
11 Ltd.; Janssen Alzheimer Immunotherapy Research & Development, LLC.; Johnson & Johnson  
12  
13 Pharmaceutical Research & Development LLC.; Lumosity; Lundbeck; Merck & Co., Inc.; Meso Scale  
14  
15 Diagnostics, LLC.; NeuroRx Research; Neurotrack Technologies; Novartis Pharmaceuticals  
16  
17 Corporation; Pfizer Inc.; Piramal Imaging; Servier; Takeda Pharmaceutical Company; and Transition  
18  
19 Therapeutics. The Canadian Institutes of Health Research is providing funds to support ADNI clinical  
20  
21 sites in Canada. Private sector contributions are facilitated by the Foundation for the National Institutes  
22  
23 of Health ([www.fnih.org](http://www.fnih.org)). The grantee organization is the Northern California Institute for Research  
24  
25 and Education, and the study is coordinated by the Alzheimer’s Therapeutic Research Institute at the  
26  
27 University of Southern California. ADNI data are disseminated by the Laboratory for Neuro Imaging at  
28  
29 the University of Southern California.  
30  
31

32  
33 The computational resources used to perform the data analysis were provided by Compute  
34  
35 Canada ([www.computecanada.org](http://www.computecanada.org)). This project was funded by NSERC grant number RN000028 and  
36  
37 the Canadian Consortium on Neurodegeneration in Aging (CCNA, [www.ccna-ccnv.ca](http://www.ccna-ccnv.ca)), through a  
38  
39 grant from the Canadian Institutes of Health Research and funding from several partners including  
40  
41 SANOFI-ADVENTIS R&D. AT was supported by a bursary from the Centre de recherche de l’institut  
42  
43 universitaire de gériatrie de Montréal and the Courtois foundation. CD was supported by a salary award  
44  
45 from the Lemaire foundation and Courtois foundation. PB was supported by a salary award from Fonds  
46  
47 de recherche du Québec -- Santé and the Courtois foundation.  
48  
49  
50

## 51 52 **References**

53  
54  
55  
56 1. Mitchell AJ, Shiri-Feshki M. Rate of progression of mild cognitive impairment to dementia - meta-  
57  
58 analysis of 41 robust inception cohort studies. *Acta Psychiatr Scand.* 2009;119:252–65.  
59  
60  
61

- 1  
2  
3 2. Visser P-J, Scheltens P, Verhey FRJ. Do MCI criteria in drug trials accurately identify subjects with  
4 pre-dementia Alzheimer's disease? *J Neurol Neurosurg Psychiatry*. 2005;76:1348–54.  
5  
6
- 7 3. Scheltens NME, Galindo-Garre F, Pijnenburg YAL, van der Vlies AE, Smits LL, Koene T, et al. The  
8 identification of cognitive subtypes in Alzheimer's disease dementia using latent class analysis. *J*  
9 *Neurol Neurosurg Psychiatry*. 2016;87:235–43.  
10  
11
- 12 4. Murray ME, Graff-Radford NR, Ross OA, Petersen RC, Duara R, Dickson DW.  
13 Neuropathologically defined subtypes of Alzheimer's disease with distinct clinical characteristics: a  
14 retrospective study. *Lancet Neurol*. 2011;10:785–96.  
15  
16
- 17 5. Hwang J, Kim CM, Jeon S, Lee JM, Hong YJ, Roh JH, et al. Prediction of Alzheimer's disease  
18 pathophysiology based on cortical thickness patterns. *Alzheimer's & dementia (Amsterdam,*  
19 *Netherlands)*. 2016;2:58–67.  
20  
21
- 22 6. Dong A, Toledo JB, Honnorat N, Doshi J, Varol E, Sotiras A, et al. Heterogeneity of  
23 neuroanatomical patterns in prodromal Alzheimer's disease: links to cognition, progression and  
24 biomarkers. *Brain*. 2017;140:735–47.  
25  
26
- 27 7. Korolev IO, Symonds LL, Bozoki AC, for the Alzheimer's Disease Neuroimaging Initiative.  
28 Predicting Progression from Mild Cognitive Impairment to Alzheimer's Dementia Using Clinical,  
29 MRI, and Plasma Biomarkers via Probabilistic Pattern Classification. *PLoS One*. 2016;11:e0138866–  
30 25.  
31  
32
- 33 8. Mathotaarachchi S, Pascoal TA, Shin M, Benedet AL, Kang MS, Beaudry T, et al. Identifying  
34 incipient dementia individuals using machine learning and amyloid imaging. *Neurobiol Aging*.  
35 2017;59:80–90.  
36  
37
- 38 9. Hojjati SH, Ebrahimzadeh A, Khazae A, Babajani-Feremi A, Alzheimer's Disease Neuroimaging  
39 Initiative. Predicting conversion from MCI to AD by integrating rs-fMRI and structural MRI. *Comput*  
40 *Biol Med*. 2018;102:30–9.  
41  
42
- 43 10. Moradi E, Pepe A, Gaser C, Huttunen H, Tohka J, Alzheimer's Disease Neuroimaging Initiative.  
44 Machine learning framework for early MRI-based Alzheimer's conversion prediction in MCI subjects.  
45 *Neuroimage*. 2015;104:398–412.  
46  
47
- 48 11. Eskildsen SF, Coupé P, García-Lorenzo D, Fonov V, Pruessner JC, Collins DL, et al. Prediction of  
49 Alzheimer's disease in subjects with mild cognitive impairment from the ADNI cohort using patterns  
50 of cortical thinning. *Neuroimage*. 2013;65:511–21.  
51  
52  
53  
54  
55  
56  
57  
58  
59  
60  
61  
62  
63  
64  
65



12. Wee C-Y, Yap P-T, Shen D, for the Alzheimer's Disease Neuroimaging Initiative. Prediction of Alzheimer's disease and mild cognitive impairment using cortical morphological patterns. *Hum Brain Mapp.* 2013;34:3411–25.
13. Gaser C, Franke K, Klöppel S, Koutsouleris N, Sauer H, for the Alzheimer's Disease Neuroimaging Initiative. BrainAGE in Mild Cognitive Impaired Patients: Predicting the Conversion to Alzheimer's Disease. *PLoS One.* 2013;8:e67346–15.
14. Davatzikos C, Bhatt P, Shaw LM, Batmanghelich KN, Trojanowski JQ. Prediction of MCI to AD conversion, via MRI, CSF biomarkers, and pattern classification. *NBA.* 2011;32:2322.e19–2322.e27.
15. Koikkalainen J, Lötjönen J, Thurfjell L, Rueckert D, Waldemar G, Soininen H, et al. Multi-template tensor-based morphometry: application to analysis of Alzheimer's disease. *Neuroimage.* 2011;56:1134–44.
16. Misra C, Fan Y, Davatzikos C. Baseline and longitudinal patterns of brain atrophy in MCI patients, and their use in prediction of short-term conversion to AD: Results from ADNI. *Neuroimage.* 2009;44:1415–22.
17. Noh Y, Jeon S, Lee JM, Seo SW, Kim GH, Cho H, et al. Anatomical heterogeneity of Alzheimer disease Based on cortical thickness on MRIs. *Neurology.* 2014;83:1936–44.
18. Park J-Y, Na HK, Kim S, Kim H, Kim HJ, Seo SW, et al. Robust Identification of Alzheimer's Disease subtypes based on cortical atrophy patterns. *Sci Rep.* 2017;7:43270.
19. Varol E, Sotiras A, Davatzikos C, Alzheimer's Disease Neuroimaging Initiative. HYDRA: Revealing heterogeneity of imaging and genetic patterns through a multiple max-margin discriminative analysis framework. *Neuroimage.* 2017;145:346–64.
20. Dansereau C, Tam A, Badhwar A, Urchs S, Orban P, Rosa-Neto P, et al. A brain signature highly predictive of future progression to Alzheimer's dementia. *arXiv preprint arXiv:1712.08058.* 2017;
21. Bellec P, Lavoie-Courchesne S, Dickinson P, Lerch JP, Zijdenbos AP, Evans A. The pipeline system for Octave and Matlab (PSOM): a lightweight scripting framework and execution engine for scientific workflows. *Front Neuroinform.* 2012;6:7.
22. Fonov V, Evans A, Botteron K, Almli CR, McKinstry RC, Collins DL. Unbiased average age-appropriate atlases for pediatric studies. *Neuroimage.* 2011;54:313–27.
23. Ad-Dab'bagh Y, Einarson D, Lyttelton O, Muehlboeck JS, Mok K, Ivanov O, et al. The CIVET image-processing environment: a fully automated comprehensive pipeline for anatomical neuroimaging

- 1  
2  
3 research. Proceedings of the 12th annual meeting of the organization for human brain mapping.  
4 2006;2266.  
5  
6  
7 24. Ashburner J. A fast diffeomorphic image registration algorithm. *Neuroimage*. 2007;38:95–113.  
8  
9  
10 25. Orban P, Tam A, Urchs S, Savard M, Madjar C, Badhwar A, et al. Subtypes of functional brain  
11 connectivity as early markers of neurodegeneration in Alzheimer’s disease. *bioRxiv*. 2017;195164.  
12  
13 26. Zhang X, Mormino EC, Sun N, Sperling RA, Sabuncu MR, Yeo BTT, et al. Bayesian model  
14 reveals latent atrophy factors with dissociable cognitive trajectories in Alzheimer’s disease. *Proc Natl*  
15 *Acad Sci U S A*. 2016;113:E6535–44.  
16  
17  
18 27. Crane PK, Carle A, Gibbons LE, Insel P, Mackin RS, Gross A, et al. Development and assessment  
19 of a composite score for memory in the Alzheimer’s Disease Neuroimaging Initiative (ADNI). *Brain*  
20 *Imaging Behav*. 2012;6:502–16.  
21  
22  
23 28. Gibbons LE, Carle AC, Mackin RS, Harvey D, Mukherjee S, Insel P, et al. A composite score for  
24 executive functioning, validated in Alzheimer’s Disease Neuroimaging Initiative (ADNI) participants  
25 with baseline mild cognitive impairment. *Brain Imaging Behav*. 2012;6:517–27.  
26  
27  
28  
29 29. Belleville S, Fouquet C, Hudon C, Zomahoun HTV, Croteau J, Consortium for the Early  
30 Identification of Alzheimer’s disease-Quebec. Neuropsychological Measures that Predict  
31 Progression from Mild Cognitive Impairment to Alzheimer’s type dementia in Older Adults: a  
32 Systematic Review and Meta-Analysis. *Neuropsychol Rev*. 2017;27:328–53.  
33  
34  
35 30. Pedregosa F, Varoquaux G, Gramfort A, Michel V, Thirion B, Grisel O, et al. Scikit-learn: Machine  
36 Learning in Python. *J Mach Learn Res*. 2011;2825–30.  
37  
38  
39 31. Fan R-E, Chang K-W, Hsieh C-J, Wang X-R, Lin C-J. LIBLINEAR: A library for large linear  
40 classification. *J Mach Learn Res*. 2008;9:1871–4.  
41  
42  
43  
44 32. Phipson B, Smyth GK. Permutation P-values should never be zero: calculating exact P-values when  
45 permutations are randomly drawn. *Stat Appl Genet Mol Biol*. 2010;9.  
46  
47  
48 33. Shaw LM, Vanderstichele H, Knapik-Czajka M, Clark CM, Aisen PS, Petersen RC, et al.  
49 Cerebrospinal fluid biomarker signature in Alzheimer’s disease neuroimaging initiative subjects. *Ann*  
50 *Neurol*. 2009;65:403–13.  
51  
52  
53 34. Jones E, Oliphant T, Peterson P. SciPy: open source scientific tools for Python,  
54 <http://www.scipy.org/>. 2001;  
55  
56  
57  
58  
59  
60  
61  
62  
63  
64  
65

- 1  
2  
3 35. Seabold S, Perktold J. Statsmodels: Econometric and statistical modeling with python. Proceedings  
4 of the 9th Python in Science Conference. SciPy society Austin; 2010.  
5  
6  
7 36. Pinheiro J, Bates D, DebRoy S, Sarkar D, R Core Team. nlme: linear and nonlinear mixed effects  
8 models. R package version 3.1-117, <https://CRAN.R-project.org/package=nlme>. 2018;  
9  
10  
11 37. Gibbons LE, Carle AC, Mackin RS, Harvey D, Mukherjee S, Insel P, et al. A composite score for  
12 executive functioning, validated in Alzheimer’s Disease Neuroimaging Initiative (ADNI) participants  
13 with baseline mild cognitive impairment. *Brain Imaging Behav.* 2012;6:517–27.  
14  
15  
16 38. Dickerson BC, Sperling RA, Hyman BT, Albert MS, Blacker D. Clinical prediction of Alzheimer  
17 disease dementia across the spectrum of mild cognitive impairment. *Arch Gen Psychiatry.*  
18 2007;64:1443–50.  
19  
20  
21 39. Tabert MH, Manly JJ, Liu X, Pelton GH, Rosenblum S, Jacobs M, et al. Neuropsychological  
22 prediction of conversion to Alzheimer disease in patients with mild cognitive impairment. *Arch Gen*  
23 *Psychiatry.* 2006;63:916–24.  
24  
25  
26 40. Belleville S, Gauthier S, Lepage É, Kergoat M-J, Gilbert B. Predicting decline in mild cognitive  
27 impairment: A prospective cognitive study. *Neuropsychology.* 2014;28:643–52.  
28  
29  
30 41. Mitchell J, Arnold R, Dawson K, Nestor PJ, Hodges JR. Outcome in subgroups of mild cognitive  
31 impairment (MCI) is highly predictable using a simple algorithm. *J Neurol.* 2009;256:1500–9.  
32  
33  
34 42. Braak H, Braak E. Neuropathological staging of Alzheimer-related changes. *Acta Neuropathol.*  
35 1991;82:239–59.  
36  
37  
38 43. Spillantini MG, Goedert M. Tau pathology and neurodegeneration. *Lancet Neurol.* 2013;12:609–  
39 22.  
40  
41  
42  
43  
44

## 45 **Figure captions**

46  
47  
48

49 **Figure 1.** Subtyping procedure and resulting subtypes. a) A hierarchical clustering procedure identified  
50 7 subtypes, or subgroups, of individuals with similar patterns of grey matter topography within the  
51 ADNI1 cohort of CN and AD subjects (top). A measure of spatial similarity, called subtype weight,  
52 between a single individual’s grey matter volume map and the average of a given subtype was  
53 calculated for all individuals and all subtypes (bottom). b) Maps of the 7 subtypes showing the  
54 distribution of grey matter across all voxels relative to the average. CN\* and AD\* denote significant  
55  
56  
57  
58  
59  
60  
61  
62  
63  
64  
65

1  
2  
3 associations between the subtype weights and diagnoses of cognitively normal (CN) or Alzheimer's  
4 dementia (AD) respectively.  
5  
6  
7

8 **Figure 2.** Accuracy, specificity, sensitivity, and positive predictive value (PPV) for different  
9 classifiers: linear SVM, highly predictive signature (HPS), and the linear SVM thresholded at 0.95  
10 (SVM 0.95), for the classifications of patients with AD dementia (AD) and cognitively normal  
11 individuals (CN) and patients with mild cognitive impairment who progress to AD (pMCI) and stable  
12 MCI (sMCI) in ADNI1 and ADNI2. VBM represents the model trained with VBM subtypes, COG  
13 represents the model trained with baseline cognitive scores, and VCOG represents the model trained  
14 with both VBM subtypes and cognition. Positive predictive value was adjusted (PPV (adj)) for a  
15 prevalence of 33.6% pMCI in a sample of MCI subjects for both ADNI1 and ADNI2 MCI cohorts.  
16 Significant differences are denoted by \* for  $p < 0.05$  and \*\* for  $p < 0.001$ .  
17  
18  
19  
20  
21  
22  
23  
24

25 **Figure 3.** Receiver operating characteristic (ROC) curves for various machine learning algorithms with  
26 different features (VBM for VBM subtypes only, COG for cognitive features only, VCOG for a  
27 combination of VBM subtypes and cognitive features). Algorithms included a support vector machine  
28 with a radial basis function kernel (RBF SVM), K nearest neighbors (KNN), random forest (RF),  
29 Gaussian naive Bayes (GNB), a support vector machine with a linear kernel representing the first stage  
30 (Linear SVM) of the two-stage predictive model, and the two-stage highly predictive signature (HPS).  
31 TPR refers to true positive rate, FPR refers to false positive rate, and AUC refers to area under the  
32 curve.  
33  
34  
35  
36  
37  
38  
39  
40

41 **Figure 4.** Characteristics of MCI subjects with the VCOG signature in ADNI1 and ADNI2. We show  
42 the percentage of MCI subjects who a) progressed to dementia, were b) APOE4 carriers, c) female, d)  
43 positive for A $\beta$  measured by a cut-off of 192 pg/mL in the CSF [22], and e) positive for tau measured  
44 by a cut-off of 93 pg/mL in the CSF [22] in each classification (High confidence, Low confidence, and  
45 Negative). f) Age and g) cognitive trajectories, measured by the Alzheimer's Disease Assessment Scale  
46 - Cognitive subscale with 13 items (ADAS13), across the three classes. Significant differences are  
47 denoted by \* for family-wise error rate-corrected  $p < 0.05$ .  
48  
49  
50  
51  
52  
53  
54

55 **Figure 5.** Coefficients of the high confidence prediction a) VCOG HPS model, b) COG HPS model, c)  
56 VBM HPS model. ADAS13=Alzheimer's Disease Assessment Scale - Cognitive, MEM=ADNI-MEM  
57  
58  
59  
60  
61  
62  
63  
64  
65

1  
2  
3  
4  
5  
6  
7  
8  
9  
10  
11  
12  
13  
14  
15  
16  
17  
18  
19  
20  
21  
22  
23  
24  
25  
26  
27  
28  
29  
30  
31  
32  
33  
34  
35  
36  
37  
38  
39  
40  
41  
42  
43  
44  
45  
46  
47  
48  
49  
50  
51  
52  
53  
54  
55  
56  
57  
58  
59  
60  
61  
62  
63  
64  
65

score; EXEC=ADNI-EF score, BNT=Boston Naming Test, CLOCK=clock drawing test, VBM 1-7=VBM subtype weights, GMV=mean grey matter volume, TIV=total intracranial volume.

**Figure 6.** Venn diagram depicting the number of MCI subjects labeled as high confidence by the VBM, COG, and VCOG HPS models in ADNI1 and ADNI2.

Table 1. Summary of objectives, experiments, and main findings

| Specific objectives                                                                                                                           | Experiments                                                                                                                                                                                                                         | Main findings                                                                                                                                                                                                                                                                |
|-----------------------------------------------------------------------------------------------------------------------------------------------|-------------------------------------------------------------------------------------------------------------------------------------------------------------------------------------------------------------------------------------|------------------------------------------------------------------------------------------------------------------------------------------------------------------------------------------------------------------------------------------------------------------------------|
| 1) Identify subtypes of brain atrophy patterns                                                                                                | We used unsupervised clustering on atrophy maps generated from structural images in AD and CN subjects.                                                                                                                             | Seven distinct patterns of atrophy were identified, some of which were strongly associated with a diagnosis of AD (Figure 1b).                                                                                                                                               |
| 2a) Replicate previous findings from works that used cognitive and structural features to predict progression to AD from MCI                  | A linear support vector machine, that was optimized for accuracy, was trained on the following features: 1) structural atrophy patterns, 2) multi-domain cognitive assessments, and 3) a combination of both.                       | The support vector machine based on cognitive features had higher predictive value than the structural MRI signature, similar to previous findings [7]. See Figures 2 and 3.                                                                                                 |
| 2b) Train a model in a high specificity regime to identify high confidence AD subjects with a high-risk signature                             | We used a two-stage algorithm to ensure we were maximizing specificity over sensitivity. We trained on the following features: 1) structural atrophy patterns, 2) multi-domain cognitive assessments, and 3) a combination of both. | The two-stage algorithm resulted in a model that achieved high specificity and high PPV, with reduced sensitivity (Figure 2). Three high-risk signatures were generated (Figure 5).                                                                                          |
| 3) Assess if the high-risk signature generated by the two-stage algorithm can identify progressors in MCI subjects within a three year period | We measured PPV, specificity, sensitivity, and accuracy of the model in predicting progressors in two separate MCI cohorts.                                                                                                         | The model achieved high specificity and high PPV, again at the cost of sensitivity and accuracy (Figures 2 and 4).                                                                                                                                                           |
| 4) Test the performance of the two-stage algorithm against standard algorithms                                                                | We compared the ROC performance of the two-stage algorithm against standard algorithms (e.g. KNN, GNB, SVM with a RBF kernel).                                                                                                      | The performance of the two-stage algorithm did not differ from standard algorithms, in terms of area under a ROC curve, but was the only one to operate in a high-specificity, low sensitivity regime (Figure 3).                                                            |
| 5) Validate whether this high-risk signature represents a prodromal phase of AD                                                               | We compared cognitive decline, amyloid and tau burden in tagged high-risk individuals against those who were not.                                                                                                                   | Tagged high-risk individuals experienced sharper cognitive decline and higher levels of amyloid and tau than non-tagged individuals (Figure 4).                                                                                                                              |
| 6) Assess the complementarity of cognitive and structural measures                                                                            | We examined whether there was overlap in the subjects that were identified by the three high-risk signatures.                                                                                                                       | The majority of subjects that were identified by the multimodal high-risk signature had been identified as such by the unimodal cognitive and unimodal structural signatures. The unimodal cognitive signature identified the majority of all high-risk subjects (Figure 6). |

Table 2. Demographic information for post-QC subjects in ADNI1 and ADNI2

| <b>ADNI1</b>       | <b>CN</b>  | <b>sMCI</b> | <b>pMCI</b> | <b>AD</b>  |
|--------------------|------------|-------------|-------------|------------|
| <b>N</b>           | 205        | 88          | 147         | 165        |
| <b>Age ± SD</b>    | 76.1 ± 5.0 | 74.0 ± 7.6  | 74.3 ± 7.1  | 75.4 ± 7.5 |
| <b>Female %</b>    | 51.7       | 40.9        | 40.8        | 51.5       |
| <b>APOE4+ %</b>    | 27.8       | 37.5        | 68.7        | 65.4       |
| <b>ADAS13 ± SD</b> | 9.5 ± 4.3  | 14.3 ± 5.5  | 21.3 ± 5.3  | 28.6 ± 7.1 |
| <b>MMSE ± SD</b>   | 29.1 ± 1.0 | 27.7 ± 1.7  | 26.7 ± 1.7  | 23.4 ± 2.0 |
| <b>ADNI2</b>       | <b>CN</b>  | <b>sMCI</b> | <b>pMCI</b> | <b>AD</b>  |
| <b>N</b>           | 188        | 180         | 55          | 89         |
| <b>Age ± SD</b>    | 72.8 ± 6.1 | 70.8 ± 7.3  | 72.1 ± 7.1  | 74.4 ± 7.8 |
| <b>Female %</b>    | 54.0       | 47.8        | 49.1        | 46.1       |
| <b>APOE4+ %</b>    | 29.4       | 35.6        | 65.4        | 71.3       |
| <b>ADAS13 ± SD</b> | 9.1 ± 4.2  | 11.8 ± 5.3  | 21.4 ± 6.5  | 31.6 ± 8.7 |
| <b>MMSE ± SD</b>   | 29.1 ± 1.1 | 28.4 ± 1.6  | 27.3 ± 1.9  | 23.1 ± 2.3 |

ADAS13=Alzheimer's Disease Assessment Scale - Cognitive subscale (13 items);

MMSE=Mini Mental State Examination

Figure 1

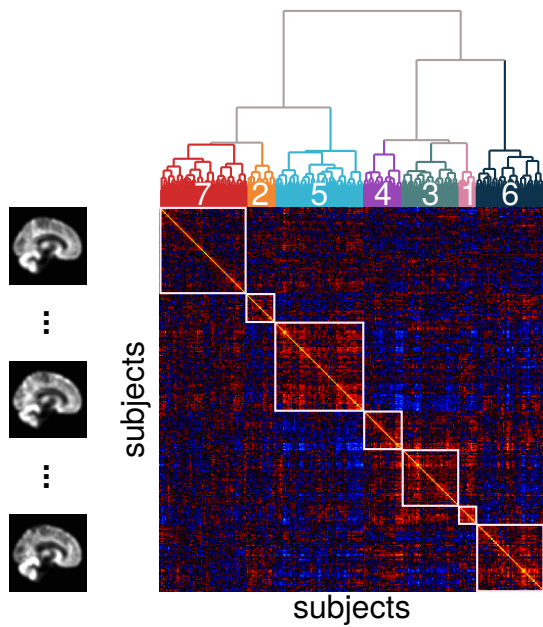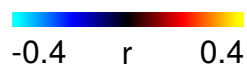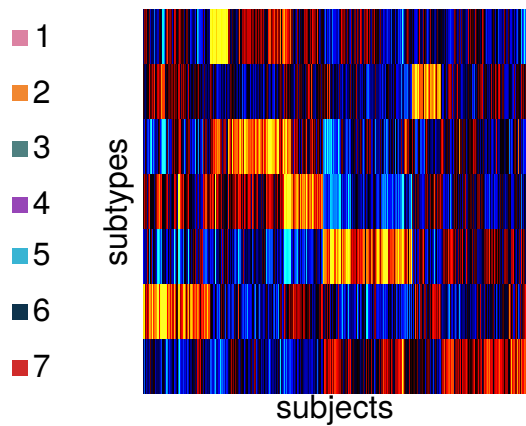

b) [Click here to access/download:Figure;f1\\_methods\\_subtypes.pdf](#)

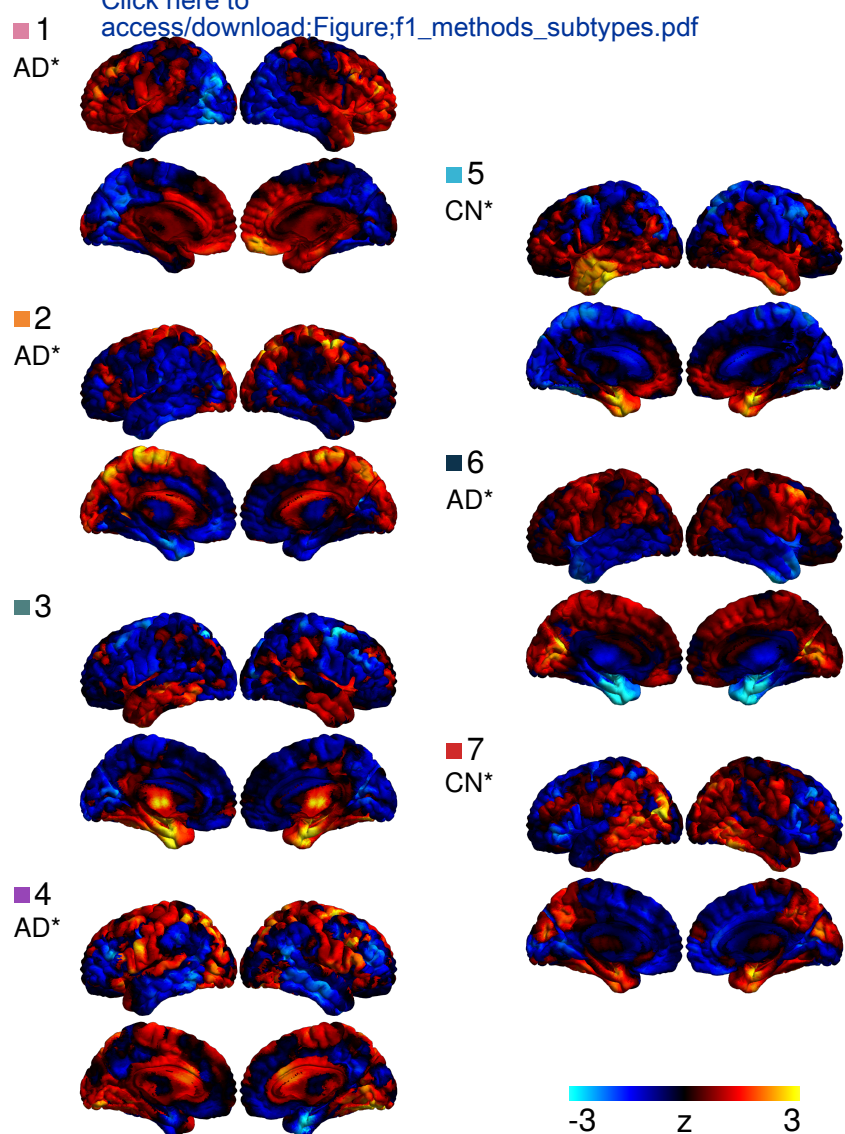



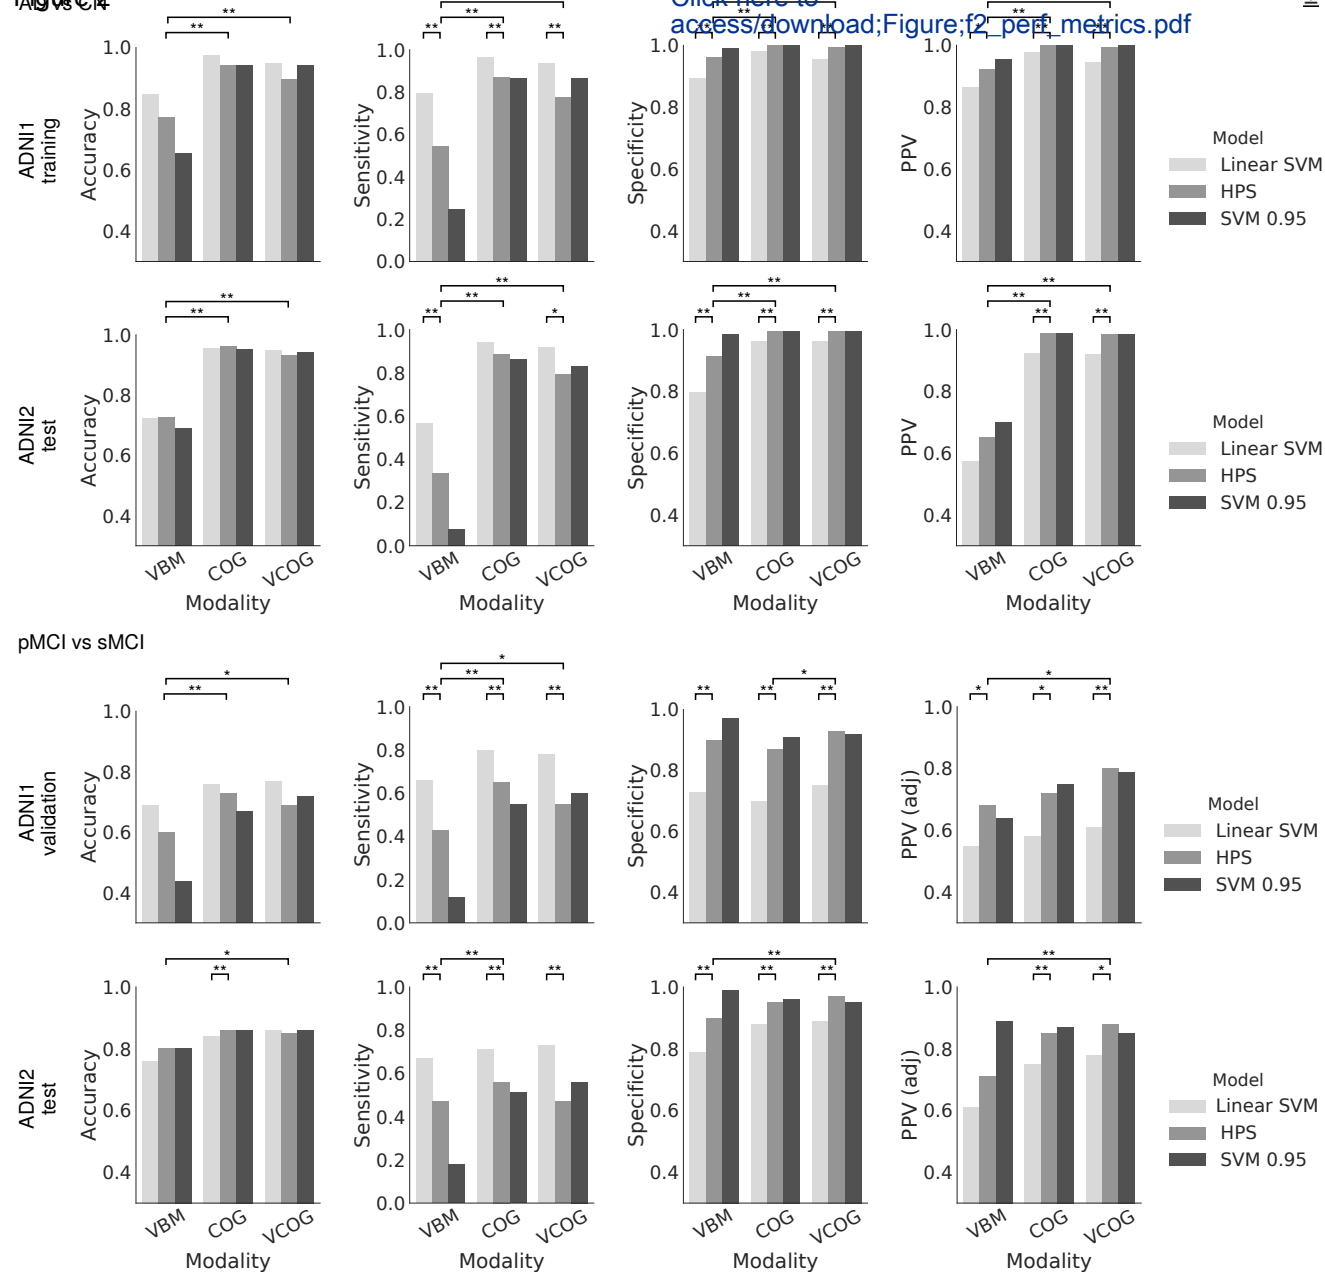

Figure 3

[Click here to access/download:Figure,f3\\_roc\\_curves\\_vbm](#)
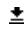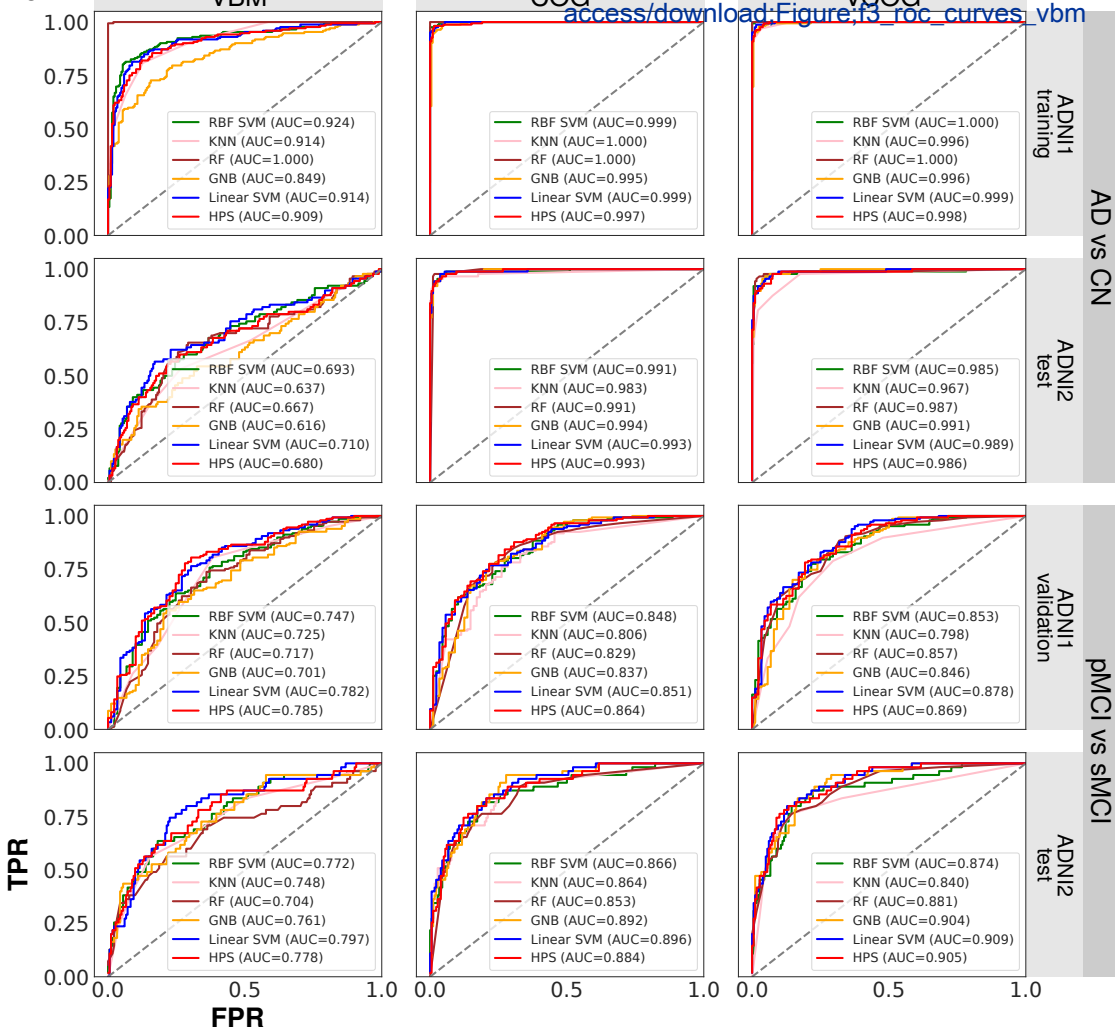

AD vs CN  
pMCI vs sMCI

Figure 4

Click here to [access/download;Figure;f4\\_mci\\_biomarker](#)

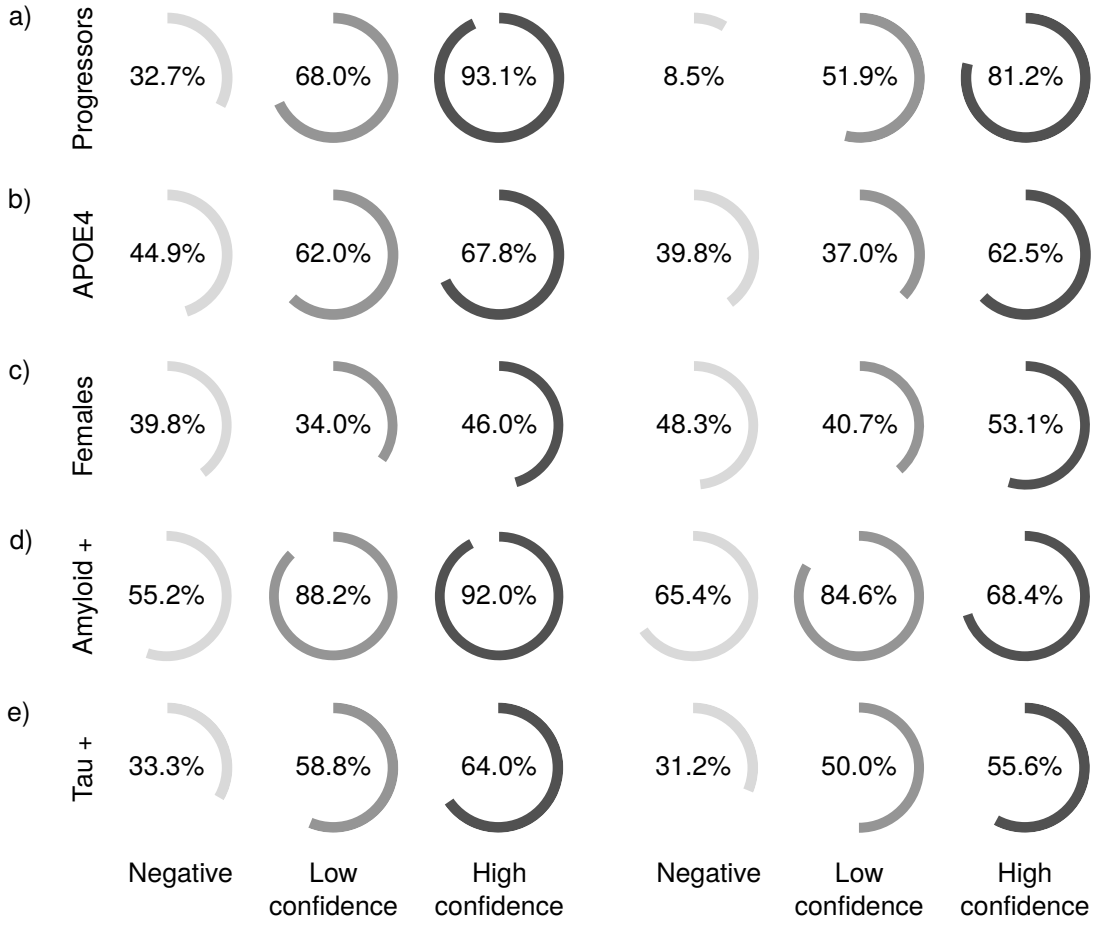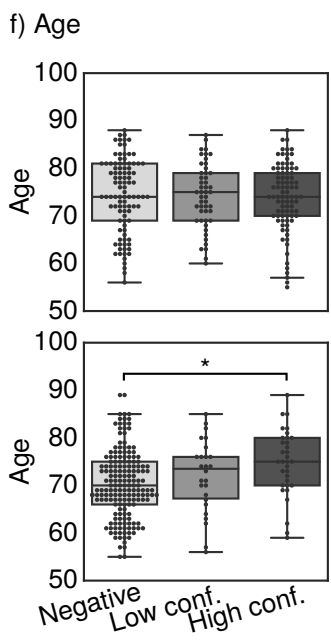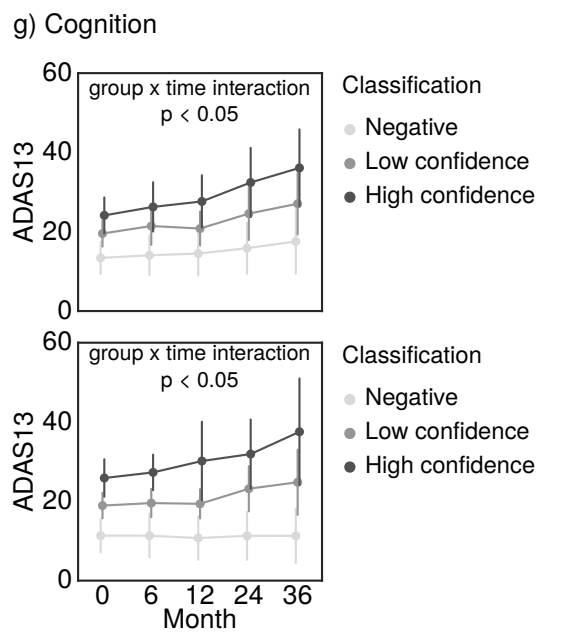

Figure 5) VCOG HPS model

[Click here to access/download;Figure;f5\\_](#)

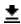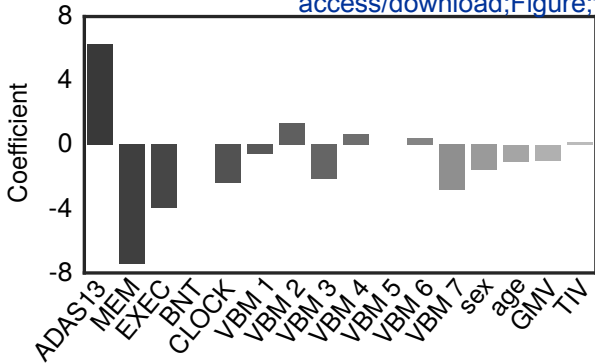

b) COG HPS model

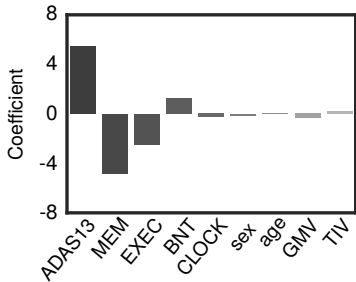

c) VBM HPS model

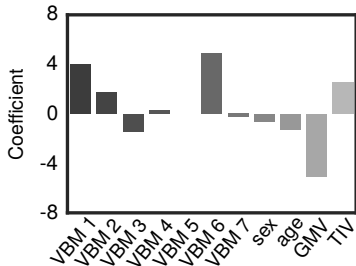

Figure 6 ADNI1

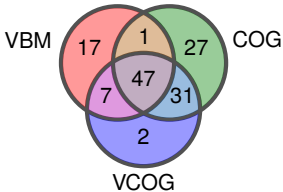

[Click here to access/download;Fig](#)

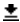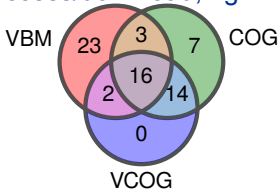

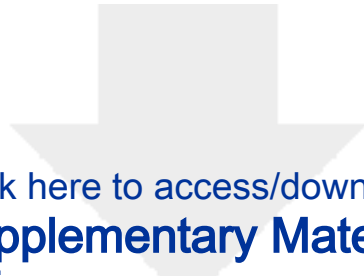

Click here to access/download  
**Supplementary Material**  
gigascience\_vcog\_suppmat.pdf

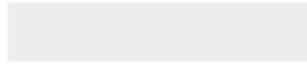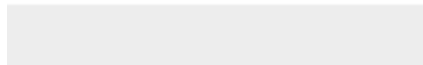

March 8, 2019

Re: Submission to GigaScience

Dear Editors,

Please find enclosed our revised manuscript titled “A highly predictive signature of cognition and brain atrophy for progression to Alzheimer’s dementia” for your consideration.

We would like to thank the editor and the three reviewers for the constructive and insightful feedback. We believe that this round of revision has substantially improved the paper.

Please find our responses to the reviewers’ comments on the following pages.

Best regards,  
Angela Tam, on behalf of the co-authors

## Editor

**Overall the reviewers request more clarification in the methods/ techniques used, and also justification of the two-stage linear model chosen, over a single stage logistic regression model. They also suggest that you expand the discussion section to include more comparison of the results with other results of the proposed algorithm (i.e. PPV, sensitivity, and specificity) with that of other machine learning studies that used sMRI (or resting-state fMRI) and/or neuropsychological measures as input features.**

We have followed the recommendations of the reviewers by clarifying the methods section and explaining the rationale behind the two-stage linear model. We added a collection of popular machine learning techniques as benchmark, and revised the positioning of the paper to emphasize that our contribution is to train a machine learning model in a regime of high specificity and positive positive value, rather than proposing a novel algorithm with improved overall accuracy. A more extensive survey of previously published machine learning studies that use MRI and neuropsychological measures have also been included in the discussion.

## Reviewer #1

**A multimodal signature of Alzheimer's dementia was first extracted using machine learning tools in the ADNI1 sample, and was comprised of cognitive deficits across multiple domains as well as atrophy in temporal, parietal and occipital regions. The authors then validated the predictive value of this signature on two MCI cohorts.**

### **(1) How do you select the baseline of T1 scans of ADNI?**

All T1-weighted MRI scans for the healthy control (CN) and Alzheimer's dementia (AD) patients that were acquired at baseline from ADNI1 and ADNI2 were included in the study. This was also the case for the patients with mild cognitive impairment (MCI), but with additional inclusion criteria. For the MCI group, each subject must have had at least 36 months of follow-up for inclusion in our study.

Please see the "Data" section under "Materials and methods" on page 5.

### **(2) What preprocessing techniques did you use? Did you perform any normalization technique?**

Each image was linearly co-registered to MNI space using the CIVET pipeline and then segmented into grey matter, white matter, and CSF probabilistic maps with SPM12. The DARTEL toolbox was used to normalize the grey matter segmentations to a predefined grey



matter template in MNI152 space. Each map was modulated to preserve the total amount of signal and then smoothed with a 8 mm isotropic Gaussian blurring kernel.

Please see the section “Structural features from voxel-based morphometry” under “Materials and methods” on page 6.

**(3) Why use GMV and TIV?**

TIV has been shown to have significant effects on regional grey matter volumes and has been recommended as a variable to take into consideration for VBM analyses (Barnes, Josephine, Gerard R. Ridgway, Jonathan Bartlett, Susie M. D. Henley, Manja Lehmann, Nicola Hobbs, Matthew J. Clarkson, David G. MacManus, Sebastien Ourselin, and Nick C. Fox. 2010. “Head Size, Age and Gender Adjustment in MRI Studies: A Necessary Nuisance?” *NeuroImage* 53 (4): 1244–55.)

**(4) Is your method a type of VBM technique?**

Yes.

**(5) Line 168, why use a linear support vector machine (SVM)? Did you consider to use kernel SVMs?**

We have included an SVM with a RBF kernel for comparison. Please see Figure 3.

**(6) Some AD detection methods could be discussed, see "Multivariate approach for Alzheimer's disease detection using stationary wavelet entropy and predator-prey particle swarm optimization" and "Single Slice based Detection for Alzheimer's disease via wavelet entropy and multilayer perceptron trained by biogeography-based optimization"**

The suggested papers by reviewer #1 describe detection of patients with AD dementia from healthy controls. Since the focus of our current paper is to detect progression to AD dementia in patients with MCI from those who will remain cognitively stable, we do not think papers about classifying AD vs controls are as relevant as those that focus on progressors vs non-progressors, which we have discussed at length.

**(7) How do you optimize the hyperparameters of SVM?**

The hyperparameters of the SVM were optimized by a cross-validated grid search over a parameter grid. See “Prediction of high confidence AD dementia cases in ADNI1” under the “Materials and methods” section, pages 7-8.

**(8) What type of t-test did you use? How did you set the confidence threshold? Did you use ANOVA?**

Yes, ANOVAs were used. Tukey's HSD tests were done for the pairwise post-hoc t-tests. See "Statistical tests of association of progression, AD biomarkers, and risk factors in high confidence MCI subjects" under the "Materials and methods" section, pages 10-11.

**(9) How do you combine and generate the final signature?**

The third signature (VCOG) was generated by including the VBM structural subtype weights, cognitive assessment scores, mean gray matter volume, total intracranial volume, age, and sex as features into the linear SVM on ADNI1 subjects to classify AD vs controls. This process was repeated across many random subsamples, after which hit probabilities for all individual subjects were calculated. A logistic regression classifier, with L1 regularization on the coefficients, was then used to classify the subjects with 100% hit probability from everyone else. Please refer to "Prediction of high confidence AD dementia cases in ADNI1" under the "Materials and methods" section, pages 7-8.

## Reviewer #2

**The aim of this manuscript was to explore whether a linear model based classifier of AD could identify MCI patients with a "highly predictive signature" of AD and whether this represents a prodromal stage of AD by investigating how the HPS relates to genetic and phenotypic information. This is an interesting manuscript, however there are multiple opportunities for improvement, mostly with regard to justification of the 2-stage linear model, over a single stage logistic regression model.**

There are two justifications for using the two-stage linear model. First, by construction, it focuses on patients for which the outcome of the stage 1 model is highly stable. Stability of prediction is valuable when selecting participants, as we would not want the inclusion criteria of a study to vary substantially based on the specific sample used to train the model. Second, by achieving stability, the two-stage model also naturally falls in a regime of high specificity. We could have used a different approach, such as thresholding the confidence score generated by the SVM, as was done by Korolev et al. (2016). But it would have required in any case the selection of an arbitrary threshold. We explain our choice of using the two-stage model in Table 1 under Objective 2b and on pages 7-8 under "Prediction of high confidence AD dementia cases in ADNI1" in the Methods section.

**Page 6: Prediction of easy AD dementia cases in ADNI1**

**This section is difficult for the reader to follow. e.g. what is meant by "20% test size"? 5 fold CV?**

**Maybe a diagram would help to explain what is meant here.**

**Also this section would benefit from an explanation of the purpose of the 2-stage linear model prediction.**

We used a random permutation cross-validator to split the data into 50 training and test sets, where the size of the test set was always 20% of the original sample size. This is clarified on pages 7-8 under "Prediction of high confidence AD dementia cases in ADNI1".

We have added to this section on pages 7-8 an explanation of the two-stage model: "We then used a two-step method to select an operating point for the linear SVM to obtain a highly precise and specific classification [20]. This was done by replicating the SVM prediction via subsampling and identifying the patients with highly robust prediction outcomes, i.e. who are consistently identified as AD during testing, regardless of the training subsample and the validity of the prediction. This approach was found to lead in practice to prediction that achieve high specificity, in addition to offering a guarantee of robustness; see [20] for more information."

**Page 6: Prediction of progression to AD dementia from the MCI stage in ADNI1**

**Line 191: "We re-trained our models on AD vs CN after**

**optimizing our hyperparameters (resampling size and resampling ratio)"**

**Its not clear what is meant here and also why resampling size is a hyperparameter of the model.**

We have clarified the text and changed the terms resampling size and resampling ratio to number of subsamples and subsample size, respectively. We varied the number of subsamples and the subsample size to perturb the model and identify subjects that had robust outcomes during the testing phase regardless of the training subsample. Please refer to page 9 in the Methods section under "Prediction of progression to AD dementia from the MCI stage in ADNI1".

**Page 10, Line 311: "The HPS models consistently outperformed the base SVM classifiers with respect to**

**specificity ( $p < 0.001$ )" Its not clear if this is a meaningful comparison (see Fig. 2 comment below)**

**Figure 2: Is this the most appropriate way of plotting this data? Might it be more meaningful to assess the model using the AUC of an ROC curve?**

**From this graph it looks as if the HPS model might be worse than the base classifier.**

ROC curves have been added in a new figure (Figure 3) and AUC is reported within this figure.

**Also - naming the model HPS is confusing given the grouping of subjects into HPS, non-HPS etc.**

We now refer to the HPS+ subjects as high confidence subjects and non-HPS+ as low confidence subjects.

**Page 14, Line 417 "The high specificity of our two-stage model indeed came at a cost of reduced sensitivity"**

**There is always a trade of between sensitivity and specificity that is not acknowledged here.**

We have included a section that discusses the trade-off between sensitivity and specificity in the results: "Trade-off between sensitivity and specificity of different algorithms" on page 16. We also emphasize more this important trade-off in the abstract, introduction and the summary table of objectives, experiments and results (Table 1).

**Page 14, Line 423 "The two-stage prediction model offered the advantage of a principled approach to train the prediction model in a high-specificity regime, based on stability." It is unclear what what "high-specificity regime" means and why the 2-stage model relates to stability.**

By "high specificity regime", we were referring to an operating point along the ROC curve where specificity is much higher compared to sensitivity. The two-stage model ensures high specificity (at a cost to sensitivity) as it selects the most robust (or stable) individuals after subsampling many times and identifying the subjects that are consistently identified as targets across the training subsamples. Please see "Prediction of high confidence AD dementia cases in ADNI1" under the Methods section on pages 7-8.

## Reviewer #3

**This study investigated a machine learning approach to identify high-risk MCI patients using five neuropsychological measures and structural MRI (sMRI). By combining the neuropsychological and sMRI features, the authors identified pMCI patients with 80.4% positive predictive value (PPV) in ADNI1 cohort and 87.8% PPV in ADNI2 cohort. While specificity of the proposed algorithm is high (>95%), sensitivity of the algorithm is fairly low (47.3% for ADNI2). This study addressed an important topic in Alzheimer disease which is to identify high-risk MCI patients. In addition, the manuscript was written well with clear descriptions for the methods and results. However, the novelty of this study is limited. The following comments need to be addressed.**

- The emphasis of this study was to achieve a large value for PPV (and specificity) in identification of pMCI patients, but low sensitivity of the proposed algorithm was the cost of this achievement. The authors mentioned that expensive clinical trials can benefit from the proposed algorithm since false positives need to be minimized in this setting. However, this application of the proposed algorithm is arguable in that only a subset of pMCI patients (~50% of pMCI referring to ~50% sensitivity) will be identified by the algorithm and including only these extreme pMCI cases may cause a bias in results of the clinical trials.

Clinical trial inclusion criteria are typically designed to be restrictive in the aims of achieving a specific and homogenous subpopulation, therefore implementing an automatic algorithm that will maximize PPV and specificity to select individuals will help clinical trials achieve their recruitment goals in a cost and time-efficient manner.

- This study has a limited novelty which is to develop an algorithm to provide a high PPV in identification of pMCI patients, in the cost of low sensitivity. There are several studies investigated classification of pMCI and sMCI using neuroimaging (e.g. sMRI and resting-state fMRI) and/or neuropsychological measures (e.g. [Suk et al., 2014, Neuroimage 101, 569-582] and [Hojjati et al., 2018, Comput Biol Med 102, 30-39]. In fact, the authors compared PPV of their algorithm with that of only three previous studies [7-9], and two of these studies were performed by themselves. I recommend to expand this section of discussion by comparing results of the proposed algorithm (i.e. PPV, sensitivity, and specificity) with that of other machine learning studies that used sMRI (or resting-state fMRI) and/or neuropsychological measures as input features.

Other machine learning studies that used imaging and neuropsychological measures as features were indeed missing in our citations. We have expanded the list of cited works in the revision (see references #7,8,10-16). We thank the reviewer for noticing this error.

- Please add a table and summarize results of Figure 2. Please also add accuracy and AUC to this table.

We have added ROC curves as a figure (Figure 3) and AUC are now reported there. Accuracy has now been included in Figure 2 and the results have been summarized on pages 13-15 under the sections "Prediction of AD dementia vs cognitively normal individuals", "Identification of high confidence cases for prediction", and "High confidence prediction of progression to AD dementia".

#### Minor points:

- Line# 132: Please correct "with with" - done
- Line# 146: I recommend replacing "n subject x n subtype" to "n subject x m subtype (n=377 and m = 7)" - done
- Line#147: Please spell out VBM. - done

- **Line# 185-186: "three highly predictive signatures (HPS)" in this sentence is confusing. What does the signature mean? Do you mean three models? If not, please define signature here.**

Yes we meant models and have added that in for clarification.

- **Figures, and in particular Figure 1, have a low quality.**

We believe the figures were downsampled during the PDF build, but we changed the final format of the figures (from TIFF to PDF) for this revision.
